# Supplementary material for: Microbial diversity of the remote Trindade Island, Brazil: a systematic review
Source: PeerJ journal article supplement (doi:10.7717/peerj.19305), 2025-04-30
Supplement: SuppTables.zip [file SuppTables.zip]

## Sheet: Scopus
Authors	Author full names	Author(s) ID	Title	Year	Source title	Cited by	DOI	Link	Abstract	Author Keywords	Index Keywords	Language of Original Document	Document Type	Publication Stage	Open Access	Source	EID
Sánchez-González M.; Álvarez-Uribe H.; Rivera-Solís R.; González-Burgos A.; Escalante-Réndiz D.; Rojas-Herrera R.	Sánchez-González, M. (36773559200); Álvarez-Uribe, H. (57205298996); Rivera-Solís, R. (55797935900); González-Burgos, A. (57191693207); Escalante-Réndiz, D. (55831845900); Rojas-Herrera, R. (6506480972)	36773559200; 57205298996; 55797935900; 57191693207; 55831845900; 6506480972	Analysis of a phenol-adapted microbial community: degradation capacity, taxonomy and metabolic description	2019	Journal of Applied Microbiology	6	10.1111/jam.14166	https://www.scopus.com/inward/record.uri?eid=2-s2.0-85059473402&doi=10.1111%2fjam.14166&partnerID=40&md5=fbbe5e3c974319f2da3514871a8b1ff4	Aims: In this study, the ability of the consortium MR-01 to degrade phenol was determined. The effects of this chemical on the taxonomy and the metabolic behaviour were analysed through metagenomics. Methods and Results: Consortium MR-01 was acclimated in a sublethal concentration of phenol. After this process, the capacity to degrade this molecule was analysed. Results showed that degradation in…	aromatic metabolism; bacterial community; Black Queen Hypothesis; degradation; metagenomics; phenol	Bacteria; Bacterial Proteins; Biodegradation, Environmental; Metagenomics; Microbiota; Mixed Function Oxygenases; Phenol; Phylogeny; Actinomycetales; Bacteria (microorganisms); Chloroflexales; Sphingomonadales; Bacteria; Biodegradation; Metabolism; Taxonomies; phenol; unspecific monooxygenase; bacterial protein; mixed function oxidase; phenol; phenol 2-monooxygenase; Aerobic condition; Aromatic m…	English	Article	Final		Scopus	2-s2.0-85059473402
Liu P.-F.; Yang Z.-H.; Chen Y.-L.; Lo K.-H.; Kao C.-M.	Liu, Pu-Fong (57223323159); Yang, Zong-Han (55511277800); Chen, Ya-Lei (7601433190); Lo, Kai-Hong (57210819305); Kao, Chih-Ming (7403683128)	57223323159; 55511277800; 7601433190; 57210819305; 7403683128	Remediation of weathered diesel-oil contaminated soils using biopile systems: An amendment selection and pilot-scale study	2021	Science of the Total Environment	8	10.1016/j.scitotenv.2021.147395	https://www.scopus.com/inward/record.uri?eid=2-s2.0-85105571381&doi=10.1016%2fj.scitotenv.2021.147395&partnerID=40&md5=c7c922cd30c8d88935b8ed173b4bf1c3	Weathered diesel oil (WDO) has less biodegradable and volatile characteristics, and its bioremediation could be a challenge. In this study, the effectiveness of enhanced bioremediation via biopile processes for the cleanup of WDO-contaminated soils was evaluated. Six biopiles were constructed and operated with the following six different amendments addition: red bran (12 kg), water-soluble fertil…	Biopile; Bioremediation; Metagenomics; TPH-contaminated soils; Weathered diesel oil	Bacteria (microorganisms); Pseudomonas; Sphingomonas; Bacteria; Biochemical oxygen demand; Biodegradation; Biodiversity; Biotechnology; Contamination; Decay (organic); Diesel engines; Dissolved oxygen; Efficiency; Gasoline; Hydrocarbons; Mixtures; Soil moisture; Soil pollution; carbon; diesel fuel; dissolved oxygen; fertilizer; oxygenated water; petroleum derivative; unclassified drug; water; Bio…	English	Article	Final		Scopus	2-s2.0-85105571381
Hundt P.J.; Hundt M.J.; Staley C.; Sadowsky M.J.; Simons A.M.	Hundt, Peter J. (55507733700); Hundt, Matthew J. (8855655800); Staley, Christopher (23978959100); Sadowsky, Michael J. (7006659421); Simons, Andrew M. (37102730500)	55507733700; 8855655800; 23978959100; 7006659421; 37102730500	The diet and gut microbial communities of two closely related combtooth blennies, chasmodes saburrae and scartella cristata	2017	Copeia	5	10.1643/CI-16-505	https://www.scopus.com/inward/record.uri?eid=2-s2.0-85021140657&doi=10.1643%2fCI-16-505&partnerID=40&md5=3b33d00f04f0205e73b23e24539b31e0	The digestive tracts of fishes contain a diverse set of gut associated microbiota known to contribute to many functions of the fishes' biology. Furthermore, it has been suggested that divergence in diets between two species is also associated with shifts in gut associated microbiota. Herein, we describe and compare the diet and gastrointestinal microbiota of two closely related combtooth blennies…		Florida [United States]; United States; Bacteria (microorganisms); Blenniidae; Blennioidei; Chasmodes saburrae; Crustacea; Fusobacteriaceae; Gammaproteobacteria; Methylococcaceae; Pisces; Scartella cristata; Vibrionaceae; bacterium; benthos; crustacean; diet; digestion; digestive system; divergence; epiphyte; microbial community; perciform; relative abundance; trophic status	English	Article	Final		Scopus	2-s2.0-85021140657
Câmara P.E.A.S.; Bones F.L.V.; Lopes F.A.C.; Oliveira F.S.; Barreto C.C.; Knop Henriques D.; Campos L.P.; Carvalho-Silva M.; Convey P.; Rosa L.H.	Câmara, Paulo E. A. S. (24553661500); Bones, Fábio Leal Viana (57196944411); Lopes, Fabyano Alvares Cardoso (56539413300); Oliveira, Fabio S. (55588262900); Barreto, Cristine Chaves (7003758039); Knop Henriques, Diego (57647291300); Campos, Larissa Paraguassu (57193312545); Carvalho-Silva, Micheline (24553652000); Convey, Peter (7003362070); Rosa, Luiz Henrique (9335988300)	24553661500; 57196944411; 56539413300; 55588262900; 7003758039; 57647291300; 57193312545; 24553652000; 7003362070; 9335988300	DNA Metabarcoding Reveals Cryptic Diversity in Forest Soils on the Isolated Brazilian Trindade Island, South Atlantic	2023	Microbial Ecology	4	10.1007/s00248-022-02018-4	https://www.scopus.com/inward/record.uri?eid=2-s2.0-85128960130&doi=10.1007%2fs00248-022-02018-4&partnerID=40&md5=df6133fc311c11adfc34e1c070d9a8c3	Located 1140 km from the South American coastline in the South Atlantic Ocean and with an age of 4 million years, Trindade Island is the most recent volcanic component of Brazilian territory. Its original native vegetation has been severely damaged by human influence, in particular through the introduction of exotic grazing animals such as goats. However, since the complete eradication of goats a…	Conservation; Environmental DNA; Soil; South Atlantic islands	Animals; Archaea; Bacteria; Biodiversity; Brazil; Child, Preschool; DNA Barcoding, Taxonomic; Eukaryota; Forests; Fungi; Humans; Plants; Soil; animal; archaeon; bacterium; biodiversity; Brazil; DNA barcoding; eukaryote; forest; fungus; human; plant; preschool child; soil	English	Article	Final		Scopus	2-s2.0-85128960130
De Biasi J.B.; Dias R.M.; Santos V.C.; Mantellato A.M.B.; Farro A.P.C.; Hostim-Silva M.; Hackradt C.W.; Félix-Hackradt F.C.	De Biasi, Juliana Beltramin (56968227000); Dias, Ricardo Marques (56835196100); Santos, Vinicius Castro (57660126000); Mantellato, Aline Meira Bonfim (58652379600); Farro, Ana Paula Cazerta (11539738800); Hostim-Silva, Mauricio (6507465318); Hackradt, Carlos Werner (23980007300); Félix-Hackradt, Fabiana Cézar (25824886600)	56968227000; 56835196100; 57660126000; 58652379600; 11539738800; 6507465318; 23980007300; 25824886600	The effect of a mining dam failure on the genetic diversity and population resilience of marine fishes along the eastern Brazilian coast	2023	Regional Studies in Marine Science	0	10.1016/j.rsma.2023.103239	https://www.scopus.com/inward/record.uri?eid=2-s2.0-85174351157&doi=10.1016%2fj.rsma.2023.103239&partnerID=40&md5=b1b5d67127fbc4916e898d84ee73f689	We used microsatellite DNA markers to examine the impact of the Fundão Dam failure, one of the world's worst mining-related environmental disasters, on the genetic diversity of four marine and estuarine fishes across the Brazilian east coast's continental shelf and estuarine ecosystems. The strong mud flow along the Doce River and nearby areas resulted in changes in genetic diversity, with all sp…	Environmental disaster; Ichthyofauna; Impact assessment; Mariana's dam burst; Microsatellite markers		English	Article	Final		Scopus	2-s2.0-85174351157
Ledezma-Villanueva A.; Adame-Rodríguez J.M.; Aréchiga-Carvajal E.T.	Ledezma-Villanueva, Alejandro (56653515200); Adame-Rodríguez, José Manuel (58707071200); Aréchiga-Carvajal, Elva T. (56000781600)	56653515200; 58707071200; 56000781600	Transcriptomics as a First Choice Gate for Fungal Biodegradation Processes Description	2018	Nanotechnology in the Life Sciences	1	10.1007/978-3-030-02369-0_2	https://www.scopus.com/inward/record.uri?eid=2-s2.0-85101620490&doi=10.1007%2f978-3-030-02369-0_2&partnerID=40&md5=9eca6286289abda46c38867246c9f910	Environmental impacts of xenobiotic compounds released to air, water, and soil have opened a way for bioremediation to emerge as a green technology that can be safely applied to reduce pollutant concentrations to a minimum in a relative short period of time. “Hard to break” molecules such as asphaltenes, celluloses, and dyes are better treated with mycoremediation techniques. Fungi are higher euk…	Fungal bioremediation; Fungal enzymes; Nucleic acid extraction; Transcriptomics		English	Book chapter	Final		Scopus	2-s2.0-85101620490
Meirelles P.M.; Amado-Filho G.M.; Pereira-Filho G.H.; Pinheiro H.T.; De Moura R.L.; Joyeux J.-C.; Mazzei E.F.; Bastos A.C.; Edwards R.A.; Dinsdale E.; Paranhos R.; Santos E.O.; Iida T.; Gotoh K.; Nakamura S.; Sawabe T.; Rezende C.E.; Gadelha L.M.R., Jr.; Francini-Filho R.B.; Thompson C.; Thompson F.L.	Meirelles, Pedro M. (36911499000); Amado-Filho, Gilberto M. (55889089300); Pereira-Filho, Guilherme H. (36700133700); Pinheiro, Hudson T. (34768994100); De Moura, Rodrigo L. (7003737278); Joyeux, Jean-Christophe (6603478244); Mazzei, Eric F. (39061870500); Bastos, Alex C. (16318814300); Edwards, Robert A. (35560915600); Dinsdale, Elizabeth (6602355182); Paranhos, Rodolfo (6602752011); Santos, Eid…	36911499000; 55889089300; 36700133700; 34768994100; 7003737278; 6603478244; 39061870500; 16318814300; 35560915600; 6602355182; 6602752011; 24081381200; 7402683497; 24829133500; 35315778200; 7005210845; 7004919328; 24921373000; 6507776920; 7404238407; 7202217597	Baseline assessment of mesophotic reefs of the Vitória-Trindade Seamount Chain based on water quality, microbial diversity, benthic cover and fish biomass data	2015	PLoS ONE	57	10.1371/journal.pone.0130084	https://www.scopus.com/inward/record.uri?eid=2-s2.0-84939155413&doi=10.1371%2fjournal.pone.0130084&partnerID=40&md5=152c55dae6efea73caa6fa6e60880aa9	Seamounts are considered important sources of biodiversity and minerals. However, their biodiversity and health status are not well understood; therefore, potential conservation problems are unknown. The mesophotic reefs of the Vitória-Trindade Seamount Chain (VTC) were investigated via benthic community and fish surveys, metagenomic and water chemistry analyses, and water microbial abundance est…		Animals; Atlantic Ocean; Biodiversity; Biomass; Brazil; Coral Reefs; Ecosystem; Fishes; Metagenomics; Water Microbiology; Water Quality; algae; Anthozoa; Chlorophyta; Streptophyta; organic carbon; sea water; alga; Article; benthos; biomass; carnivore; controlled study; coral reef; coralline alga; fish; green alga; light stress; marine environment; metagenomics; microbial diversity; nonhuman; popu…	English	Article	Final	All Open Access; Gold Open Access; Green Open Access	Scopus	2-s2.0-84939155413
Sarkar B.; Mandal A.K.; Ghati A.; Ghosh P.; Mandal S.; Kati A.	Sarkar, Biraj (57217230983); Mandal, Amit Kumar (57225124663); Ghati, Amit (55062288200); Ghosh, Pranab (57212696907); Mandal, Sukhendu (56405049200); Kati, Ahmet (55601710500)	57217230983; 57225124663; 55062288200; 57212696907; 56405049200; 55601710500	Whole-Genome Shotgun (WGS) Sequence of cis -Isoprene Polymer-Degrading Nocardia sp. strain BSTN01	2022	Microbiology Resource Announcements	0	10.1128/mra.01175-21	https://www.scopus.com/inward/record.uri?eid=2-s2.0-85128626552&doi=10.1128%2fmra.01175-21&partnerID=40&md5=5f7a55171f143ca38262ec8c1b866109	Species belonging to the genus Nocardia are known to be facultative human pathogens. There are also reports of Nocardia species capable of degrading various forms of rubber. Here, we report the whole-genome shotgun (WGS) sequence of Nocardia sp. strain BSTN01, isolated from stored water in latex-collecting cups thrown away near a local rubber processing unit in Tripura, India. © 2022 Sarkar et al.		genomic DNA; isoprene; ribosome RNA; rubber; transfer RNA; Article; bacterial gene; bacterial strain; biodegradation; DNA library; gene sequence; genetic code; genome size; Hevea brasiliensis; lcp gene; Nocardia; nonhuman; shotgun sequencing; Tripura; waste management; whole genome sequencing; whole genome shotgun sequencing	English	Article	Final	All Open Access; Gold Open Access; Green Open Access	Scopus	2-s2.0-85128626552
Guan X.; Jia D.; Liu X.; Ding C.; Guo J.; Yao M.; Zhang Z.; Zhou M.; Sun J.	Guan, Xin (59176095700); Jia, Dai (57219933330); Liu, Xinyu (59176231400); Ding, Changling (55759825400); Guo, Jinfei (59176231500); Yao, Min (59175436800); Zhang, Zhan (59175964900); Zhou, Mengxi (59175965000); Sun, Jun (56768359400)	59176095700; 57219933330; 59176231400; 55759825400; 59176231500; 59175436800; 59175964900; 59175965000; 56768359400	Combined influence of the nanoplastics and polycyclic aromatic hydrocarbons exposure on microbial community in seawater environment	2024	Science of the Total Environment	0	10.1016/j.scitotenv.2024.173772	https://www.scopus.com/inward/record.uri?eid=2-s2.0-85196178348&doi=10.1016%2fj.scitotenv.2024.173772&partnerID=40&md5=ef4d0c5e3e19c08f93c26a312fc695bb	Nanoplastics (NPs) and polycyclic aromatic hydrocarbons (PAHs) are recognized as persistent organic pollutant (POPs) with demonstrated physiological toxicity. When present in aquatic environments, the two pollutants could combine with each other, resulting in cumulative toxicity to organisms. However, the combined impact of NPs and PAHs on microorganisms in seawater is not well understood. In thi…	Nanoplastics; Network complexity; PAHs degradation; Polycyclic aromatic hydrocarbons; Seawater microorganism	Bacteria; Biodiversity; Environmental Monitoring; Microbiota; Microplastics; Polycyclic Aromatic Hydrocarbons; Seawater; Water Microbiology; Water Pollutants, Chemical; Aquatic organisms; Arches; Aromatization; Biodegradation; Biodiversity; Complex networks; Degradation; Ecosystems; Mineral oils; Organic pollutants; Polycyclic aromatic hydrocarbons; Seawater; Toxicity; nanoplastic; phenanthrene; …	English	Article	Final		Scopus	2-s2.0-85196178348
Rodríguez-Castro K.G.; Saranholi B.H.; De Oliveira M.E.; Sales N.G.	Rodríguez-Castro, Karen Giselle (36490413600); Saranholi, Bruno H. (57189897305); De Oliveira, Marina E. (57295336500); Sales, Naiara Guimarães (56653286900)	36490413600; 57189897305; 57295336500; 56653286900	Environmental and Invertebrate-Derived DNA: A Powerful Approach for Surveying and Monitoring Biodiversity	2023	Conservation Genetics in the Neotropics	1	10.1007/978-3-031-34854-9_18	https://www.scopus.com/inward/record.uri?eid=2-s2.0-85195334584&doi=10.1007%2f978-3-031-34854-9_18&partnerID=40&md5=1080a6e673629f054875e1410c6f3164	To know the organisms that surround us has always seemed a fascinating idea and a necessity to characterize an area and estimate its natural values. However, performing complete surveys of the organisms is not always an easy task, because some of them inhabit difficult-to-access areas, and some are rare or difficult to be visualized. The analysis of the DNA retrieved from environmental samples (f…			English	Book chapter	Final		Scopus	2-s2.0-85195334584
Rodrigues E.M.; Morais D.K.; Pylro V.S.; Redmile-Gordon M.; de Oliveira J.A.; Roesch L.F.W.; Cesar D.E.; Tótola M.R.	Rodrigues, Edmo Montes (56549532300); Morais, Daniel Kumazawa (55901139400); Pylro, Victor Satler (36451334400); Redmile-Gordon, Marc (37061811100); de Oliveira, Juraci Alves (7202554652); Roesch, Luiz Fernando Wurdig (14421897000); Cesar, Dionéia Evangelista (55413390200); Tótola, Marcos Rogério (8663984300)	56549532300; 55901139400; 36451334400; 37061811100; 7202554652; 14421897000; 55413390200; 8663984300	Aliphatic Hydrocarbon Enhances Phenanthrene Degradation by Autochthonous Prokaryotic Communities from a Pristine Seawater	2018	Microbial Ecology	11	10.1007/s00248-017-1078-8	https://www.scopus.com/inward/record.uri?eid=2-s2.0-85043686929&doi=10.1007%2fs00248-017-1078-8&partnerID=40&md5=62ad5c436d57c1bc55e1abdd3134d04b	The microbial diversity and functioning around oceanic islands is poorly described, despite its importance for ecosystem homeostasis. Here, we aimed to verify the occurrence of microbe-driven phenanthrene co-oxidation in the seawater surrounding the Trindade Island (Brazil). We also used Next-Generation Sequencing to evaluate the effects of aliphatic and polycyclic aromatic hydrocarbons (PAHs) on…	Hydrocarbon biodegradation; Hydrocarbonoclastic bacteria; Metagenomics; Microbial ecology; Pristine environment; Trindade Island	Alkanes; Alphaproteobacteria; Bacteria; Biodegradation, Environmental; Biodiversity; Brazil; DNA, Bacterial; Ecosystem; Gammaproteobacteria; High-Throughput Nucleotide Sequencing; Hydrocarbons; Islands; Metagenomics; Microbial Consortia; Petroleum Pollution; Phenanthrenes; Polycyclic Aromatic Hydrocarbons; Pyrenes; RNA, Ribosomal, 16S; Seawater; Water Pollutants; alkane; bacterial DNA; hydrocarbo…	English	Article	Final		Scopus	2-s2.0-85043686929
Jin T.; Wang Y.; Huang Y.; Xu J.; Zhang P.; Wang N.; Liu X.; Chu H.; Liu G.; Jiang H.; Li Y.; Xu J.; Kristiansen K.; Xiao L.; Zhang Y.; Zhang G.; Du G.; Zhang H.; Zou H.; Zhang H.; Jie Z.; Liang S.; Jia H.; Wan J.; Lin D.; Li J.; Fan G.; Yang H.; Wang J.; Bai Y.; Xu X.	Jin, Tao (57201466440); Wang, Yayu (56905473300); Huang, Yueying (57200177802); Xu, Jin (57192711458); Zhang, Pengfan (57200175670); Wang, Nian (58084276600); Liu, Xin (56194243900); Chu, Haiyan (7202364892); Liu, Guang (56905016900); Jiang, Honggang (57200179780); Li, Yuzhen (56905440900); Xu, Jing (57200185328); Kristiansen, Karsten (7102589497); Xiao, Liang (56317000900); Zhang, Yunzeng (56520…	57201466440; 56905473300; 57200177802; 57192711458; 57200175670; 58084276600; 56194243900; 7202364892; 56905016900; 57200179780; 56905440900; 57200185328; 7102589497; 56317000900; 56520481200; 36646940000; 57194206913; 57194757681; 35278968000; 57276487900; 56548311600; 55375920700; 23089006700; 57200181997; 57200174463; 57200176365; 55265089000; 34573719100; 57200022156; 56896541000; 57209530793	Taxonomic structure and functional association of foxtail millet root microbiome	2017	GigaScience	75	10.1093/gigascience/gix089	https://www.scopus.com/inward/record.uri?eid=2-s2.0-85040089640&doi=10.1093%2fgigascience%2fgix089&partnerID=40&md5=e31ce378e967eb50be7bc1b519e2ec8b	The root microbes play pivotal roles in plant productivity, nutrient uptakes, and disease resistance. The root microbial community structure has been extensively investigated by 16S/18S/ITS amplicons and metagenomic sequencing in crops and model plants. However, the functional associations between root microbes and host plant growth are poorly understood. This work investigates the root bacterial…	16S rRNA; Microbiome; Productivity; Root; Setaria italica	Bacteria; DNA Barcoding, Taxonomic; Genome, Bacterial; Microbiota; Millets; Rhizome; RNA, Ribosomal, 16S; RNA 16S; RNA 16S; Acidobacteria; Actinobacteria; Article; Bacteroidetes; community structure; Firmicutes; foxtail millet; geographic distribution; microbial community; microbiome; microhabitat; nonhuman; plant growth; plant root; priority journal; Proteobacteria; rhizosphere; sequence analysi…	English	Article	Final	All Open Access; Gold Open Access; Green Open Access	Scopus	2-s2.0-85040089640
Odle E.; Kahng S.; Riewluang S.; Kurihara K.; Wakeman K.C.	Odle, Eric (57219328810); Kahng, Samuel (13409341700); Riewluang, Siratee (58648493300); Kurihara, Kyoko (58974587300); Wakeman, Kevin C (55190082100)	57219328810; 13409341700; 58648493300; 58974587300; 55190082100	GINSA: an accumulator for paired locality and next-generation small ribosomal subunit sequence data	2024	Bioinformatics	0	10.1093/bioinformatics/btae152	https://www.scopus.com/inward/record.uri?eid=2-s2.0-85189672718&doi=10.1093%2fbioinformatics%2fbtae152&partnerID=40&md5=1b9125a7b3b3a2f7d9c02da0f62eb027	Motivation: Motivated by the challenges of decentralized genetic data spread across multiple international organizations, GINSA leverages the Global Biodiversity Information Facility infrastructure to automatically retrieve and link small ribosomal subunit sequences with locality information. Results: Testing on taxa from major organism groups demonstrates broad applicability across taxonomic lev…		Biodiversity; Software; article; biodiversity; drug analysis; human; nonhuman; small ribosomal subunit; biodiversity; software	English	Article	Final	All Open Access; Gold Open Access	Scopus	2-s2.0-85189672718
Zhang W.; Zhang Q.; Li M.; Wang H.; Li Y.; Peng H.; Feng J.	Zhang, Wenli (57217016851); Zhang, Qian (56145465300); Li, Meng (56918848100); Wang, Hongyu (36656662800); Li, Yao (57192530941); Peng, Haojin (57219178910); Feng, Jiapeng (57219183220)	57217016851; 56145465300; 56918848100; 36656662800; 57192530941; 57219178910; 57219183220	Microbial community and function evaluation in the start-up period of bioaugmented SBR fed with aniline wastewater	2021	Bioresource Technology	51	10.1016/j.biortech.2020.124148	https://www.scopus.com/inward/record.uri?eid=2-s2.0-85091589013&doi=10.1016%2fj.biortech.2020.124148&partnerID=40&md5=710511bbfcef847861849b0f8202044d	An enhanced sequencing batch reactor (SBR) system was developed to treat synthetic wastewater rich in 600 mg/L aniline. The aniline degradation efficiency was almost 100%, and the total nitrogen (TN) removal rate was more than 50%. Metagenomics technology revealed the community structure, functional genes and metabolic mechanism during the start-up of the enhanced reactor. Sequencing results show…	Aniline; Bioaugmentation; Functional gene; Metabolic pathway; Microbial community	Aniline Compounds; Bioreactors; Denitrification; Microbiota; Nitrification; Nitrogen; Sewage; Waste Disposal, Fluid; Waste Water; Actinobacteria; Azoarcus; Bacteroidetes; Chloroflexi; Chloroflexi (class); Delftia; Diaphorobacter; Proteobacteria; Thauera; Aniline; Batch reactors; Degradation; Genes; Metabolism; Nitrates; Nitrogen; Wastewater treatment; aniline; aromatic compound; nitrate; nitrogen…	English	Article	Final		Scopus	2-s2.0-85091589013
Kriangwanich W.; Buddhachat K.; Poommouang A.; Chomdej S.; Thitaram C.; Kaewmong P.; Kittiwattanawong K.; Nganvongpanit K.	Kriangwanich, Wannapimol (57193562170); Buddhachat, Kittisak (55479583300); Poommouang, Anocha (57219910498); Chomdej, Siriwadee (6603499955); Thitaram, Chatchote (23096340200); Kaewmong, Patcharaporn (57188833940); Kittiwattanawong, Kongkiat (14037657800); Nganvongpanit, Korakot (10938930600)	57193562170; 55479583300; 57219910498; 6603499955; 23096340200; 57188833940; 14037657800; 10938930600	Feasibility of melting fingerprint obtained from ISSR-HRM curves for marine mammal species identification	2021	PeerJ	4	10.7717/peerj.11689	https://www.scopus.com/inward/record.uri?eid=2-s2.0-85108826479&doi=10.7717%2fpeerj.11689&partnerID=40&md5=4bd4a1b735d9c9202195239980dc9228	Currently, species identification of stranded marine mammals mostly relies on morphological features, which has inherent challenges. The use of genetic information for marine mammal species identification remains limited, therefore, new approaches that can contribute to a better monitoring of stranded species are needed. In that context, the ISSR-HRM method we have proposed offers a new approach …	Dolphin; Dugong; ISSR; Melting temperature	adult; article; biologist; Cetacea; Dugong; feasibility study; high resolution melting analysis; human; marine mammal; melting temperature; nonhuman; species identification; veterinarian	English	Article	Final	All Open Access; Gold Open Access; Green Open Access	Scopus	2-s2.0-85108826479
Câmara P.E.A.S.; Lopes F.A.C.; Bones F.L.V.; Rodrigues L.A.C.; Carvalho-Silva M.; Stech M.; Convey P.; Rosa L.H.	Câmara, Paulo Eduardo Aguiar Saraiva (24553661500); Lopes, Fabyano Alvares Cardoso (56539413300); Bones, Fábio Leal Viana (57196944411); Rodrigues, Luiz Antonio Costa (57190120965); Carvalho-Silva, Micheline (24553652000); Stech, Michael (7003791195); Convey, Peter (7003362070); Rosa, Luiz Henrique (9335988300)	24553661500; 56539413300; 57196944411; 57190120965; 24553652000; 7003791195; 7003362070; 9335988300	Investigating aerial diversity of non-fungal eukaryotes across a 40° latitudinal transect using DNA metabarcoding	2023	Austral Ecology	2	10.1111/aec.13332	https://www.scopus.com/inward/record.uri?eid=2-s2.0-85153518789&doi=10.1111%2faec.13332&partnerID=40&md5=9c9d1594dc93d6eb60e6eec336a44e5d	The high number of bipolar and widespread bryophyte and microbial taxa in the Antarctic flora suggests the effective Long-Distance Dispersal (LDD) of spores and other propagules from lower latitudes and even the Northern Hemisphere to Antarctica and the sub-Antarctic regions. However, few studies have attempted to document the transfer mechanisms by which potential newcomers may arrive in Antarct…	Antarctica; ITS; South America; South Atlantic; wind dispersal	Antarctica; Brazil; Comandante Ferraz; King George Island; King George Island; Rio de Janeiro; Rio de Janeiro [Brazil]; South Shetland Islands; biodiversity; bryophyte; dispersal; DNA; eukaryote; Northern Hemisphere; range expansion; support vessel; transect	English	Article	Final		Scopus	2-s2.0-85153518789
Song Y.; Li R.; Chen G.; Yan B.; Zhong L.; Wang Y.; Li Y.; Li J.; Zhang Y.	Song, Yingjin (14628051100); Li, Ruiyi (57237482700); Chen, Guanyi (15057599000); Yan, Beibei (35328627600); Zhong, Lei (57198519500); Wang, Yuxin (58393753300); Li, Yihang (57225201844); Li, Jinlei (57225197983); Zhang, Yingxiu (57225201701)	14628051100; 57237482700; 15057599000; 35328627600; 57198519500; 58393753300; 57225201844; 57225197983; 57225201701	Bibliometric analysis of current status on bioremediation of petroleum contaminated soils during 2000–2019	2021	International Journal of Environmental Research and Public Health	8	10.3390/ijerph18168859	https://www.scopus.com/inward/record.uri?eid=2-s2.0-85113721857&doi=10.3390%2fijerph18168859&partnerID=40&md5=c4472c8a86c3c21e6322c041bfedde2b	Petroleum contaminated soils have become a great concern worldwide. Bioremediation has been widely recognized as one of the most promising technologies and has played an important role in solving the issues of petroleum contaminated soils. In this study, a bibliometric analysis using VOSviewer based on Web of Science data was conducted to provide an overview on the field of bioremediation of petr…	Bibliometric analysis; Bioremediation; Petroleum contamination; Soil; VOSviewer	Bibliometrics; Biodegradation, Environmental; Petroleum; Soil; Soil Microbiology; Soil Pollutants; China; United States; Indicator indicator; biosurfactant; cadmium; heavy metal; petroleum; RNA 16S; bioremediation; concentration (composition); petroleum hydrocarbon; soil pollution; soil remediation; aquatic environment; Article; bibliometrics; biodegradability; biodegradation; bioremediation; bio…	English	Article	Final	All Open Access; Gold Open Access	Scopus	2-s2.0-85113721857
Borowik A.; Wyszkowska J.; Kucharski J.	Borowik, Agata (35224480300); Wyszkowska, Jadwiga (55923022600); Kucharski, Jan (56261657800)	35224480300; 55923022600; 56261657800	Microbiological study in petrol-spiked soil	2021	Molecules	11	10.3390/molecules26092664	https://www.scopus.com/inward/record.uri?eid=2-s2.0-85106341478&doi=10.3390%2fmolecules26092664&partnerID=40&md5=96f6b2e30f7b5f3be598e413bfb1956c	The pollution of arable lands and water with petroleum-derived products is still a valid problem, mainly due the extensive works aimed to improve their production technology to reduce fuel consumption and protect engines. An example of the upgraded fuels is the BP 98 unleaded petrol with Active technology. A pot experiment was carried out in which Eutric Cambisol soil was polluted with petrol to …	Degradation hydrocarbons; Microbial diversity; Petrol; Phytoremediation; Soil; Soil enzymes	Actinobacteria; Actinomycetales; Biodegradation, Environmental; Environmental Monitoring; Environmental Pollutants; Gasoline; Hydrocarbons; Metagenome; Microbiota; Petroleum Pollution; Soil Microbiology; Soil Pollutants; gasoline; hydrocarbon; Actinobacteria; Actinomycetales; bioremediation; environmental monitoring; metabolism; metagenome; microbiology; microflora; oil spill; pollutant; soil pol…	English	Article	Final	All Open Access; Gold Open Access; Green Open Access	Scopus	2-s2.0-85106341478
Silva V.C.D.; Fernandes N.	Silva, Vanessa Carvalho da (58565245200); Fernandes, Noemi (35387992500)	58565245200; 35387992500	Protist taxonomic and functional diversity in aquatic ecosystems of the Brazilian Atlantic Forest	2023	PeerJ	1	10.7717/peerj.15762	https://www.scopus.com/inward/record.uri?eid=2-s2.0-85170042602&doi=10.7717%2fpeerj.15762&partnerID=40&md5=eb6e369eb99959894c41daba1bce043a	The Brazilian Atlantic Forest and its associated ecosystems are highly biodiverse but still understudied, especially with respect to eukaryotic microbes. Protists represent the largest proportion of eukaryotic diversity and play important roles in nutrient cycling and maintenance of the ecosystems in which they occur. However, much of protist diversity remains unknown, particularly in the Neotrop…	Coastal lagoons; DNA metabarcoding; Eukaryotic diversity; Inland ecosystems; Neotropics; Protist diversity; South America	RNA 18S; Amoebozoa; aquatic environment; Archaeplastida; Article; bioinformatics; ciliate; Cryptophyta; diatom; DNA extraction; fluorometry; forest; freshwater environment; functional diversity; high throughput sequencing; lagoon; microbial community; microbial diversity; Neotropics; nonhuman; nutrient cycling; Oomycetes; Plasmodiophorida; polymerase chain reaction; population abundance; principa…	English	Article	Final	All Open Access; Gold Open Access; Green Open Access	Scopus	2-s2.0-85170042602
Sun S.; Su Y.; Chen S.; Cui W.; Zhao C.; Liu Q.	Sun, Shuo (57204003458); Su, Yuhua (57442168400); Chen, Shuiquan (57203909929); Cui, Wu (57442047800); Zhao, Chaocheng (10244650200); Liu, Qiyou (15019328500)	57204003458; 57442168400; 57203909929; 57442047800; 10244650200; 15019328500	Bioremediation of oil-contaminated soil: Exploring the potential of endogenous hydrocarbon degrader Enterobacter sp. SAVR S-1	2022	Applied Soil Ecology	19	10.1016/j.apsoil.2022.104387	https://www.scopus.com/inward/record.uri?eid=2-s2.0-85124139015&doi=10.1016%2fj.apsoil.2022.104387&partnerID=40&md5=7d0014b0f0fbd72016fb531a50c2f3e4	Enterobacter is commonly found in oil-contaminated soil and plays a vital role in environmental bioremediation. This paper selected Enterobacter sp. SAVR S-1 as a representative to study the degradation potential at different concentrations of Total petroleum hydrocarbon (TPH) in soil during bioremediation. Genomic analysis indicated that genes involved in the metabolism of aromatic compounds (pa…	Bioaugmentation; Enterobacter sp. SAVR S-1; Functional genes; Microbial community; Oil-contamination soil; TPH		English	Article	Final		Scopus	2-s2.0-85124139015
Gupta K.; Biswas R.; Sarkar A.	Gupta, Kriti (57210542484); Biswas, Rimi (57202443589); Sarkar, Angana (55514801400)	57210542484; 57202443589; 55514801400	Advancement of omics: Prospects for bioremediation of contaminated soils	2020	Microbial Bioremediation & Biodegradation	17	10.1007/978-981-15-1812-6_5	https://www.scopus.com/inward/record.uri?eid=2-s2.0-85088429711&doi=10.1007%2f978-981-15-1812-6_5&partnerID=40&md5=99cd0b654a5c2d5b2305c1da08a9cc16	The soil is a complex mixture of organic matter and minerals, supporting a discrete array of life. Severely polluted soils have been detoxified using a variety of microorganisms. Bioremediation is a process of removal of environmental contaminants utilizing microbes through a variety of enzymatic processes. In situ processing, high public acceptance, and a comparatively lower cost hasten the over…	Bioremediation; Contaminants; Mineralization; Omic tool; Soil		English	Book chapter	Final		Scopus	2-s2.0-85088429711
Liu Q.; Sun S.; Chen S.; Su Y.; Wang Y.; Tang F.; Zhao C.; Li L.	Liu, Qiyou (15019328500); Sun, Shuo (57204003458); Chen, Shuiquan (57203909929); Su, Yuhua (57442168400); Wang, Yaru (57882032700); Tang, Fang (57882032800); Zhao, Chaocheng (10244650200); Li, Lin (57882032600)	15019328500; 57204003458; 57203909929; 57442168400; 57882032700; 57882032800; 10244650200; 57882032600	A novel dehydrocoenzyme activator combined with a composite microbial agent TY for enhanced bioremediation of crude oil-contaminated soil	2023	Journal of Environmental Management	6	10.1016/j.jenvman.2023.117246	https://www.scopus.com/inward/record.uri?eid=2-s2.0-85146271897&doi=10.1016%2fj.jenvman.2023.117246&partnerID=40&md5=b7d6b2c6a7fd827aabb151b63b6905d6	Bioaugmentation (BA) and biostimulation (BS) synergistic remediation is an effective remediation strategy for oil-contaminated soil. In this study, the optimal combination system of composite microbial agent TY (Achromobacter: Pseudomona = 2:1) and dehydrocoenzyme activator (NaNO3 (7.0 g/L), (NH4)2HPO4 (1.0 g/L), riboflavin (6.0 mg/L)) was screened. Under the best combination system, the degradat…	Activation agent; Biodegradation; Compound bacteria; Microbial community; Soil pollution	Biodegradation, Environmental; Hydrocarbons; Oxidoreductases; Petroleum; Phylogeny; Pseudomonas; Soil; Soil Microbiology; Soil Pollutants; Biodegradation; Bioremediation; Biotechnology; Contamination; Crude oil; Degradation; Fatty acids; Gas chromatography; Soil pollution; Soils; ABC transporter; aromatic compound; dioxygenase; fatty acid; flavine adenine nucleotide; nanochain; nicotinamide adeni…	English	Article	Final		Scopus	2-s2.0-85146271897
Idris M.O.; Kim H.-C.; Yaqoob A.A.; Ibrahim M.N.M.	Idris, Mustapha Omenesa (57552650500); Kim, Hyun-Chul (56813226200); Yaqoob, Asim Ali (57212150395); Ibrahim, Mohamad Nasir Mohamad (55909512200)	57552650500; 56813226200; 57212150395; 55909512200	Exploring the effectiveness of microbial fuel cell for the degradation of organic pollutants coupled with bio-energy generation	2022	Sustainable Energy Technologies and Assessments	46	10.1016/j.seta.2022.102183	https://www.scopus.com/inward/record.uri?eid=2-s2.0-85127167686&doi=10.1016%2fj.seta.2022.102183&partnerID=40&md5=b3c5d983df4f209430b073beae6c7d7f	The ongoing global industrialization has contributed in a significant increase in the release of toxic pollutants into the environment, the majority of which are primarily organic pollutions. When organic pollutants more than permissible limits are in the environment, they pose a serious threat to aquatic life and humans. Various bioremediation and degradation techniques for organic pollutants re…	Biodegradation; Bioenergy; Microbial fuel cell; Organic pollutants	Bioremediation; Microbial fuel cells; Organic pollutants; Sustainable development; Aquatic life; Bio-energy; Biological factors; Energy generations; Industrialisation; Organic pollution; Performance; Physico-chemical factors; Pollutants removal; Toxic pollutants; biodegradation; bioenergy; fuel cell; organic pollutant; removal experiment; sustainability; sustainable development; Biodegradation	English	Article	Final		Scopus	2-s2.0-85127167686
Rodrigues E.M.; Kalks K.H.M.; Tótola M.R.	Rodrigues, Edmo M. (56549532300); Kalks, Karlos H.M. (55772711300); Tótola, Marcos R. (8663984300)	56549532300; 55772711300; 8663984300	Prospect, isolation, and characterization of microorganisms for potential use in cases of oil bioremediation along the coast of Trindade Island, Brazil	2015	Journal of Environmental Management	36	10.1016/j.jenvman.2015.03.016	https://www.scopus.com/inward/record.uri?eid=2-s2.0-84924754615&doi=10.1016%2fj.jenvman.2015.03.016&partnerID=40&md5=71c89c7f092389c45370ef0f110b2821	In the present study, acrylic coupons with a thin layer of oil on the surface were incubated in the coastal water of Trindade Island, Brazil, for 60 days. The microorganisms adhered to the coupons were isolated using enrichment medium with hexadecane and naphthalene as the sole carbon and energy source. A total of 15 bacterial isolates were obtained, and the ability of these isolates to use diffe…	Bioremediation; Hydrocarbon degradation; Ocean contamination; Pristine environment	Actinobacteria; Biodegradation, Environmental; Brazil; DNA Primers; Hydrocarbons; Molecular Sequence Data; Naphthalenes; Polycyclic Hydrocarbons, Aromatic; Polymerase Chain Reaction; Pyrenes; Rhodococcus; RNA, Ribosomal, 16S; Tropical Climate; Water Microbiology; Water Pollutants, Chemical; Trindade; Actinobacteria; Alphaproteobacteria; Bacteria (microorganisms); Firmicutes; Nocardia farcinica; R…	English	Article	Final	All Open Access; Green Open Access	Scopus	2-s2.0-84924754615

## Sheet: Web of Science
PT	AU	BA	BE	GP	AF	BF	CA	TI	SO	SE	BS	LA	DT	CT	CY	CL	SP	HO	DE	ID	AB	C1	C3	RP	EM	RI	OI	FU	FP	FX	CR	NR	TC	Z9	U1	U2	PU	PI	PA	SN	EI	BN	J9	JI	PD	PY	VL	IS	PN
J	Rodrigues, EM; Morais, DK; Pylro, VS; Redmile-Gordon, M; de Oliveira, JA; Roesch, LFW; Cesar, DE; Tótola, MR				Rodrigues, Edmo Montes; Morais, Daniel Kumazawa; Pylro, Victor Satler; Redmile-Gordon, Marc; de Oliveira, Juraci Alves; Wurdig Roesch, Luiz Fernando; Cesar, Dioneia Evangelista; Totola, Marcos Rogerio			Aliphatic Hydrocarbon Enhances Phenanthrene Degradation by Autochthonous Prokaryotic Communities from a Pristine Seawater	MICROBIAL ECOLOGY			English	Article						Hydrocarbon biodegradation; Pristine environment; Hydrocarbonoclastic bacteria; Metagenomics; Microbial ecology; Trindade Island	POLYCYCLIC AROMATIC-HYDROCARBONS; HORIZON OIL-SPILL; GULF-OF-MEXICO; DEGRADING BACTERIA; SP NOV.; BIOREMEDIATION STRATEGIES; MICROBIAL COMMUNITIES; SURFACE SEDIMENTS; TRINDADE ISLAND; MARINE	The microbial diversity and functioning around oceanic islands is poorly described, despite its importance for ecosystem homeostasis. Here, we aimed to verify the occurrence of microbe-driven phenanthrene co-oxidation in the seawater surrounding the Trindade Island (Brazil). We also used Next-Generation Sequencing to evaluate the effects of aliphatic and polycyclic aromatic hydrocarbons (PAHs) on…	[Rodrigues, Edmo Montes; Totola, Marcos Rogerio] Univ Fed Vicosa, Dept Microbiol, Lab Biotecnol & Biodiversidade Meio Ambiente, Vicosa, MG, Brazil; [Morais, Daniel Kumazawa] Czech Inst Sci CAS, Inst Microbiol, Lab Environm Microbiol, Prague, Czech Republic; [Pylro, Victor Satler] Luiz de Queiroz Coll Agr, Dept Soil Sci, Soil Microbiol Lab, ESALQ USP, Sao Paulo, Brazil; [Redmile-Gordon, Marc] Roth…	Universidade Federal de Vicosa; Czech Academy of Sciences; Institute of Microbiology of the Czech Academy of Sciences; Universidade de Sao Paulo; UK Research & Innovation (UKRI); Biotechnology and Biological Sciences Research Council (BBSRC); Rothamsted Research; Universidade Federal de Vicosa; Universidade Federal do Pampa; Universidade Federal de Juiz de Fora	Rodrigues, EM (corresponding author), Univ Fed Vicosa, Dept Microbiol, Lab Biotecnol & Biodiversidade Meio Ambiente, Vicosa, MG, Brazil.	edmomontes@yahoo.com.br; totolaufv@gmail.com	Pylro, Victor Satler/G-6045-2010; Morais, Daniel Kumazawa/I-3551-2019; Rodrigues, Edmo/O-1967-2015; redmile-gordon, marc/HGD-8687-2022; Cesar, Dionéia Evangelista/V-5038-2019; Oliveira, Juraci/AAF-5087-2020; Roesch, Luiz/GRS-4638-2022	Pylro, Victor Satler/0000-0003-2154-9150; Morais, Daniel Kumazawa/0000-0003-3328-7848; Rodrigues, Edmo/0000-0003-0234-9890; redmile-gordon, marc/0000-0002-8448-1942; Roesch, Luiz/0000-0003-1450-8828; Oliveira, Juraci/0000-0003-0150-2291	National Council for Scientific and Technological Development (Conselho Nacional de Desenvolvimento Cientifico e Tecnologico/CNPq) [405544/2012-0, 010645/2013-6]; FAPEMIG; CAPES; FAPESP [2016/02219-8]; Brazilian Microbiome Project; National Institute of Science and Technology: Microbiome; Fundacao de Amparo a Pesquisa do Estado de Sao Paulo (FAPESP) [16/02219-8] Funding Source: FAPESP	National Council for Scientific and Technological Development (Conselho Nacional de Desenvolvimento Cientifico e Tecnologico/CNPq)(Conselho Nacional de Desenvolvimento Cientifico e Tecnologico (CNPQ)); FAPEMIG(Fundacao de Amparo a Pesquisa do Estado de Minas Gerais (FAPEMIG)); CAPES(Coordenacao de Aperfeicoamento de Pessoal de Nivel Superior (CAPES)); FAPESP(Fundacao de Amparo a Pesquisa do Estad…	We would like to thank the Brazilian Navy, Captain Rodrigo Otoch Chaves and Captain Sidnei da Costa Abrantes for the logistic support while collecting samples. This work was supported by the National Council for Scientific and Technological Development (Conselho Nacional de Desenvolvimento Cientifico e Tecnologico/CNPq) which provided all approvals and permits (project grant number 405544/2012-0 …		83	11	12	2	46	SPRINGER	NEW YORK	ONE NEW YORK PLAZA, SUITE 4600, NEW YORK, NY, UNITED STATES	0095-3628	1432-184X		MICROB ECOL	Microb. Ecol.	APR	2018	75	3
[truncated: 21 more columns]

## Sheet: PubMed
PMID	Title	Authors	Citation	First Author	Journal/Book	Publication Year	Create Date	PMCID	NIHMS ID	DOI
26925341	Responses of microbial community from tropical pristine coastal soil to crude oil contamination	Morais D Pylro V Clark IM Hirsch PR Tótola MR.	PeerJ. 2016 Feb 18;4:e1733. doi: 10.7717/peerj.1733. eCollection 2016.	Morais D	PeerJ	2016	2016-03-01	PMC4768689		10.7717/peerj.1733
28971238	Aliphatic Hydrocarbon Enhances Phenanthrene Degradation by Autochthonous Prokaryotic Communities from a Pristine Seawater	Rodrigues EM Morais DK Pylro VS Redmile-Gordon M de Oliveira JA Roesch LFW Cesar DE Tótola MR.	Microb Ecol. 2018 Apr;75(3):688-700. doi: 10.1007/s00248-017-1078-8. Epub 2017 Oct 3.	Rodrigues EM	Microb Ecol	2018	2017-10-04			10.1007/s00248-017-1078-8

## Sheet: PubMed Central
PMC	PMC4474894
PMID	26090804
IS	1932-6203 (Electronic)
VI	10
IP	6
DP	2015
TI	Baseline Assessment of Mesophotic Reefs of the Vitória-Trindade Seamount Chain
	Based on Water Quality, Microbial Diversity, Benthic Cover and Fish Biomass Data.
LID	e0130084
AB	Seamounts are considered important sources of biodiversity and minerals. However,
	their biodiversity and health status are not well understood; therefore,
	potential conservation problems are unknown. The mesophotic reefs of the
	Vitória-Trindade Seamount Chain (VTC) were investigated via benthic community and
	fish surveys, metagenomic and water chemistry analyses, and water microbial
	abundance estimations. The VTC is a mosaic of reef systems and includes fleshy
	algae dominated rhodolith beds, crustose coralline algae (CCA) reefs, and turf
	algae dominated rocky reefs of varying health levels. Macro-carnivores and larger
	fish presented higher biomass at the CCA reefs (4.4 kg per frame) than in the
	rhodolith beds and rocky reefs (0.0 to 0.1 kg per frame). A larger number of
	metagenomic sequences identified as primary producers (e.g., Chlorophyta and
	Streptophyta) were found at the CCA reefs. However, the rocky reefs contained
	more diseased corals (>90%) than the CCA reefs (~40%) and rhodolith beds (~10%).
	Metagenomic analyses indicated a heterotrophic and fast-growing microbiome in
	rocky reef corals that may possibly lead to unhealthy conditions possibly
	enhanced by environmental features (e.g. light stress and high loads of labile
	dissolved organic carbon). VTC mounts represent important hotspots of
	biodiversity that deserve further conservation actions.
FAU	Meirelles, Pedro M.
AU	Meirelles PM
AD	Institute of Biology and SAGE-COPPE, Federal University of Rio de Janeiro (UFRJ),
	Rio de Janeiro, Brazil
FAU	Amado-Filho, Gilberto M.
AU	Amado-Filho GM
AD	Rio de Janeiro Botanical Garden Research Institute (IP-JBRJ), Rio de Janeiro,
	Brazil
FAU	Pereira-Filho, Guilherme H.
AU	Pereira-Filho GH
AD	Institute of Marine Sciences, Federal University of São Paulo (UNIFESP), Santos,
	Brazil
FAU	Pinheiro, Hudson T.
AU	Pinheiro HT
AD	Department of Ichthyology, California Academy of Sciences, San Francisco, CA,
	United States of America
FAU	de Moura, Rodrigo L.
AU	de Moura RL
AD	Institute of Biology and SAGE-COPPE, Federal University of Rio de Janeiro (UFRJ),
	Rio de Janeiro, Brazil
FAU	Joyeux, Jean-Christophe
AU	Joyeux JC
AD	Department of Oceanography and Ecology, Federal University of Espírito Santo,
	Vitória, Espírito Santo, Brazil
FAU	Mazzei, Eric F.
AU	Mazzei EF
AD	Department of Oceanography and Ecology, Federal University of Espírito Santo,
	Vitória, Espírito Santo, Brazil
FAU	Bastos, Alex C.
AU	Bastos AC
AD	Department of Oceanography and Ecology, Federal University of Espírito Santo,
	Vitória, Espírito Santo, Brazil
FAU	Edwards, Robert A.
AU	Edwards RA
AD	Institute of Biology and SAGE-COPPE, Federal University of Rio de Janeiro (UFRJ),
	Rio de Janeiro, Brazil
FAU	Dinsdale, Elizabeth
AU	Dinsdale E
AD	Institute of Biology and SAGE-COPPE, Federal University of Rio de Janeiro (UFRJ),
	Rio de Janeiro, Brazil
FAU	Paranhos, Rodolfo
AU	Paranhos R
AD	Institute of Biology and SAGE-COPPE, Federal University of Rio de Janeiro (UFRJ),
	Rio de Janeiro, Brazil
FAU	Santos, Eidy O.
AU	Santos EO
AD	Division of Metrology Applied to Life Science (DIMAV), National Institute of
	Technology, Quality and Metrology (INMETRO), Rio de Janeiro, Brazil
FAU	Iida, Tetsuya
AU	Iida T
AD	Laboratory of Genomic Research on Pathogenic Bacteria, International Research
	Center for Infectious Diseases, Research Institute for Microbial Diseases, Osaka
	University, Suita, Japan
FAU	Gotoh, Kazuyoshi
AU	Gotoh K
AD	Department of Infection Metagenomics, Genome Information Research Center,
	Research Institute for Microbial Diseases, Osaka University, Suita, Japan
FAU	Nakamura, Shota
AU	Nakamura S
AD	Department of Infection Metagenomics, Genome Information Research Center,
	Research Institute for Microbial Diseases, Osaka University, Suita, Japan
FAU	Sawabe, Tomoo
AU	Sawabe T
AD	Laboratory of Microbiology, Faculty of Fisheries Sciences, Hokkaido University,
	3-1-1 Minato-cho, Hakodate 041, Japan
FAU	Rezende, Carlos E.
AU	Rezende CE
AD	Environmental Sciences Laboratory (LCA), Universidade Estadual do Norte
	Fluminense (UENF), Campos dos Goytacazes, Brazil
FAU	Gadelha, Luiz M. R.
AU	Gadelha LMR
AD	National Laboratory for Scientific Computing (LNCC), Petrópolis, Rio de Janeiro,
	Brazil
FAU	Francini-Filho, Ronaldo B.
AU	Francini-Filho RB
AD	Department of Environment and Engineering, Federal University of Paraíba, Rio
	Tinto, Brazil
FAU	Thompson, Cristiane
AU	Thompson C
AD	Institute of Biology and SAGE-COPPE, Federal University of Rio de Janeiro (UFRJ),
	Rio de Janeiro, Brazil
FAU	Thompson, Fabiano L.
AU	Thompson FL
AD	Institute of Biology and SAGE-COPPE, Federal University of Rio de Janeiro (UFRJ),
	Rio de Janeiro, Brazil
LA	eng
PT	Journal Article
DEP	20150619
PHST	2014/11/17 [received]
PHST	2015/05/15 [accepted]
TA	PLoS One
JT	PLoS ONE
AID	10.1371/journal.pone.0130084 [doi]
AID	PONE-D-14-51760 [pii]
SO	PLoS One. 2015 Jun 19;10(6):. doi:10.1371/journal.pone.0130084.
PMC	PMC4777766
PMID	26941155
IS	2169-8287 (Electronic)
VI	4
IP	2
DP	2016 Mar-Apr
TI	Draft Genome of Rhodococcus rhodochrous TRN7, Isolated from the Coast of Trindade
	Island, Brazil.
LID	e01707-15
AB	Here, we present a draft genome and annotation of Rhodococcus rhodochrous TRN7,
	isolated from Trindade Island, Brazil, which will provide genetic data to benefit
	the understanding of its metabolism.
FAU	Rodrigues, Edmo M.
AU	Rodrigues EM
AD	Departamento de Microbiologia, Laboratório de Biotecnologia e Biodiversidade para
	o Meio Ambiente, Universidade Federal de Viçosa, Viçosa, Minas Gerais, Brazil
FAU	Pylro, Victor S.
AU	Pylro VS
AD	René Rachou Research Centre, Genomics and Computational Biology Group
	CPqRR/FIOCRUZ, Belo Horizonte, Minas Gerais, Brazil
FAU	Dobbler, Priscila T.
AU	Dobbler PT
AD	Centro Interdisciplinar de Pesquisas em Biotecnologia, CIP-Biotec, Campus São
	Gabriel, Universidade Federal do Pampa, São Gabriel, Rio Grande do Sul, Brazil
FAU	Victoria, Filipe
AU	Victoria F
AD	Núcleo de Estudos da Vegetação Antártica, Campus São Gabriel, Universidade
	Federal do Pampa, São Gabriel, Rio Grande do Sul, Brazil
FAU	Roesch, Luiz F. W.
AU	Roesch LFW
AD	Centro Interdisciplinar de Pesquisas em Biotecnologia, CIP-Biotec, Campus São
	Gabriel, Universidade Federal do Pampa, São Gabriel, Rio Grande do Sul, Brazil
FAU	Tótola, Marcos R.
AU	Tótola MR
AD	Departamento de Microbiologia, Laboratório de Biotecnologia e Biodiversidade para
	o Meio Ambiente, Universidade Federal de Viçosa, Viçosa, Minas Gerais, Brazil
LA	eng
PT	Journal Article
DEP	20160303
GR	405544/2012-0
PHST	2015/12/15 [received]
PHST	2016/01/08 [accepted]
TA	Genome Announc
JT	Genome Announcements
AID	genomeA01707-15 [pii]
AID	10.1128/genomeA.01707-15 [doi]
SO	Genome Announc. 2016 Mar 3;4(2):. doi:10.1128/genomeA.01707-15.
PMC	PMC7059795
PMID	29050374
IS	2047-217X (Electronic)
VI	6
IP	10
DP	2017 Oct
TI	Taxonomic structure and functional association of foxtail millet root microbiome.
PG	2024-12-01
AB	The root microbes play pivotal roles in plant productivity, nutrient uptakes, and
	disease resistance. The root microbial community structure has been extensively
	investigated by 16S/18S/ITS amplicons and metagenomic sequencing in crops and
	model plants. However, the functional associations between root microbes and host
	plant growth are poorly understood. This work investigates the root bacterial
	community of foxtail millet (Setaria italica) and its potential effects on host
	plant productivity. We determined the bacterial composition of 2882 samples from
	foxtail millet rhizoplane, rhizosphere and corresponding bulk soils from 2
	well-separated geographic locations by 16S rRNA gene amplicon sequencing. We
	identified 16 109 operational taxonomic units (OTUs), and defined 187 OTUs as
	shared rhizoplane core OTUs. The β-diversity analysis revealed that microhabitat
	was the major factor shaping foxtail millet root bacterial community, followed by
	geographic locations. Large-scale association analysis identified the potential
	beneficial bacteria correlated with plant high productivity. Besides, the
	functional prediction revealed specific pathways enriched in foxtail millet
	rhizoplane bacterial community. We systematically described the root bacterial
	community structure of foxtail millet and found its core rhizoplane bacterial
	members. Our results demonstrated that host plants enrich specific bacteria and
	functions in the rhizoplane. The potentially beneficial bacteria may serve as a
	valuable knowledge foundation for bio-fertilizer development in agriculture.
FAU	Jin, Tao
AU	Jin T
AD	BGI-Qingdao, Qingdao, 266510, China
FAU	Wang, Yayu
AU	Wang Y
AD	BGI-Qingdao, Qingdao, 266510, China
FAU	Huang, Yueying
AU	Huang Y
AD	BGI-Qingdao, Qingdao, 266510, China
FAU	Xu, Jin
AU	Xu J
AD	BGI-Qingdao, Qingdao, 266510, China
FAU	Zhang, Pengfan
AU	Zhang P
AD	BGI-Qingdao, Qingdao, 266510, China
FAU	Wang, Nian
AU	Wang N
AD	Citrus Research and Education Center, Department of Microbiology and Cell
	Science, IFAS, University of Florida, Lake Alfred, FL, USA
FAU	Liu, Xin
AU	Liu X
AD	BGI-Qingdao, Qingdao, 266510, China
FAU	Chu, Haiyan
AU	Chu H
AD	State Key Laboratory of Soil and Sustainable Agriculture, Institute of Soil
	Science, Chinese Academy of Sciences, East Beijing Road 71, Nanjing, 210008,
	China
FAU	Liu, Guang
AU	Liu G
AD	BGI-Qingdao, Qingdao, 266510, China
FAU	Jiang, Honggang
AU	Jiang H
AD	BGI-Qingdao, Qingdao, 266510, China
FAU	Li, Yuzhen
AU	Li Y
AD	BGI-Qingdao, Qingdao, 266510, China
FAU	Xu, Jing
AU	Xu J
AD	BGI-Qingdao, Qingdao, 266510, China
FAU	Kristiansen, Karsten
AU	Kristiansen K
AD	BGI-Qingdao, Qingdao, 266510, China
FAU	Xiao, Liang
AU	Xiao L
AD	BGI-Qingdao, Qingdao, 266510, China
FAU	Zhang, Yunzeng
AU	Zhang Y
AD	Citrus Research and Education Center, Department of Microbiology and Cell
	Science, IFAS, University of Florida, Lake Alfred, FL, USA
FAU	Zhang, Gengyun
AU	Zhang G
AD	BGI-Qingdao, Qingdao, 266510, China
FAU	Du, Guohua
AU	Du G
AD	BGI-Qingdao, Qingdao, 266510, China
FAU	Zhang, Houbao
AU	Zhang H
AD	BGI-Qingdao, Qingdao, 266510, China
FAU	Zou, Hongfeng
AU	Zou H
AD	BGI-Qingdao, Qingdao, 266510, China
FAU	Zhang, Haifeng
AU	Zhang H
AD	BGI-Qingdao, Qingdao, 266510, China
FAU	Jie, Zhuye
AU	Jie Z
AD	BGI-Qingdao, Qingdao, 266510, China
FAU	Liang, Suisha
AU	Liang S
AD	BGI-Qingdao, Qingdao, 266510, China
FAU	Jia, Huijue
AU	Jia H
AD	BGI-Qingdao, Qingdao, 266510, China
FAU	Wan, Jingwang
AU	Wan J
AD	BGI-Qingdao, Qingdao, 266510, China
FAU	Lin, Dechun
AU	Lin D
AD	BGI-Qingdao, Qingdao, 266510, China
FAU	Li, Jinying
AU	Li J
AD	BGI-Qingdao, Qingdao, 266510, China
FAU	Fan, Guangyi
AU	Fan G
AD	BGI-Qingdao, Qingdao, 266510, China
FAU	Yang, Huanming
AU	Yang H
AD	BGI-Qingdao, Qingdao, 266510, China
FAU	Wang, Jian
AU	Wang J
AD	BGI-Qingdao, Qingdao, 266510, China
FAU	Bai, Yang
AU	Bai Y
AD	State Key Laboratory of Plant Genomics, Institute of Genetics and Developmental
	Biology, Chinese Academy of Science, Beijing, 100101, China
FAU	Xu, Xun
AU	Xu X
AD	BGI-Qingdao, Qingdao, 266510, China
LA	eng
PT	Journal Article
DEP	20170905
GR	U1301252
PHST	2017/08/28 [accepted]
PHST	2016/10/20 [received]
PHST	2017/02/21 [revised]
TA	Gigascience
JT	GigaScience
AID	10.1093/gigascience/gix089 [doi]
AID	gix089 [pii]
SO	Gigascience. 2017 Sep 05;6(10):1-12. doi:10.1093/gigascience/gix089.
PMC	PMC10402703
PMID	37547721
IS	2167-8359 (Electronic)
VI	11
DP	2023
TI	Protist taxonomic and functional diversity in aquatic ecosystems of the Brazilian
	Atlantic Forest.
LID	e15762
AB	The Brazilian Atlantic Forest and its associated ecosystems are highly biodiverse
	but still understudied, especially with respect to eukaryotic microbes. Protists
	represent the largest proportion of eukaryotic diversity and play important roles
	in nutrient cycling and maintenance of the ecosystems in which they occur.
	However, much of protist diversity remains unknown, particularly in the
	Neotropics. Understanding the taxonomic and functional diversity of these
	organisms is urgently needed, not only to fill this gap in our knowledge, but
	also to enable the development of public policies for biological conservation.
	This is the first study to investigate the taxonomic and trophic diversity of the
	major protist groups in freshwater systems and brackish coastal lagoons located
	in fragments of the Brazilian Atlantic Forest by DNA metabarcoding, using
	high-throughput sequencing of the gene coding for the V4 region of the 18S rRNA
	gene. We compared α and β diversity for all protist communities and assessed the
	relative abundance of phototrophic, consumer, and parasitic taxa. We found that
	the protist communities of coastal lagoons are as diverse as the freshwater
	systems studied in terms of α diversity, although differed significantly in terms
	of taxonomic composition. Our results still showed a notable functional
	homogeneity between the trophic groups in freshwater environments. Beta diversity
	was higher among freshwater samples, suggesting a greater level of heterogeneity
	within this group of samples concerning the composition and abundance of
	OTUs.Ciliophora was the most represented group in freshwater, while Diatomea
	dominated diversity in coastal lagoons.
FAU	Carvalho da Silva, Vanessa
AU	Carvalho da Silva V
FAU	Fernandes, Noemi
AU	Fernandes N
AUID	ORCID: 0000-0002-3332-1869
LA	eng
PT	Journal Article
DEP	20230801
GR	E-202.325/2018
PHST	2023/04/17 [received]
PHST	2023/06/27 [accepted]
TA	PeerJ
JT	PeerJ
AID	15762 [pii]
AID	10.7717/peerj.15762 [doi]
SO	PeerJ. 2023 Aug 1;11:. doi:10.7717/peerj.15762.
PMC	PMC8125633
PMID	34062889
IS	1420-3049 (Electronic)
VI	26
IP	9
DP	2021 May
TI	Microbiological Study in Petrol-Spiked Soil.
LID	2664
AB	The pollution of arable lands and water with petroleum-derived products is still
	a valid problem, mainly due the extensive works aimed to improve their production
	technology to reduce fuel consumption and protect engines. An example of the
	upgraded fuels is the BP 98 unleaded petrol with Active technology. A pot
	experiment was carried out in which Eutric Cambisol soil was polluted with petrol
	to determine its effect on the microbiological and biochemical properties of this
	soil. Analyses were carried out to determine soil microbiome composition—with the
	incubation and metagenomic methods, the activity of seven enzymes, and cocksfoot
	effect on hydrocarbon degradation. The following indices were determined: colony
	development index (CD); ecophysiological diversity index (EP); index of cocksfoot
	effect on soil microorganisms and enzymes (IFG); index of petrol effect on soil
	microorganisms and enzymes (IFP); index of the resistance of microorganisms,
	enzymes, and cocksfoot to soil pollution with petrol (RS); Shannon–Weaver’s index
	of bacterial taxa diversity (H); and Shannon–Weaver’s index of hydrocarbon
	degradation (IDH). The soil pollution with petrol was found to increase
	population numbers of bacteria and fungi, and Protebacteria phylum abundance as
	well as to decrease the abundance of Actinobacteria and Acidobacteria phyla. The
	cultivation of cocksfoot on the petrol-polluted soil had an especially beneficial
	effect mainly on the bacteria belonging to the Ramlibacter, Pseudoxanthomonas,
	Mycoplana, and Sphingobium genera. The least susceptible to the soil pollution
	with petrol and cocksfoot cultivation were the bacteria of the following genera:
	Kaistobacter, Rhodoplanes, Bacillus, Streptomyces, Paenibacillus,
	Phenylobacterium, and Terracoccus. Cocksfoot proved effective in the
	phytoremediation of petrol-polluted soil, as it accelerated hydrocarbon
	degradation and increased the genetic diversity of bacteria. It additionally
	enhanced the activities of soil enzymes.
FAU	Borowik, Agata
AU	Borowik A
AUID	ORCID: https://orcid.org/0000-0002-8512-7363
FAU	Wyszkowska, Jadwiga
AU	Wyszkowska J
AUID	ORCID: https://orcid.org/0000-0002-2156-3780
FAU	Kucharski, Jan
AU	Kucharski J
AUID	ORCID: https://orcid.org/0000-0002-6364-6357
LA	eng
PT	Journal Article
DEP	20210501
PHST	2021/04/09 [received]
PHST	2021/04/30 [accepted]
TA	Molecules
JT	Molecules
AID	10.3390/molecules26092664 [doi]
AID	molecules-26-02664 [pii]
SO	Molecules. 2021 May 01;26(9):. doi:10.3390/molecules26092664.
PMC	PMC9022567
PMID	35286159
IS	2576-098X (Electronic)
VI	11
IP	4
TI	Whole-Genome Shotgun (WGS) Sequence of cis-Isoprene Polymer-Degrading Nocardia
	sp. strain BSTN01.
LID	e01175-21
AB	Species belonging to the genus Nocardia are known to be facultative human
	pathogens. There are also reports of Nocardia species capable of degrading
	various forms of rubber. Here, we report the whole-genome shotgun (WGS) sequence
	of Nocardia sp. strain BSTN01, isolated from stored water in latex-collecting
	cups thrown away near a local rubber processing unit in Tripura, India.
FAU	Sarkar, Biraj
AU	Sarkar B
AD	Laboratory of Molecular Bacteriology, Department of Microbiology, University of
	Calcutta, Kolkata, India
FAU	Mandal, Amit Kumar
AU	Mandal AK
AUID	ORCID: https://orcid.org/0000-0001-9249-5052
AD	Chemical Biology Laboratory, Department of Sericulture, Raiganj University, North
	Dinajpur, West Bengal, India
FAU	Ghati, Amit
AU	Ghati A
AD	Department of Microbiology, Barrackpore Rastraguru Surendranath College, Kolkata,
	India
FAU	Ghosh, Pranab
AU	Ghosh P
AD	Department of Chemistry, University of North Bengal, Darjeeling, West Bengal,
	India
FAU	Mandal, Sukhendu
AU	Mandal S
AD	Laboratory of Molecular Bacteriology, Department of Microbiology, University of
	Calcutta, Kolkata, India
FAU	Kati, Ahmet
AU	Kati A
AUID	ORCID: https://orcid.org/0000-0002-9903-634X
AD	Experimental Medicine Research and Application Center, University of Health
	Sciences Turkey, Uskudar, Istanbul, Turkey
LA	eng
PT	Journal Article
PHST	2021/12/08 [received]
PHST	2022/02/27 [accepted]
TA	Microbiol Resour Announc
JT	Microbiology Resource Announcements
AID	MRA01175-21 [pii]
AID	10.1128/mra.01175-21 [doi]
AID	mra.01175-21 [pii]
SO	Microbiol Resour Announc. ;11(4):. doi:10.1128/mra.01175-21.
PMC	PMC8237827
PMID	34239781
IS	2167-8359 (Electronic)
VI	9
DP	2021
TI	Feasibility of melting fingerprint obtained from ISSR-HRM curves for marine
	mammal species identification.
LID	e11689
AB	Currently, species identification of stranded marine mammals mostly relies on
	morphological features, which has inherent challenges. The use of genetic
	information for marine mammal species identification remains limited, therefore,
	new approaches that can contribute to a better monitoring of stranded species are
	needed. In that context, the ISSR-HRM method we have proposed offers a new
	approach for marine mammal species identification. Consequently, new approaches
	need to be developed to identify individuals at the species level. Eight primers
	of the ISSR markers were chosen for HRM analysis resulting in ranges of accuracy
	of 56.78–75.50% and 52.14–75.93% in terms of precision, while a degree of
	sensitivity of more than 80% was recorded when each single primer was used. The
	ISSR-HRM primer combinations revealed a success rate of 100% in terms of
	discrimination for all marine mammals included in this study. Furthermore,
	ISSR-HRM analysis was successfully employed in determining marine mammal
	discrimination among varying marine mammal species. Thus, ISSR-HRM analysis could
	serve as an effective alternative tool in the species identification process.
	This option would offer researchers a heightened level of convenience in terms of
	its performance and success rate. It would also offer field practice to
	veterinarians, biologists and other field-related people a greater degree of ease
	with which they could interpret results when effectively classifying stranded
	marine mammals. However, further studies with more samples and with a broader
	geographical scope will be required involving distinct populations to account for
	the high degree of intraspecific variability in cetaceans and to demonstrate the
	range of applications of this approach.
FAU	Kriangwanich, Wannapimol
AU	Kriangwanich W
AD	Department of Veterinary Biosciences and Public Health, Faculty of Veterinary
	Medicine, Chiang Mai University, Chiang Mai, Thailand
FAU	Buddhachat, Kittisak
AU	Buddhachat K
AUID	ORCID: 0000-0003-4746-9861
AD	Excellence Center in Veterinary Bioscience, Chiang Mai University, Chiang Mai,
	Thailand
FAU	Poommouang, Anocha
AU	Poommouang A
AD	Department of Veterinary Biosciences and Public Health, Faculty of Veterinary
	Medicine, Chiang Mai University, Chiang Mai, Thailand
FAU	Chomdej, Siriwadee
AU	Chomdej S
AD	Excellence Center in Veterinary Bioscience, Chiang Mai University, Chiang Mai,
	Thailand
FAU	Thitaram, Chatchote
AU	Thitaram C
AUID	ORCID: 0000-0001-9319-5596
AD	Center of Elephant and Wildlife Health, Faculty of Veterinary Medicine, Chiang
	Mai University, Chiang Mai, Thailand
FAU	Kaewmong, Patcharaporn
AU	Kaewmong P
AD	Phuket Marine Biological Center, Phuket, Thailand
FAU	Kittiwattanawong, Kongkiat
AU	Kittiwattanawong K
AD	Phuket Marine Biological Center, Phuket, Thailand
FAU	Nganvongpanit, Korakot
AU	Nganvongpanit K
AUID	ORCID: 0000-0002-7617-5507
AD	Department of Veterinary Biosciences and Public Health, Faculty of Veterinary
	Medicine, Chiang Mai University, Chiang Mai, Thailand
LA	eng
PT	Journal Article
DEP	20210625
GR	R000022228
PHST	2021/03/08 [received]
PHST	2021/06/07 [accepted]
TA	PeerJ
JT	PeerJ
AID	11689 [pii]
AID	10.7717/peerj.11689 [doi]
SO	PeerJ. 2021 Jun 25;9:. doi:10.7717/peerj.11689.
PMC	PMC5086508
PMID	27829818
IS	1472-3646 (Print)
IS	1472-3654 (Electronic)
VI	2016
DP	2016
TI	Archaea in Natural and Impacted Brazilian Environments.
LID	1259608
AB	In recent years, archaeal diversity surveys have received increasing attention.
	Brazil is a country known for its natural diversity and variety of biomes, which
	makes it an interesting sampling site for such studies. However, archaeal
	communities in natural and impacted Brazilian environments have only recently
	been investigated. In this review, based on a search on the PubMed database on
	the last week of April 2016, we present and discuss the results obtained in the
	51 studies retrieved, focusing on archaeal communities in water, sediments, and
	soils of different Brazilian environments. We concluded that, in spite of its
	vast territory and biomes, the number of publications focusing on archaeal
	detection and/or characterization in Brazil is still incipient, indicating that
	these environments still represent a great potential to be explored.
FAU	Rodrigues, Thiago
AU	Rodrigues T
AUID	ORCID: 0000-0001-7782-9333
AD	Department of Cell Biology, Biological Sciences Institute, University of
	Brasília, 70910-900 Brasília, DF, Brazil
FAU	Belmok, Aline
AU	Belmok A
AUID	ORCID: 0000-0002-8524-3727
AD	Department of Cell Biology, Biological Sciences Institute, University of
	Brasília, 70910-900 Brasília, DF, Brazil
FAU	Catão, Elisa
AU	Catão E
AUID	ORCID: 0000-0003-4620-1097
AD	Department of Cell Biology, Biological Sciences Institute, University of
	Brasília, 70910-900 Brasília, DF, Brazil
FAU	Kyaw, Cynthia Maria
AU	Kyaw CM
AUID	ORCID: 0000-0002-0876-9717
AD	Department of Cell Biology, Biological Sciences Institute, University of
	Brasília, 70910-900 Brasília, DF, Brazil
LA	eng
PT	Journal Article
DEP	20161017
PHST	2016/06/02 [received]
PHST	2016/09/08 [accepted]
TA	Archaea
JT	Archaea
AID	10.1155/2016/1259608 [doi]
SO	Archaea. 2016 Oct 17;2016:. doi:10.1155/2016/1259608.
PMC	PMC10683811
PMID	37987585
IS	1080-6040 (Print)
IS	1080-6059 (Electronic)
VI	29
IP	12
DP	2023 Dec
TI	Molecular Detection and Characterization of Mycoplasma spp. in Marine Mammals,
	Brazil.
PG	2471-81
AB	Mycoplasma spp. are wall-less bacteria able to infect mammals and are classified
	as hemotropic (hemoplasma) and nonhemotropic. In aquatic mammals, hemoplasma have
	been reported in California sea lions (Zalophus californianus) and river dolphins
	(Inia spp.). We investigated Mycoplasma spp. in blood samples of West Indian
	manatees (Trichechus manatus), pinnipeds (5 species), and marine cetaceans (18
	species) that stranded or were undergoing rehabilitation in Brazil during
	2002–2022. We detected Mycoplasma in blood of 18/130 (14.8%) cetaceans and 3/18
	(16.6%) pinnipeds. All tested manatees were PCR-negative for Mycoplasma. Our
	findings indicate that >2 different hemoplasma species are circulating in
	cetaceans. The sequences from pinnipeds were similar to previously described
	sequences. We also detected a nonhemotropic Mycoplasma in 2 Franciscana dolphins
	(Pontoporia blainvillei) that might be associated with microscopic lesions.
	Because certain hemoplasmas can cause disease and death in immunosuppressed
	mammals, the bacteria could have conservation implications for already endangered
	aquatic mammals.
FAU	Duarte-Benvenuto, Aricia
AU	Duarte-Benvenuto A
FAU	Sacristán, Carlos
AU	Sacristán C
FAU	Ewbank, Ana Carolina
AU	Ewbank AC
FAU	Zamana-Ramblas, Roberta
AU	Zamana-Ramblas R
FAU	Lial, Henrique Christino
AU	Lial HC
FAU	Silva, Samira Costa
AU	Silva SC
FAU	Arias Lugo, Maria Alejandra
AU	Arias Lugo MA
FAU	Keid, Lara B.
AU	Keid LB
FAU	Pessi, Caroline F.
AU	Pessi CF
FAU	Sabbadini, José Rubens
AU	Sabbadini JR
FAU	Ribeiro, Vanessa L.
AU	Ribeiro VL
FAU	do Valle, Rodrigo del Rio
AU	do Valle Rdel R
FAU	Bertozzi, Carolina Pacheco
AU	Bertozzi CP
FAU	Colosio, Adriana Castaldo
AU	Colosio AC
FAU	Ramos, Hernani da Cunha Gomes
AU	Ramos Hda CG
FAU	Sánchez-Sarmiento, Angélica María
AU	Sánchez-Sarmiento AM
FAU	Ferioli, Raquel Beneton
AU	Ferioli RB
FAU	Pavanelli, Larissa
AU	Pavanelli L
FAU	Ikeda, Joana Midori Penalva
AU	Ikeda JMP
FAU	Carvalho, Vitor L.
AU	Carvalho VL
FAU	Catardo Gonçalves, Felipe Alexandre
AU	Catardo Gonçalves FA
FAU	Ibáñez-Porras, Pablo
AU	Ibáñez-Porras P
FAU	Sacristán, Irene
AU	Sacristán I
FAU	Catão-Dias, José Luiz
AU	Catão-Dias JL
LA	eng
PT	Journal Article
TA	Emerg Infect Dis
JT	Emerging Infectious Diseases
AID	23-0903 [pii]
AID	10.3201/eid2912.230903 [doi]
SO	Emerg Infect Dis. 2023 Dec;29(12):2471-81. doi:10.3201/eid2912.230903.
PMC	PMC10987208
PMID	38502961
IS	1367-4803 (Print)
IS	1367-4811 (Electronic)
VI	40
IP	4
DP	2024 Apr
TI	GINSA: an accumulator for paired locality and next-generation small ribosomal
	subunit sequence data.
LID	btae152
AB	Motivation: Motivated by the challenges of decentralized genetic data spread
	across multiple international organizations, GINSA leverages the Global
	Biodiversity Information Facility infrastructure to automatically retrieve and
	link small ribosomal subunit sequences with locality information. Results:
	Testing on taxa from major organism groups demonstrates broad applicability
	across taxonomic levels and dataset sizes. Availability and implementation: GINSA
	is a freely accessible Python program under the MIT License and can be installed
	from PyPI via pip.
FAU	Odle, Eric
AU	Odle E
AUID	ORCID: https://orcid.org/0000-0002-3141-042X
AD	Department of Natural History Sciences, Graduate School of Science, Hokkaido
	University, Sapporo, Hokkaido 060-0810, Japan
FAU	Kahng, Samuel
AU	Kahng S
AUID	ORCID: https://orcid.org/0000-0001-8299-8908
AD	Department of Oceanography, University of Hawaii at Manoa, Honolulu, HI 96822,
	United States
AD	Institute for the Advancement of Higher Education, Hokkaido University, Sapporo,
	Hokkaido 060-0817, Japan
FAU	Riewluang, Siratee
AU	Riewluang S
AD	Department of Natural History Sciences, Graduate School of Science, Hokkaido
	University, Sapporo, Hokkaido 060-0810, Japan
FAU	Kurihara, Kyoko
AU	Kurihara K
AD	Department of Natural History Sciences, Graduate School of Science, Hokkaido
	University, Sapporo, Hokkaido 060-0810, Japan
FAU	Wakeman, Kevin C
AU	Wakeman KC
AD	Institute for the Advancement of Higher Education, Hokkaido University, Sapporo,
	Hokkaido 060-0817, Japan
AD	Graduate School of Science, Hokkaido University, Sapporo, Hokkaido 060-0810,
	Japan
LA	eng
PT	Journal Article
DEP	20240319
GR	PH8D230001
PHST	2023/12/27 [received]
PHST	2024/02/15 [revised]
PHST	2024/03/16 [accepted]
TA	Bioinformatics
JT	Bioinformatics
AID	10.1093/bioinformatics/btae152 [doi]
AID	btae152 [pii]
SO	Bioinformatics. 2024 Mar 19;40(4):. doi:10.1093/bioinformatics/btae152.
PMC	PMC7200953
PMID	32399382
IS	2190-572X (Print)
IS	2190-5738 (Electronic)
VI	10
IP	5
DP	2020 May
TI	The draft genome of Staphylococcus warneri TRPF4, a bacteriocin producer with
	potent activity against the causative agent of Legionnaires' Disease.
LID	232
AB	In this work, we present the draft genome sequence of Staphylococcus warneri
	strain TRPF4 consisting of 2,634,550 bp with a G + C content of 32.4%. The genome
	sequence includes 2466 protein-coding genes, 11 rRNAs and 62 tRNAs, in 33
	contigs. Applying the Rapid Annotation using Subsystem Technology (RAST) a total
	of 1322 protein-coding genes were assigned to 393 subsystems. Also, a set of 1286
	protein-coding genes with designated functions were assigned to 21 categories in
	the Cluster of Orthologous Groups (COG) database. Further analysis of BAGEL3
	software demonstrated that the TRPF4 genome contains two gene clusters
	responsible for the synthesis of three bacteriocins, one warnericin RK and two
	delta-lysins. Besides, a novel delta-lysin of 3.48 kDa was identified for the
	first time. The three predicted bacteriocins were chemically synthesized and
	screened for the antimicrobial activity against a range of pathogens, exhibiting
	a potent and specific antimicrobial activity counter to L. pneumophila, with
	minimum inhibitory concentrations (MIC) ranging from 1.9 to 7.8 µg mL−1. These
	results indicate that the strain TRPF4 can produce bacteriocins with
	anti-Legionella activity. This was verified by the extracting the bacteriocins
	from the fermentation broth and testing against L. pneumophila. Additionally, the
	strain TRPF4 exhibited no cytotoxicity in mammalian cell lines. In summary, the
	genomic sequences and in vitro assays demonstrated the potential application of
	bacteriocins from S. warneri TRPF4 as a scaffold for further development of drugs
	against L. pneumophila, the causative agent of Legionnaires' Disease.Electronic
	supplementary material: The online version of this article
	(10.1007/s13205-020-02231-3) contains supplementary material, which is available
	to authorized users.
FAU	Freitas, Fernanda de Souza
AU	Freitas Fde S
AUID	ORCID: 0000-0002-2122-5829
AD	grid.12799.340000 0000 8338 6359Departamento de Microbiologia, Laboratório de
	Biotecnologia e Biodiversidade Para o Meio Ambiente, Universidade Federal de
	Viçosa, Peter Henry Rolfs Avenue w/n, Viçosa, MG Brazil
FAU	Vidigal, Pedro Marcus Pereira
AU	Vidigal PMP
AD	grid.12799.340000 0000 8338 6359Núcleo de Análise de Biomoléculas, Centro de
	Ciências Biológicas, Universidade Federal de Viçosa, Peter Henry Rolfs Avenue
	w/n, Viçosa, MG Brazil
FAU	Siqueira, Tatiane de Paula
AU	Siqueira Tde P
AD	grid.12799.340000 0000 8338 6359Departamento de Microbiologia, Laboratório de
	Biotecnologia e Biodiversidade Para o Meio Ambiente, Universidade Federal de
	Viçosa, Peter Henry Rolfs Avenue w/n, Viçosa, MG Brazil
FAU	de Barros, Mariana
AU	de Barros M
AD	grid.12799.340000 0000 8338 6359Departamento de Veterinária, Laboratório de
	Doenças Bacterianas, Universidade Federal de Viçosa, Peter Henry Rolfs Avenue
	w/n, Viçosa, MG Brazil
FAU	Tótola, Marcos Rogério
AU	Tótola MR
AD	grid.12799.340000 0000 8338 6359Departamento de Microbiologia, Laboratório de
	Biotecnologia e Biodiversidade Para o Meio Ambiente, Universidade Federal de
	Viçosa, Peter Henry Rolfs Avenue w/n, Viçosa, MG Brazil
LA	eng
PT	Journal Article
PT	Case Report
DEP	20200506
PHST	2020/02/18 [received]
PHST	2020/04/26 [accepted]
TA	3 Biotech
JT	3 Biotech
AID	2231 [pii]
AID	10.1007/s13205-020-02231-3 [doi]
SO	3 Biotech. 2020 May;10(5):. Epub 2020 May 6 doi:10.1007/s13205-020-02231-3.
PMC	PMC8608104
PMID	34807969
IS	1415-4757 (Print)
IS	1678-4685 (Electronic)
VI	44
IP	4
TI	A new view on the scenario of karyotypic stasis in Epinephelidae fish:
	Cytogenetic, historical, and biogeographic approaches.
LID	e20210122
AB	Epinephelidae (groupers) is an astonishingly diverse group of carnivorous fish
	widely distributed in reef environments around the world, with growing economic
	importance. The first chromosomal inferences suggested a conservative scenario
	for the family. However, to date, this has not been validated using biogeographic
	and phylogenetic approaches. Thus, to estimate karyotype diversification among
	groupers, eight species from the Atlantic and Indian oceans were investigated
	using conventional cytogenetic protocols and fluorescence in situ hybridization
	of repetitive sequences (rDNA, microsatellites, transposable elements). Despite
	the remarkable persistence of some symplesiomorphic karyotype patterns, such as
	all species sharing 2n=48 and most preserve a basal karyotype (2n=48
	acrocentrics), the chromosomal diversification in the family revealed an
	unsuspected evolutionary dynamic, where about 40% of the species escape from the
	ancestral karyotype pattern. These karyotype changes showed a relation with the
	historical biogeography, likely as a byproduct of the progressive occupancy of
	new areas (huge diversity of adaptive and speciation conditions). In this
	context, oceanic regions harboring more recent clades such as those of the
	Indo-Pacific, exhibited a higher karyotype diversity. Therefore, the karyotype
	evolution of Epinephelidae fits well with the expansion and geographic
	contingencies of its clades, providing a more complex and diverse scenario than
	previously assumed.
FAU	Amorim, Karlla Danielle Jorge
AU	Amorim KDJ
AD	Universidade Federal do Rio Grande do Norte, Departamento de Biologia Celular e
	Genética, Centro de Biociências, Natal, RN, Brazil.
FAU	da Costa, Gideão Wagner Werneck Félix
AU	da Costa GWWF
AD	Universidade Federal do Rio Grande do Norte, Departamento de Biologia Celular e
	Genética, Centro de Biociências, Natal, RN, Brazil.
FAU	Cioffi, Marcelo de Bello
AU	Cioffi Mde B
AUID	ORCID: 0000-0003-4340-1464
AD	Universidade Federal de São Carlos, Departamento de Genética e Evolução,
	Laboratório de Citogenética de Peixes, São Carlos, SP, Brazil.
FAU	Tanomtong, Alongklod
AU	Tanomtong A
AD	Khon Kaen University, Department of Biology, Faculty of Science, Muang, Khon
	Kaen, Thailand.
FAU	Bertollo, Luiz Antônio Carlos
AU	Bertollo LAC
AD	Universidade Federal de São Carlos, Departamento de Genética e Evolução,
	Laboratório de Citogenética de Peixes, São Carlos, SP, Brazil.
FAU	Molina, Wagner Franco
AU	Molina WF
AUID	ORCID: 0000-0002-6695-0952
AD	Universidade Federal do Rio Grande do Norte, Departamento de Biologia Celular e
	Genética, Centro de Biociências, Natal, RN, Brazil.
LA	eng
PT	Journal Article
PHST	2021/04/26 [received]
PHST	2021/09/15 [accepted]
TA	Genet Mol Biol
JT	Genetics and Molecular Biology
AID	10.1590/1678-4685-GMB-2021-0122 [doi]
SO	Genet Mol Biol. ;44(4):. doi:10.1590/1678-4685-GMB-2021-0122.
PMC	PMC7355893
PMID	32549367
IS	2076-2607 (Electronic)
VI	8
IP	6
DP	2020 Jun
TI	Molecular Characterization and Antimicrobial Susceptibilities of Nocardia Species
	Isolated from the Soil; A Comparison with Species Isolated from Humans.
LID	900
AB	Nocardia species, one of the most predominant Actinobacteria of the soil
	microbiota, cause infection in humans following traumatic inoculation or
	inhalation. The identification, typing, phylogenetic relationship and
	antimicrobial susceptibilities of 38 soil Nocardia strains from Lara State,
	Venezuela, were studied by 16S rRNA and gyrB (subunit B of topoisomerase II)
	genes, multilocus sequence analysis (MLSA), whole-genome sequencing (WGS), and
	microdilution. The results were compared with those for human strains. Just seven
	Nocardia species with one or two strains each, except for Nocardia
	cyriacigeorgica with 29, were identified. MLSA confirmed the species assignments
	made by 16S rRNA and gyrB analyses (89.5% and 71.0% respectively), and grouped
	each soil strain with its corresponding reference and clinical strains, except
	for 19 N. cyriacigeorgica strains found at five locations which grouped into a
	soil-only cluster. The soil strains of N. cyriacigeorgica showed fewer gyrB
	haplotypes than the examined human strains (13 vs. 17) but did show a larger
	number of gyrB SNPs (212 vs. 77). Their susceptibilities to antimicrobials were
	similar except for beta-lactams, fluoroquinolones, minocycline, and
	clarithromycin, with the soil strains more susceptible to the first three (p ≤
	0.05). WGS was performed on four strains belonging to the soil-only cluster and
	on two outside it, and the results compared with public N. cyriacigeorgica
	genomes. The average nucleotide/amino acid identity, in silico genome-to-genome
	hybridization similarity, and the difference in the genomic GC content, suggest
	that some strains of the soil-only cluster may belong to a novel subspecies or
	even a new species (proposed name Nocardia venezuelensis).
FAU	Carrasco, Gema
AU	Carrasco G
AD	Reference and Research Laboratory for Taxonomy, National Centre of Microbiology,
	Instituto de Salud Carlos III, Majadahonda, 28220 Madrid, Spain;
	gcarrasco@isciii.es (G.C.); sansegundojimenezmaria@gmail.com (M.S.S.);
	ivorycat3@hotmail.com (N.G.); mjmedina@isciii.es (M.J.M.-P.); pvillalon@isciii.es
	(P.V.)
FAU	Monzón, Sara
AU	Monzón S
AD	Bionformatics Unit, Applied Services, Training and Research, Instituto de Salud
	Carlos III, Majadahonda, 28220 Madrid, Spain; smonzon@isciii.es (S.M.);
	isabel.cuesta@isciii.es (I.C.)
FAU	San Segundo, María
AU	San Segundo M
AD	Reference and Research Laboratory for Taxonomy, National Centre of Microbiology,
	Instituto de Salud Carlos III, Majadahonda, 28220 Madrid, Spain;
	gcarrasco@isciii.es (G.C.); sansegundojimenezmaria@gmail.com (M.S.S.);
	ivorycat3@hotmail.com (N.G.); mjmedina@isciii.es (M.J.M.-P.); pvillalon@isciii.es
	(P.V.)
FAU	García, Enrique
AU	García E
AD	Soil Microbiology Laboratory, Microbiology and Parasitology Department, Pharmacy
	and Bioanalys Faculty, Los Andes University, Mérida 5101, Venezuela;
	egarcia@ula.ve (E.G.); ramirezana@ula.ve (A.R.)
FAU	Garrido, Noelia
AU	Garrido N
AD	Reference and Research Laboratory for Taxonomy, National Centre of Microbiology,
	Instituto de Salud Carlos III, Majadahonda, 28220 Madrid, Spain;
	gcarrasco@isciii.es (G.C.); sansegundojimenezmaria@gmail.com (M.S.S.);
	ivorycat3@hotmail.com (N.G.); mjmedina@isciii.es (M.J.M.-P.); pvillalon@isciii.es
	(P.V.)
FAU	Medina-Pascual, María J.
AU	Medina-Pascual MJ
AD	Reference and Research Laboratory for Taxonomy, National Centre of Microbiology,
	Instituto de Salud Carlos III, Majadahonda, 28220 Madrid, Spain;
	gcarrasco@isciii.es (G.C.); sansegundojimenezmaria@gmail.com (M.S.S.);
	ivorycat3@hotmail.com (N.G.); mjmedina@isciii.es (M.J.M.-P.); pvillalon@isciii.es
	(P.V.)
FAU	Villalón, Pilar
AU	Villalón P
AUID	ORCID: https://orcid.org/0000-0003-3026-2178
AD	Reference and Research Laboratory for Taxonomy, National Centre of Microbiology,
	Instituto de Salud Carlos III, Majadahonda, 28220 Madrid, Spain;
	gcarrasco@isciii.es (G.C.); sansegundojimenezmaria@gmail.com (M.S.S.);
	ivorycat3@hotmail.com (N.G.); mjmedina@isciii.es (M.J.M.-P.); pvillalon@isciii.es
	(P.V.)
FAU	Ramírez, Ana
AU	Ramírez A
AD	Soil Microbiology Laboratory, Microbiology and Parasitology Department, Pharmacy
	and Bioanalys Faculty, Los Andes University, Mérida 5101, Venezuela;
	egarcia@ula.ve (E.G.); ramirezana@ula.ve (A.R.)
FAU	Jiménez, Pilar
AU	Jiménez P
AD	Genomics Laboratory, Applied Services, Training and Research, Instituto de Salud
	Carlos III, Majadahonda, 28220 Madrid, Spain; mpsancho@isciii.es
FAU	Cuesta, Isabel
AU	Cuesta I
AD	Bionformatics Unit, Applied Services, Training and Research, Instituto de Salud
	Carlos III, Majadahonda, 28220 Madrid, Spain; smonzon@isciii.es (S.M.);
	isabel.cuesta@isciii.es (I.C.)
FAU	Valdezate, Sylvia
AU	Valdezate S
AUID	ORCID: https://orcid.org/0000-0002-3931-2162
AD	Reference and Research Laboratory for Taxonomy, National Centre of Microbiology,
	Instituto de Salud Carlos III, Majadahonda, 28220 Madrid, Spain;
	gcarrasco@isciii.es (G.C.); sansegundojimenezmaria@gmail.com (M.S.S.);
	ivorycat3@hotmail.com (N.G.); mjmedina@isciii.es (M.J.M.-P.); pvillalon@isciii.es
	(P.V.)
LA	eng
PT	Journal Article
DEP	20200615
PHST	2020/05/22 [received]
PHST	2020/06/11 [accepted]
TA	Microorganisms
JT	Microorganisms
AID	10.3390/microorganisms8060900 [doi]
AID	microorganisms-08-00900 [pii]
SO	Microorganisms. 2020 Jun 15;8(6):. doi:10.3390/microorganisms8060900.

## Sheet: Dimensions
Rank	Publication ID	DOI	PMID	PMCID	Title	Abstract	Acknowledgements	Funding	Source title	Anthology title	Book editors	MeSH terms	Publication date	PubYear	Publication date (online)	Publication date (print)	Volume	Issue	Pagination	Open Access	Publication Type	Authors	Authors (Raw Affiliation)	Corresponding Authors	Authors Affiliations	Times cited	Recent citations	RCR	FCR	Source Linkout	Dimensions URL	Fields of Research (ANZSRC 2020)	Sustainable Development Goals
10795	pub.1147471047	10.1007/s00248-022-02018-4	35484416		DNA Metabarcoding Reveals Cryptic Diversity in Forest Soils on the Isolated Brazilian Trindade Island South Atlantic	Abstract_x000D_ Located 1140 km from the South American coastline in the South Atlantic Ocean and with an age of 4 million years Trindade Island is the most recent volcanic component of Brazilian territory. Its original native vegetation has been severely damaged by human influence in particular through the introduction of exotic grazing animals such as goats. However since the complete eradicati…	We thank congresswoman Jô Moraes and the Biological Sciences Institute at the University of Brasilia. We thank the Brazilian Navy and POIT staff.	This study received financial support from CNPq CAPES and FAPEMIG. Peter Convey is supported by NERC core funding to the BAS “Biodiversity Evolution and Adaptation” Team.	Microbial Ecology			Animals; Humans; Child Preschool; DNA Barcoding Taxonomic; Soil; Brazil; Eukaryota; Forests; Biodiversity; Bacteria; Archaea; Fungi; Plants	2022-04-28	2022	2022-04-28	2023-04	85	3	1056-1071	Closed	Article	Câmara Paulo E. A. S.; Bones Fábio Leal Viana; Lopes Fabyano Alvares Cardoso; Oliveira Fabio S.; Barreto Cristine Chaves; Knop Henriques Diego; Campos Larissa Paraguassu; Carvalho-Silva Micheline; Convey Peter; Rosa Luiz Henrique	Câmara Paulo E. A. S. (Departamento de Botânica Universidade de Brasília Brasília Brasil; Pós Graduação Em Plantas Fungos E Algas Universidade Federal de Santa Catarina Florianópolis Brasil); Bones Fábio Leal Viana (Pós Graduação Em Plantas Fungos E Algas Universidade Federal de Santa Catarina Florianópolis Brasil); Lopes Fabyano Alvares Cardoso (Laboratório de Microbiologia Universidade Federal …	Câmara Paulo E. A. S. (University of Brasília; Universidade Federal de Santa Catarina)	Câmara Paulo E. A. S. (University of Brasília; Universidade Federal de Santa Catarina); Bones Fábio Leal Viana (Universidade Federal de Santa Catarina); Lopes Fabyano Alvares Cardoso (Federal University of Tocantins); Oliveira Fabio S. (Universidade Federal de Minas Gerais); Barreto Cristine Chaves (Universidade Católica de Brasília); Knop Henriques Diego (University of Brasília); Campos Larissa …	5	5		3.58		https://app.dimensions.ai/details/publication/pub.1147471047	31 Biological Sciences; 3103 Ecology	15 Life on Land
9189	pub.1151864939	10.1111/1462-2920.16245	36229418		Core rhizosphere microbiome of Panax notoginseng and its associations with belowground biomass and saponin contents	The core rhizosphere microbiome is critical for plant fitness. However its contribution to the belowground biomass and saponin contents of Panax notoginseng remains unclear. High-throughput sequencing of amplicon and metagenome was performed to obtain the microbiome profiles and functional traits in P. notoginseng rhizosphere across a large spatial scale. We obtained 639 bacterial and 310 fungal …	ACKNOWLEDGEMENTS This study was supported by grants from the Major Science and Technology Projects of Yunnan Province (No. 202102AA100052 and 202102AA310048‐1) Fundamental Research Funds for the Central public welfare research institutes (Nos. ZXKT21037 ZZ15‐YQ‐044 and ZXKT22001) and Scientific Research Project of Hainan Academician Innovation Platform (SQ2021PTZ0052). CONFLICT OF INTEREST All au…	Funding information Fundamental Research Funds for the Central Public Welfare Research Institutes Grant/Award Numbers: ZXKT21037 ZZ15YQ044 ZXKT22001; Major Science and Technology Projects of Yunnan Province Grant/Award Numbers: 202102AA100052 202102AA3100481; Scientific Research Project of Hainan Academician Innovation Platform Grant/Award Number: SQ2021PTZ0052	Environmental Microbiology			Rhizosphere; Panax notoginseng; Soil Microbiology; Biomass; Saponins; Plant Roots; Microbiota	2022-10-21	2022	2022-10-21	2022-12	24	12	6238-6251	Closed	Article	Wei Guangfei; Zhang Guozhuang; Li Mengzhi; Liu Congsheng; Wei Fugang; Wang Yong; Huang Zhixin; Chen Zhongjian; Zheng Yuqing; Chen Shilin; Dong Linlin	Wei Guangfei (Key Laboratory of Beijing for Identification and Safety Evaluation of Chinese Medicine Institute of Chinese Materia Medica China Academy of Chinese Medical Sciences Beijing China); Zhang Guozhuang (Key Laboratory of Beijing for Identification and Safety Evaluation of Chinese Medicine Institute of Chinese Materia Medica China Academy of Chinese Medical Sciences Beijing China); Li Men…	Dong Linlin (China Academy of Chinese Medical Sciences)	Wei Guangfei (China Academy of Chinese Medical Sciences); Zhang Guozhuang (China Academy of Chinese Medical Sciences); Li Mengzhi (China Academy of Chinese Medical Sciences); Liu Congsheng (Zhangzhou Pien Tze Huang Pharmaceutical Co. Ltd Fujian China); Wei Fugang (Wenshan Miaoxiang Notoginseng Technology Co. Ltd Wenshan China); Wang Yong (Wenshan University); Huang Zhixin (Zhangzhou Pien Tze Huan…	10	10	0.83	4.83		https://app.dimensions.ai/details/publication/pub.1151864939	31 Biological Sciences; 3103 Ecology; 3107 Microbiology
6984	pub.1046405421	10.1016/j.mimet.2014.08.018	25193439		Data analysis for 16S microbial profiling from different benchtop sequencing platforms	Progress in microbial ecology is confounded by problems when evaluating results from different sequencing methodologies. Contrary to existing expectations here we demonstrate that the same biological conclusion is reached using different NGS technologies when stringent sequence quality filtering and accurate clustering algorithms are applied.	We would like to thank the Brazilian Navy and Captain Rodrigo Otoch Chaves for the logistic support while collecting samples. We are also grateful to Sarah Owens (Argonne National Laboratory/USA) for helping with Illumina 16S sequencing and Alysson Silvano Alexia Leite Raphael Fonseca and Beatriz Pinto from Life Technologies/Brazil for providing all structures for 16S sequencing on PGM Ion torren…		Journal of Microbiological Methods			Archaea; Bacteria; Brazil; Computational Biology; High-Throughput Nucleotide Sequencing; Metagenome; Phylogeny; RNA Ribosomal 16S; Soil Microbiology	2014-09-03	2014	2014-09-03	2014-12	107		30-37	All OA; Hybrid	Article	Pylro Victor S.; Roesch Luiz Fernando W.; Morais Daniel K.; Clark Ian M.; Hirsch Penny R.; Tótola Marcos R.	Pylro Victor S. (Microbiology Department Universidade Federal de Viçosa Viçosa MG 36570-900 Brazil; AgroEcology Department Rothamsted Research Harpenden Herts AL52JQ United Kingdom); Roesch Luiz Fernando W. (Universidade Federal do Pampa São Gabriel RS 97300-000 Brazil); Morais Daniel K. (Microbiology Department Universidade Federal de Viçosa Viçosa MG 36570-900 Brazil; AgroEcology Department Rot…	Pylro Victor S. (Universidade Federal de Viçosa; Rothamsted Research); Roesch Luiz Fernando W. (Universidade Federal do Pampa)	Pylro Victor S. (Universidade Federal de Viçosa; Rothamsted Research); Roesch Luiz Fernando W. (Universidade Federal do Pampa); Morais Daniel K. (Universidade Federal de Viçosa; Rothamsted Research); Clark Ian M. (Rothamsted Research); Hirsch Penny R. (Rothamsted Research); Tótola Marcos R. (Universidade Federal de Viçosa)	200	10	5.74	16.51	https://doi.org/10.1016/j.mimet.2014.08.018	https://app.dimensions.ai/details/publication/pub.1046405421	31 Biological Sciences; 3102 Bioinformatics and Computational Biology
6662	pub.1162957730	10.7717/peerj.15762	37547721	PMC10402703	Protist taxonomic and functional diversity in aquatic ecosystems of the Brazilian Atlantic Forest	The Brazilian Atlantic Forest and its associated ecosystems are highly biodiverse but still understudied especially with respect to eukaryotic microbes. Protists represent the largest proportion of eukaryotic diversity and play important roles in nutrient cycling and maintenance of the ecosystems in which they occur. However much of protist diversity remains unknown particularly in the Neotropics…	We thank the team of the Laboratory of Protozoology of the Universidade Federal do Rio de Janeiro for the technical support.	This work was supported by the Fundação Carlos Chagas Filho de Amparo à Pesquisa do Estado do Rio de Janeiro (FAPERJ No. E-202.325/2018). The funders had no role in study design data collection and analysis decision to publish or preparation of the manuscript.	PeerJ			Ecosystem; Brazil; Biodiversity; Forests; Ciliophora	2023-08-01	2023	2023-08-01		11		e15762	All OA; Gold	Article	da Silva Vanessa Carvalho; Fernandes Noemi	da Silva Vanessa Carvalho (Instituto de Recursos Naturais Programa de Pós-Graduação em Meio Ambiente e Recursos Hídricos Universidade Federal de Itajubá Itajubá Minas Gerais Brazil); Fernandes Noemi (Instituto de Recursos Naturais Programa de Pós-Graduação em Meio Ambiente e Recursos Hídricos Universidade Federal de Itajubá Itajubá Minas Gerais Brazil)	Fernandes Noemi (Federal University of Itajubá)	da Silva Vanessa Carvalho (Federal University of Itajubá); Fernandes Noemi (Federal University of Itajubá)	2	2			https://doi.org/10.7717/peerj.15762	https://app.dimensions.ai/details/publication/pub.1162957730	31 Biological Sciences; 3103 Ecology; 3107 Microbiology
5750	pub.1040830593	10.1371/journal.pone.0130084	26090804	PMC4474894	Baseline Assessment of Mesophotic Reefs of the Vitória-Trindade Seamount Chain Based on Water Quality Microbial Diversity Benthic Cover and Fish Biomass Data	Seamounts are considered important sources of biodiversity and minerals. However their biodiversity and health status are not well understood; therefore potential conservation problems are unknown. The mesophotic reefs of the Vitória-Trindade Seamount Chain (VTC) were investigated via benthic community and fish surveys metagenomic and water chemistry analyses and water microbial abundance estimat…	The authors acknowledge support from the International Research Center for Infectious Diseases Research Institute for Microbial Diseases Osaka University Japan (Ministry of Education Science Sports Culture and Technology) as well as the National Council for Scientific and Technological Development (CNPq) Universal and Oceanic Islands (04678-2011). The authors also thank Ricardo Bahia and Arthur G…	The authors acknowledge support from the International Research Center for Infectious Diseases Research Institute for Microbial Diseases Osaka University Japan (Ministry of Education Science Sports Culture and Technology) as well as the National Council for Scientific and Technological Development (CNPq) Universal and Oceanic Islands (04678-2011). The authors also thank Ricardo Bahia and Arthur G…	PLOS ONE		Chaolun Allen Chen	Animals; Atlantic Ocean; Biodiversity; Biomass; Brazil; Coral Reefs; Ecosystem; Fishes; Metagenomics; Water Microbiology; Water Quality	2015-06-19	2015	2015-06-19		10	6	e0130084	All OA; Gold	Article	Meirelles Pedro M.; Amado-Filho Gilberto M.; Pereira-Filho Guilherme H.; Pinheiro Hudson T.; de Moura Rodrigo L.; Joyeux Jean-Christophe; Mazzei Eric F.; Bastos Alex C.; Edwards Robert A.; Dinsdale Elizabeth; Paranhos Rodolfo; Santos Eidy O.; Iida Tetsuya; Gotoh Kazuyoshi; Nakamura Shota; Sawabe Tomoo; Rezende Carlos E.; Gadelha Luiz M. R.; Francini-Filho Ronaldo B.; Thompson Cristiane; Thompson …	Meirelles Pedro M. (Institute of Biology and SAGE-COPPE Federal University of Rio de Janeiro (UFRJ) Rio de Janeiro Brazil); Amado-Filho Gilberto M. (Rio de Janeiro Botanical Garden Research Institute (IP-JBRJ) Rio de Janeiro Brazil); Pereira-Filho Guilherme H. (Institute of Marine Sciences Federal University of São Paulo (UNIFESP) Santos Brazil); Pinheiro Hudson T. (Department of Ichthyology Cali…	Thompson Fabiano L. (Federal University of Rio de Janeiro)	Meirelles Pedro M. (Federal University of Rio de Janeiro); Amado-Filho Gilberto M. (Instituto de Pesquisas Jardim Botânico do Rio de Janeiro); Pereira-Filho Guilherme H. (Federal University of São Paulo); Pinheiro Hudson T. (California Academy of Sciences; University of California Santa Cruz; Universidade Federal do Espírito Santo; Associação Ambiental Voz da Natureza Av Cel. Schwab Filho 104/501…	58	8	0.6	6.85	https://journals.plos.org/plosone/article/file?id=10.1371/journal.pone.0130084&type=printable	https://app.dimensions.ai/details/publication/pub.1040830593	31 Biological Sciences; 3103 Ecology; 41 Environmental Sciences; 4104 Environmental Management	14 Life Below Water
5742	pub.1146249663	10.1128/mra.01175-21	35286159	PMC9022567	Whole-Genome Shotgun (WGS) Sequence of cis-Isoprene Polymer-Degrading Nocardia sp. strain BSTN01	Species belonging to the genus Nocardia are known to be facultative human pathogens. There are also reports of Nocardia species capable of degrading various forms of rubber. Here we report the whole-genome shotgun (WGS) sequence of Nocardia sp. strain BSTN01 isolated from stored water in latex-collecting cups thrown away near a local rubber processing unit in Tripura India.	B.S. gratefully acknowledges financial assistance in the form of fellowship from the University of Calcutta.		Microbiology Resource Announcements		Frank J. Stewart		2022-03-14	2022	2022-03-14	2022-04-21	11	4	e01175-21	All OA; Gold	Article	Sarkar Biraj; Mandal Amit Kumar; Ghati Amit; Ghosh Pranab; Mandal Sukhendu; Kati Ahmet	Sarkar Biraj (Laboratory of Molecular Bacteriology Department of Microbiology University of Calcutta Kolkata India); Mandal Amit Kumar (Chemical Biology Laboratory Department of Sericulture Raiganj University North Dinajpur West Bengal India); Ghati Amit (Department of Microbiology Barrackpore Rastraguru Surendranath College Kolkata India); Ghosh Pranab (Department of Chemistry University of Nort…	Mandal Sukhendu (University of Calcutta); Kati Ahmet (Sağlık Bilimleri Üniversitesi; Department of Biotechnology Institution of Health Sciences University of Health Sciences Turkey Uskudar Istanbul Turkey)	Sarkar Biraj (University of Calcutta); Mandal Amit Kumar (Raiganj University); Ghati Amit (West Bengal State University); Ghosh Pranab (North Bengal University); Mandal Sukhendu (University of Calcutta); Kati Ahmet (Sağlık Bilimleri Üniversitesi; Department of Biotechnology Institution of Health Sciences University of Health Sciences Turkey Uskudar Istanbul Turkey)	1	0		0.39	https://doi.org/10.1128/mra.01175-21	https://app.dimensions.ai/details/publication/pub.1146249663	31 Biological Sciences; 3105 Genetics; 3107 Microbiology
5625	pub.1091623591	10.1093/gigascience/gix089	29050374	PMC7059795	Taxonomic structure and functional association of foxtail millet root microbiome	The root microbes play pivotal roles in plant productivity nutrient uptakes and disease resistance. The root microbial community structure has been extensively investigated by 16S/18S/ITS amplicons and metagenomic sequencing in crops and model plants. However the functional associations between root microbes and host plant growth are poorly understood. This work investigates the root bacterial co…	The authors acknowledge the assistance of Bo Wang and other colleagues in the genome sequencing platform of BGI-Shenzhen.	This work was funded by BGI-Shenzhen The National Natural Science Foundation of China (U1301252) a Strategic Priority Research Program of the Chinese Academy of Sciences Grant (XDB11020700) and a Priority Research Program of the Chinese Academy of Science Grant (QYZDB-SSW-SMC021).We also want to thank Shenzhen Key Laboratory of Environmental Microbial Genomics and Application BGI-Shenzhen Shenzhe…	GigaScience			Bacteria; DNA Barcoding Taxonomic; Genome Bacterial; Microbiota; Millets; RNA Ribosomal 16S; Rhizome	2017-09-05	2017	2017-09-05	2017-10-01	6	10	2024-12-01	All OA; Gold	Article	Jin Tao; Wang Yayu; Huang Yueying; Xu Jin; Zhang Pengfan; Wang Nian; Liu Xin; Chu Haiyan; Liu Guang; Jiang Honggang; Li Yuzhen; Xu Jing; Kristiansen Karsten; Xiao Liang; Zhang Yunzeng; Zhang Gengyun; Du Guohua; Zhang Houbao; Zou Hongfeng; Zhang Haifeng; Jie Zhuye; Liang Suisha; Jia Huijue; Wan Jingwang; Lin Dechun; Li Jinying; Fan Guangyi; Yang Huanming; Wang Jian; Bai Yang; Xu Xun	Jin Tao (BGI-Qingdao Qingdao 266510 China; China National Genebank-Shenzhen BGI-Shenzhen Shenzhen 518083 China); Wang Yayu (BGI-Qingdao Qingdao 266510 China); Huang Yueying (BGI-Qingdao Qingdao 266510 China); Xu Jin (BGI-Qingdao Qingdao 266510 China; Citrus Research and Education Center Department of Microbiology and Cell Science IFAS University of Florida Lake Alfred FL USA); Zhang Pengfan (BGI-…	Jin Tao (BGI Group (China); BGI Group (China)); Wang Yayu (BGI Group (China)); Huang Yueying (BGI Group (China)); Xu Jin (BGI Group (China); University of Florida); Bai Yang (State Key Laboratory of Plant Genomics Institute of Genetics and Developmental Biology Chinese Academy of Science Beijing 100101 China; Institute of Genetics and Developmental Biology; University of Chinese Academy of Scienc…	Jin Tao (BGI Group (China); BGI Group (China)); Wang Yayu (BGI Group (China)); Huang Yueying (BGI Group (China)); Xu Jin (BGI Group (China); University of Florida); Zhang Pengfan (BGI Group (China); University of Chinese Academy of Sciences); Wang Nian (University of Florida); Liu Xin (BGI Group (China); BGI Group (China)); Chu Haiyan (Institute of Soil Science); Liu Guang (BGI Group (China)); Ji…	184	32	5.81	22.97	https://academic.oup.com/gigascience/article-pdf/6/10/gix089/25512756/gix089.pdf	https://app.dimensions.ai/details/publication/pub.1091623591	31 Biological Sciences; 3103 Ecology; 3107 Microbiology	2 Zero Hunger
5510	pub.1026029370	10.1016/j.jenvman.2015.03.016	25791233		Prospect isolation and characterization of microorganisms for potential use in cases of oil bioremediation along the coast of Trindade Island Brazil	In the present study acrylic coupons with a thin layer of oil on the surface were incubated in the coastal water of Trindade Island Brazil for 60 days. The microorganisms adhered to the coupons were isolated using enrichment medium with hexadecane and naphthalene as the sole carbon and energy source. A total of 15 bacterial isolates were obtained and the ability of these isolates to use different…	This work was supported by National Council for Scientific and Technological Development (Conselho Nacional de Desenvolvimento Científico e Tecnológico – CNPq) which provided all approvals and permits (project grant number 405544/2012-0 and authorization access to genetic resources process number 010645/2013-6) and Brazilian Navy. We would also like to thank Dr. Péricles Leonardo Fernandes and Ms…		Journal of Environmental Management			Actinobacteria; Biodegradation Environmental; Brazil; DNA Primers; Hydrocarbons; Molecular Sequence Data; Naphthalenes; Polycyclic Aromatic Hydrocarbons; Polymerase Chain Reaction; Pyrenes; RNA Ribosomal 16S; Rhodococcus; Tropical Climate; Water Microbiology; Water Pollutants Chemical	2015-03-16	2015	2015-03-16	2015-06	156		15-22	All OA; Green	Article	Rodrigues Edmo M.; Kalks Karlos H.M.; Tótola Marcos R.	Rodrigues Edmo M. (Laboratório de Biotecnologia e Biodiversidade para o Meio Ambiente Departamento de Microbiologia Universidade Federal de Viçosa Viçosa Minas Gerais Brazil); Kalks Karlos H.M. (Laboratório de Biotecnologia e Biodiversidade para o Meio Ambiente Departamento de Microbiologia Universidade Federal de Viçosa Viçosa Minas Gerais Brazil); Tótola Marcos R. (Laboratório de Biotecnologia …	Rodrigues Edmo M. (Universidade Federal de Viçosa); Tótola Marcos R. (Universidade Federal de Viçosa)	Rodrigues Edmo M. (Universidade Federal de Viçosa); Kalks Karlos H.M. (Universidade Federal de Viçosa); Tótola Marcos R. (Universidade Federal de Viçosa)	39	5	1.31	3.4	http://www.locus.ufv.br/handle/123456789/19399	https://app.dimensions.ai/details/publication/pub.1026029370	31 Biological Sciences; 3107 Microbiology	14 Life Below Water
5429	pub.1033513041	10.7717/peerj.1733	26925341	PMC4768689	Responses of microbial community from tropical pristine coastal soil to crude oil contamination	Brazilian offshore crude oil exploration has increased after the discovery of new reservoirs in the region known as pré-sal in a depth of 7.000 m under the water surface. Oceanic islands near these areas represent sensitive environments where changes in microbial communities due oil contamination could stand for the loss of metabolic functions with catastrophic effects to the soil services provid…	Conselho Nacional de Desenvolvimento Científico e Tecnológico (CNPq) grant 405544/2012-0 and Coordenação de Aperfeiçoamento de Pessoal de Nível Superior (CAPES/PROEX) financed this work. Rothamsted Research receives strategic funding from the Biological Sciences Research Council (BBSRC) of the UK. The funders had no role in study design data collection and analysis decision to publish or preparat…		PeerJ		Yu Liu		2016-02-18	2016	2016-02-18		4		e1733	All OA; Gold	Article	Morais Daniel; Pylro Victor; Clark Ian M.; Hirsch Penny R.; Tótola Marcos R.	Morais Daniel (Department of Microbiology Universidade Federal de Viçosa Viçosa Minas Gerais Brazil; AgroEcology Department Rothamsted Research Harpenden Hertfordshire United Kingdom); Pylro Victor (Genomics and Computational Biology Group René Rachou Research Center (CPqRR-FIOCRUZ) Belo Horizonte Minas Gerais Brazil); Clark Ian M. (AgroEcology Department Rothamsted Research Harpenden Hertfordshi…	Morais Daniel (Universidade Federal de Viçosa; Rothamsted Research)	Morais Daniel (Universidade Federal de Viçosa; Rothamsted Research); Pylro Victor (Genomics and Computational Biology Group René Rachou Research Center (CPqRR-FIOCRUZ) Belo Horizonte Minas Gerais Brazil); Clark Ian M. (Rothamsted Research); Hirsch Penny R. (Rothamsted Research); Tótola Marcos R. (Universidade Federal de Viçosa)	30	5	1.1	3.02	https://peerj.com/articles/1733.pdf	https://app.dimensions.ai/details/publication/pub.1033513041	31 Biological Sciences; 3107 Microbiology; 41 Environmental Sciences; 4105 Pollution and Contamination	14 Life Below Water
5380	pub.1092063447	10.1007/s00248-017-1078-8	28971238		Aliphatic Hydrocarbon Enhances Phenanthrene Degradation by Autochthonous Prokaryotic Communities from a Pristine Seawater	The microbial diversity and functioning around oceanic islands is poorly described despite its importance for ecosystem homeostasis. Here we aimed to verify the occurrence of microbe-driven phenanthrene co-oxidation in the seawater surrounding the Trindade Island (Brazil). We also used Next-Generation Sequencing to evaluate the effects of aliphatic and polycyclic aromatic hydrocarbons (PAHs) on t…	We would like to thank the Brazilian Navy Captain Rodrigo Otoch Chaves and Captain Sidnei da Costa Abrantes for the logistic support while collecting samples. This work was supported by the National Council for Scientific and Technological Development (Conselho Nacional de Desenvolvimento Científico e Tecnológico/CNPq) which provided all approvals and permits (project grant number 405544/2012-0 a…		Microbial Ecology			Alkanes; Alphaproteobacteria; Bacteria; Biodegradation Environmental; Biodiversity; Brazil; DNA Bacterial; Ecosystem; Gammaproteobacteria; High-Throughput Nucleotide Sequencing; Hydrocarbons; Islands; Metagenomics; Microbial Consortia; Petroleum Pollution; Phenanthrenes; Polycyclic Aromatic Hydrocarbons; Pyrenes; RNA Ribosomal 16S; Seawater; Water Pollutants	2017-10-03	2017	2017-10-03	2018-04	75	3	688-700	All OA; Green	Article	Rodrigues Edmo Montes; Morais Daniel Kumazawa; Pylro Victor Satler; Redmile-Gordon Marc; de Oliveira Juraci Alves; Roesch Luiz Fernando Wurdig; Cesar Dionéia Evangelista; Tótola Marcos Rogério	Rodrigues Edmo Montes (Laboratório de Biotecnologia e Biodiversidade para o Meio Ambiente Departamento de Microbiologia Universidade Federal de Viçosa Viçosa Minas Gerais Brazil); Morais Daniel Kumazawa (Laboratory of Environmental Microbiology Institute of Microbiology of the Czech Institute of Sciences (CAS) Prague Czech Republic); Pylro Victor Satler (Soil Microbiology Laboratory Department of…	Rodrigues Edmo Montes (Universidade Federal de Viçosa)	Rodrigues Edmo Montes (Universidade Federal de Viçosa); Morais Daniel Kumazawa (Czech Academy of Sciences); Pylro Victor Satler (Soil Microbiology Laboratory Department of Soil Science “Luiz de Queiroz” College of Agriculture ESALQ/USP Piracicaba São Paulo Brazil); Redmile-Gordon Marc (Rothamsted Research); de Oliveira Juraci Alves (Universidade Federal de Viçosa); Roesch Luiz Fernando Wurdig (Un…	12	3	0.61	1.21	http://www.locus.ufv.br/handle/123456789/19397	https://app.dimensions.ai/details/publication/pub.1092063447	31 Biological Sciences; 3107 Microbiology; 41 Environmental Sciences; 4105 Pollution and Contamination
5287	pub.1104989968	10.1016/j.marpolbul.2018.06.015	30041354		Potential microbial consortium involved in the biodegradation of diesel hexadecane and phenanthrene in mangrove sediment explored by metagenomics analysis	Hydrocarbon contamination is a serious problem that degrades the quality of mangrove ecosystems and bioremediation using autochthonous bacteria is a promising technology to recover an impacted environment. This research investigates the biodegradation rates of diesel hexadecane and phenanthrene by conducting a microcosm study and survey of the autochthonous microbial community in contaminated man…	This research was supported by the National Research Council of Thailand through the Biodiversity-Based Economy Development Office (Public Organization (BEDO)) and the Faculty of Science Mahidol University. The authors would also like to thank the Chulalongkorn University Graduate School for its financial support through the CU Graduate School Thesis Grant.		Marine Pollution Bulletin			Alkanes; Bacteria; Biodegradation Environmental; Environmental Pollutants; Gasoline; Geologic Sediments; Metagenomics; Microbial Consortia; Phenanthrenes; RNA Ribosomal 16S; Thailand; Wetlands	2018-06-19	2018	2018-06-19	2018-08	133		595-605	Closed	Article	Tiralerdpanich Parichaya; Sonthiphand Prinpida; Luepromchai Ekawan; Pinyakong Onruthai; Pokethitiyook Prayad	Tiralerdpanich Parichaya (International Postgraduate Program in Hazardous Substance and Environmental Management Chulalongkorn University 9th Floor CU Research Building Phayathai Road Bangkok 10330 Thailand; Center of Excellence on Hazardous Substance Management Chulalongkorn University 8th Floor CU Research Building Phayathai Road Bangkok 10330 Thailand); Sonthiphand Prinpida (Department of Biol…	Sonthiphand Prinpida (Mahidol University)	Tiralerdpanich Parichaya (Chulalongkorn University; Chulalongkorn University); Sonthiphand Prinpida (Mahidol University); Luepromchai Ekawan (Chulalongkorn University; Chulalongkorn University); Pinyakong Onruthai (Chulalongkorn University; Chulalongkorn University); Pokethitiyook Prayad (Mahidol University)	45	16	1.9	5.76		https://app.dimensions.ai/details/publication/pub.1104989968	31 Biological Sciences; 3107 Microbiology; 41 Environmental Sciences; 4103 Environmental Biotechnology; 4105 Pollution and Contamination
5240	pub.1009656204	10.1007/s00792-015-0740-7	25701018		Unexplored Brazilian oceanic island host high salt tolerant biosurfactant-producing bacterial strains	We aimed to isolate biosurfactant-producing bacteria in high salt conditions from uncontaminated soils on the Brazilian oceanic island Trindade. Blood agar medium was used for the isolation of presumptive biosurfactant-producing bacteria. Confirmation and measurements of biosurfactant production were made using an oil-spreading method. The isolates were identified by fatty acid profiles and parti…	We would like to thank the Brazilian Navy and Captain Rodrigo Otoch Chaves for the logistic support while collecting samples and providing the essential structure to sample transportation and storage and Dr. Marc Redmile-Gordon (Centre for Sustainable Soils and Grassland Systems Rothamsted Research UK) for critical comments and review of the written English in the manuscript. CNPq grant 405544/20…		Extremophiles			Bacillus; Islands; Salt Tolerance; Sodium Chloride; Soil; Soil Microbiology; Surface-Active Agents	2015-02-21	2015	2015-02-21	2015-05	19	3	561-572	All OA; Green	Article	da Silva Fábio Sérgio Paulino; Pylro Victor Satler; Fernandes Pericles Leonardo; Barcelos Gisele Souza; Kalks Karlos Henrique Martins; Schaefer Carlos Ernesto Gonçalves Reynaud; Tótola Marcos Rogério	da Silva Fábio Sérgio Paulino (Departamento de Microbiologia Universidade Federal de Viçosa Av. P.H. Rolfs S/N Campus CEP 36570-000 Viçosa MG Brazil); Pylro Victor Satler (Departamento de Microbiologia Universidade Federal de Viçosa Av. P.H. Rolfs S/N Campus CEP 36570-000 Viçosa MG Brazil); Fernandes Pericles Leonardo (Departamento de Microbiologia Universidade Federal de Viçosa Av. P.H. Rolfs S/…	Pylro Victor Satler (Universidade Federal de Viçosa)	da Silva Fábio Sérgio Paulino (Universidade Federal de Viçosa); Pylro Victor Satler (Universidade Federal de Viçosa); Fernandes Pericles Leonardo (Universidade Federal de Viçosa); Barcelos Gisele Souza (Universidade Federal de Viçosa); Kalks Karlos Henrique Martins (Universidade Federal de Viçosa); Schaefer Carlos Ernesto Gonçalves Reynaud (Universidade Federal de Viçosa); Tótola Marcos Rogério (…	18	0	0.79	1.57	http://www.locus.ufv.br/handle/123456789/19762	https://app.dimensions.ai/details/publication/pub.1009656204	31 Biological Sciences; 3107 Microbiology
5050	pub.1172768785	10.1016/j.scitotenv.2024.173772	38871313		Combined influence of the nanoplastics and polycyclic aromatic hydrocarbons exposure on microbial community in seawater environment	Nanoplastics (NPs) and polycyclic aromatic hydrocarbons (PAHs) are recognized as persistent organic pollutant (POPs) with demonstrated physiological toxicity. When present in aquatic environments the two pollutants could combine with each other resulting in cumulative toxicity to organisms. However the combined impact of NPs and PAHs on microorganisms in seawater is not well understood. In this s…	Declaration of competing interest The authors declare that they have no known competing financial interests or personal relationships that could have appeared to influence the work reported in this paper. Acknowledgements This research was financially supported by the National Natural Science Foundation of China (42006174 and 41876134) the National Key Research and Development Program of China (2…		The Science of The Total Environment			Polycyclic Aromatic Hydrocarbons; Seawater; Water Pollutants Chemical; Microbiota; Bacteria; Water Microbiology; Microplastics; Biodiversity; Environmental Monitoring	2024-06-12	2024	2024-06-12	2024-10	945		173772	Closed	Article	Guan Xin; Jia Dai; Liu Xinyu; Ding Changling; Guo Jinfei; Yao Min; Zhang Zhan; Zhou Mengxi; Sun Jun	Guan Xin (College of Marine and Environmental Sciences Tianjin University of Science and Technology Tianjin China.); Jia Dai (College of Marine and Environmental Sciences Tianjin University of Science and Technology Tianjin China. Electronic address: jia-d11@tust.edu.cn.); Liu Xinyu (College of Marine and Environmental Sciences Tianjin University of Science and Technology Tianjin China.); Ding Ch…	Jia Dai (Tianjin University of Science and Technology); Sun Jun (Tianjin University of Science and Technology; China University of Geosciences)	Guan Xin (Tianjin University of Science and Technology); Jia Dai (Tianjin University of Science and Technology); Liu Xinyu (Tianjin University of Science and Technology); Ding Changling (Tianjin University of Science and Technology; China University of Geosciences); Guo Jinfei (Tianjin University of Science and Technology); Yao Min (Jiangsu Hydrology and Water Resources Survey Bureau Nanjing Chin…	0	0				https://app.dimensions.ai/details/publication/pub.1172768785	31 Biological Sciences; 3103 Ecology; 3107 Microbiology; 41 Environmental Sciences; 4102 Ecological Applications; 4105 Pollution and Contamination	14 Life Below Water
4898	pub.1148517619	10.1080/00480169.2022.2087784	35673970		Exploring fungal diversity in Antarctic wildlife: isolation and molecular identification of culturable fungi from penguins and pinnipeds	AIMS: To survey the diversity of fungal species that may be cultured from Antarctic penguins and pinnipeds and to test the in vitro susceptibility to triazole drugs of any medically important Aspergillus spp. isolates._x000D_ METHODS: During an expedition to Argentinean Antarctic research stations at Potter Peninsula (South Shetland Islands) and Primavera Cape (Antarctic Peninsula) in February 20…	This study was supported by grants from the Agencia Nacional de Promoción Científica y Tecnológica (ANPCyT Grant PICT 2018-02186) and for the logistics of travelling to Antarctica from the Instituto Antártico Argentino and the Dirección Nacional del Antártico. MLC MMM and LR are members of the Argentinean Research Council (CONICET). MAT and TBD express their thanks to CONICET for doctoral scholar…		New Zealand Veterinary Journal			Agar; Animals; Animals Wild; Antarctic Regions; Caniformia; Fungi; Fur Seals; Glucose; Humans; Seals Earless; Spheniscidae	2022-07-04	2022	2022-07-04	2022-09-03	70	5	263-272	All OA; Green	Article	Devoto T Brito; Toscanini MA; Alava K Hermida; Etchecopaz AN; Pola SJ; Martorell MM; Ansaldo M; Negrete J; Ruberto L; Mac Cormack W; Cuestas ML	Devoto T Brito (CONICET Instituto de Investigaciones en Microbiología y Parasitología Médica (IMPaM) Universidad de Buenos Aires Buenos Aires Argentina); Toscanini MA (CONICET Instituto de Investigaciones en Microbiología y Parasitología Médica (IMPaM) Universidad de Buenos Aires Buenos Aires Argentina; CONICET Instituto de Nanobiotecnología (NANOBIOTEC) Universidad de Buenos Aires Buenos Aires A…	Cuestas ML (University of Buenos Aires; National Scientific and Technical Research Council)	Devoto T Brito (University of Buenos Aires; National Scientific and Technical Research Council); Toscanini MA (University of Buenos Aires; National Scientific and Technical Research Council; University of Buenos Aires; National Scientific and Technical Research Council); Alava K Hermida (University of Buenos Aires; National Scientific and Technical Research Council); Etchecopaz AN (University of …	6	6	1.49	5.84	https://figshare.com/articles/journal_contribution/Exploring_fungal_diversity_in_Antarctic_wildlife_isolation_and_molecular_identification_of_culturable_fungi_from_penguins_and_pinnipeds/20025252/2/files/36148577.pdf	https://app.dimensions.ai/details/publication/pub.1148517619	30 Agricultural Veterinary and Food Sciences; 3009 Veterinary Sciences
4816	pub.1033504439	10.1007/s00248-013-0302-4	24173537		Brazilian Microbiome Project: Revealing the Unexplored Microbial Diversity—Challenges and Prospects	The Brazilian Microbiome Project (BMP) aims to assemble a Brazilian Metagenomic Consortium/Database. At present many metagenomic projects underway in Brazil are widely known. Our goal in this initiative is to co-ordinate and standardize these together with new projects to come. It is estimated that Brazil hosts approximately 20 % of the entire world’s macroorganism biological diversity. It is 1 o…	We gratefully acknowledge our peer reviewers for the critical comments and suggestions on earlier drafts of the manuscript. We also would like to thank all members of the BMP advisory board as well as all partner companies.		Microbial Ecology			Advisory Committees; Animals; Biodiversity; Brazil; Databases Factual; Metagenome; Microbiota; Plants; Soil Microbiology	2013-10-31	2013	2013-10-31	2014-02	67	2	237-241	All OA; Green	Article	Pylro Victor Satler; Roesch Luiz Fernando Wurdig; Ortega José Miguel; do Amaral Alexandre Morais; Tótola Marcos Rogério; Hirsch Penny Ruth; Rosado Alexandre Soares; Góes-Neto Aristóteles; da Costa da Silva Artur Luiz; Rosa Carlos Augusto; Morais Daniel Kumazawa; Andreote Fernando Dini; Duarte Gabriela Frois; de Melo Itamar Soares; Seldin Lucy; Lambais Márcio Rodrigues; Hungria Mariangela; Peixoto…	Pylro Victor Satler (Microbiology Department Federal University of Vicosa 365700-000 Vicosa Minas Gerais Brazil; Department of AgroEcology Rothamsted Research AL5 2JQ Harpenden UK); Roesch Luiz Fernando Wurdig (Federal University of Pampa 97300-000 Sao Gabriel Rio Grande do Sul Brazil); Ortega José Miguel (Biochemical and Immunology Department Federal University of Minas Gerais 31270-010 Belo Hor…	Pylro Victor Satler (Universidade Federal de Viçosa; Rothamsted Research)	Pylro Victor Satler (Universidade Federal de Viçosa; Rothamsted Research); Roesch Luiz Fernando Wurdig (Universidade Federal do Pampa); Ortega José Miguel (Universidade Federal de Minas Gerais); do Amaral Alexandre Morais (Rothamsted Research); Tótola Marcos Rogério (Universidade Federal de Viçosa); Hirsch Penny Ruth (Rothamsted Research); Rosado Alexandre Soares (Federal University of Rio de Jan…	109	9	2.67	11.2	http://ainfo.cnptia.embrapa.br/digital/bitstream/item/112036/1/2014AP020.pdf	https://app.dimensions.ai/details/publication/pub.1033504439	31 Biological Sciences; 3103 Ecology	15 Life on Land
4810	pub.1131004587	10.1016/j.biortech.2020.124148	32987279		Microbial community and function evaluation in the start-up period of bioaugmented SBR fed with aniline wastewater	An enhanced sequencing batch reactor (SBR) system was developed to treat synthetic wastewater rich in 600 mg/L aniline. The aniline degradation efficiency was almost 100% and the total nitrogen (TN) removal rate was more than 50%. Metagenomics technology revealed the community structure functional genes and metabolic mechanism during the start-up of the enhanced reactor. Sequencing results showed…	This work was supported by the Natural Science Foundation of China (NSFC) (No. 51208397) and the Fundamental Research Funds for the Central Universities (WUT: 2019III105CG).		Bioresource Technology			Aniline Compounds; Bioreactors; Denitrification; Microbiota; Nitrification; Nitrogen; Sewage; Waste Disposal Fluid; Wastewater	2020-09-21	2020	2020-09-21	2021-01	319		124148	Closed	Article	Zhang Wenli; Zhang Qian; Li Meng; Wang Hongyu; Li Yao; Peng Haojin; Feng Jiapeng	Zhang Wenli (School of Civil Engineering and Architecture Wuhan University of Technology Wuhan 430070 PR China.); Zhang Qian (School of Civil Engineering and Architecture Wuhan University of Technology Wuhan 430070 PR China. Electronic address: qianzhang@whut.edu.cn.); Li Meng (School of Civil Engineering and Architecture Wuhan University of Technology Wuhan 430070 PR China.); Wang Hongyu (School…	Zhang Qian (Wuhan University of Technology)	Zhang Wenli (Wuhan University of Technology); Zhang Qian (Wuhan University of Technology); Li Meng (Wuhan University of Technology); Wang Hongyu (Wuhan University); Li Yao (Wuhan University of Technology); Peng Haojin (Wuhan University of Technology); Feng Jiapeng (Wuhan University of Technology)	50	24	3.99	8.75		https://app.dimensions.ai/details/publication/pub.1131004587	30 Agricultural Veterinary and Food Sciences; 3001 Agricultural Biotechnology; 31 Biological Sciences; 3106 Industrial Biotechnology; 3107 Microbiology
4761	pub.1171365050	10.1016/j.chemosphere.2024.142169	38710416		Biodegradation of polyurethanes by Staphylococcus warneri and by microbial co-culture	With the increasing production and use of polyurethanes (PUs) it is necessary to develop sustainable techniques for the remediation of plastic pollution. The use of microorganisms capable of biodegrading PUs may be an environmentally desirable solution for controlling these plastic contaminants. To contribute to the discovery of alternatives for the mitigation of plastics in the environment this …	Declaration of competing interest The authors declare that they have no known competing financial interests or personal relationships that could have appeared to influence the work reported in this paper. Acknowledgments The authors acknowledge Conselho Nacional de Desenvolvimento Científico e Tecnológico (CNPq) and Coordenação de Aperfeiçoamento de Pessoal de Nível Superior (CAPES) for financial…		Chemosphere			Biodegradation Environmental; Polyurethanes; Coculture Techniques; Staphylococcus; Biofilms; Plastics; Serratia liquefaciens	2024-05-04	2024	2024-05-04	2024-07	359		142169	Closed	Article	Salgado Cleonice Aparecida; Pereira Vidigal Pedro Marcus; Dantas Vanetti Maria Cristina	Salgado Cleonice Aparecida (Departamento de Microbiologia Universidade Federal de Viçosa (UFV) Viçosa 36.570-900 MG Brazil. Electronic address: cleonice.salgado@ufv.br.); Pereira Vidigal Pedro Marcus (Núcleo de Análise de Biomoléculas Universidade Federal de Viçosa Viçosa 36.570-900 MG Brazil. Electronic address: pedro.vidigal@ufv.br.); Dantas Vanetti Maria Cristina (Departamento de Microbiologia…	Dantas Vanetti Maria Cristina (Universidade Federal de Viçosa)	Salgado Cleonice Aparecida (Universidade Federal de Viçosa); Pereira Vidigal Pedro Marcus (Universidade Federal de Viçosa); Dantas Vanetti Maria Cristina (Universidade Federal de Viçosa)	0	0				https://app.dimensions.ai/details/publication/pub.1171365050	31 Biological Sciences; 3107 Microbiology; 41 Environmental Sciences
4571	pub.1137689748	10.3390/molecules26092664	34062889	PMC8125633	Microbiological Study in Petrol-Spiked Soil	The pollution of arable lands and water with petroleum-derived products is still a valid problem mainly due the extensive works aimed to improve their production technology to reduce fuel consumption and protect engines. An example of the upgraded fuels is the BP 98 unleaded petrol with Active technology. A pot experiment was carried out in which Eutric Cambisol soil was polluted with petrol to d…		The results presented in this paper were obtained as part of a comprehensive study financed by the University of Warmia and Mazury in Olsztyn Faculty of Agriculture and Forestry Department of Soil Science and Microbiology (grant No. 30.610.006-110) and the project was financially supported by Minister of Science and Higher Education in the range of the programme entitled “Regional Initiative of E…	Molecules		Massimiliano Fenice Susanna Gorrasi	Actinobacteria; Actinomycetales; Biodegradation Environmental; Environmental Monitoring; Environmental Pollutants; Gasoline; Hydrocarbons; Metagenome; Microbiota; Petroleum Pollution; Soil Microbiology; Soil Pollutants	2021-05-01	2021	2021-05-01		26	9	2664	All OA; Gold	Article	Borowik Agata; Wyszkowska Jadwiga; Kucharski Jan	Borowik Agata (Department of Soil Science and Microbiology University of Warmia and Mazury in Olsztyn 10-727 Olsztyn Poland.); Wyszkowska Jadwiga (Department of Soil Science and Microbiology University of Warmia and Mazury in Olsztyn 10-727 Olsztyn Poland.); Kucharski Jan (Department of Soil Science and Microbiology University of Warmia and Mazury in Olsztyn 10-727 Olsztyn Poland.)	Wyszkowska Jadwiga (University of Warmia and Mazury in Olsztyn)	Borowik Agata (University of Warmia and Mazury in Olsztyn); Wyszkowska Jadwiga (University of Warmia and Mazury in Olsztyn); Kucharski Jan (University of Warmia and Mazury in Olsztyn)	11	4	1.3	1.98	https://www.mdpi.com/1420-3049/26/9/2664/pdf?version=1619863598	https://app.dimensions.ai/details/publication/pub.1137689748	34 Chemical Sciences; 3404 Medicinal and Biomolecular Chemistry; 3405 Organic Chemistry
4533	pub.1154510792	10.1016/j.jenvman.2023.117246	36642048		A novel dehydrocoenzyme activator combined with a composite microbial agent TY for enhanced bioremediation of crude oil-contaminated soil	Bioaugmentation (BA) and biostimulation (BS) synergistic remediation is an effective remediation strategy for oil-contaminated soil. In this study the optimal combination system of composite microbial agent TY (Achromobacter: Pseudomona = 2:1) and dehydrocoenzyme activator (NaNO3 (7.0 g/L) (NH4)2HPO4 (1.0 g/L) riboflavin (6.0 mg/L)) was screened. Under the best combination system the degradation …	The study was supported by the Independent Project Program of State Key Laboratory of Petroleum Pollution Control (Grant No. PPC2018014) CNPC Research Institute of Safety and Environmental Technology.		Journal of Environmental Management			Biodegradation Environmental; Hydrocarbons; Oxidoreductases; Phylogeny; Pseudomonas; Soil; Soil Microbiology; Soil Pollutants; Petroleum Pollution	2023-01-13	2023	2023-01-13	2023-04	331		117246	Closed	Article	Liu Qiyou; Sun Shuo; Chen Shuiquan; Su Yuhua; Wang Yaru; Tang Fang; Zhao Chaocheng; Li Lin	Liu Qiyou (College of Chemistry and Chemical Engineering China University of Petroleum (East China) Qingdao 266580 PR China; State Key Laboratory of Petroleum Pollution Control Qingdao 266580 PR China. Electronic address: liuqiyou@upc.edu.cn.); Sun Shuo (College of Chemistry and Chemical Engineering China University of Petroleum (East China) Qingdao 266580 PR China; State Key Laboratory of Petrol…	Liu Qiyou (China University of Petroleum East China; College of Chemistry and Chemical Engineering China University of Petroleum (East China) Qingdao 266580 PR China; State Key Laboratory of Petroleum Pollution Control Qingdao 266580 PR China. Electronic address: liuqiyou@upc.edu.cn.)	Liu Qiyou (China University of Petroleum East China; College of Chemistry and Chemical Engineering China University of Petroleum (East China) Qingdao 266580 PR China; State Key Laboratory of Petroleum Pollution Control Qingdao 266580 PR China. Electronic address: liuqiyou@upc.edu.cn.); Sun Shuo (China University of Petroleum East China; College of Chemistry and Chemical Engineering China Universi…	6	6				https://app.dimensions.ai/details/publication/pub.1154510792	41 Environmental Sciences; 4103 Environmental Biotechnology; 4105 Pollution and Contamination
4510	pub.1045524878	10.1155/2016/1259608	27829818	PMC5086508	Archaea in Natural and Impacted Brazilian Environments	In recent years archaeal diversity surveys have received increasing attention. Brazil is a country known for its natural diversity and variety of biomes which makes it an interesting sampling site for such studies. However archaeal communities in natural and impacted Brazilian environments have only recently been investigated. In this review based on a search on the PubMed database on the last we…			Archaea			Archaea; Biodiversity; Brazil; Environmental Microbiology	2016-10-17	2016	2016-10-17	2016	2016		1259608	All OA; Gold	Article	Rodrigues Thiago; Belmok Aline; Catão Elisa; Kyaw Cynthia Maria	Rodrigues Thiago (Department of Cell Biology Biological Sciences Institute University of Brasília 70910-900 Brasília DF Brazil); Belmok Aline (Department of Cell Biology Biological Sciences Institute University of Brasília 70910-900 Brasília DF Brazil); Catão Elisa (Department of Cell Biology Biological Sciences Institute University of Brasília 70910-900 Brasília DF Brazil); Kyaw Cynthia Maria (D…	Kyaw Cynthia Maria (University of Brasília)	Rodrigues Thiago (University of Brasília); Belmok Aline (University of Brasília); Catão Elisa (University of Brasília); Kyaw Cynthia Maria (University of Brasília)	8	1	0.21	0.76	http://downloads.hindawi.com/journals/archaea/2016/1259608.pdf	https://app.dimensions.ai/details/publication/pub.1045524878	31 Biological Sciences; 3107 Microbiology
4482	pub.1006198883	10.1007/s00248-015-0573-z	25666537		Multiple Symbiodinium Strains Are Hosted by the Brazilian Endemic Corals Mussismilia spp.	Corals of genus Mussismilia (Mussidae) are one of the oldest extant clades of scleractinians. These Neogene relicts are endemic to the Brazilian coast and represent the main reef-building corals in the Southwest Atlantic Ocean (SAO). The relatively low-diversity/high-endemism SAO coralline systems are under rapid decline from emerging diseases and other local and global stressors but have not bee…	The authors thank CNPq CAPES and FAPERJ for the core financial support to this work and Mr. Bruno Maia for technical assistance in the flow cytometer. The Abrolhos National Marine Park (ICMBio Ministry of Environment) Brazilian Navy Conservation International and the Rede Abrolhos (www.abrolhos.org) contributed with permits logistics and field support in Abrolhos and Trindade Island.		Microbial Ecology			Animals; Anthozoa; Atlantic Ocean; Brazil; Coral Reefs; Dinoflagellida; Symbiosis	2015-02-10	2015	2015-02-10	2015-08	70	2	301-310	Closed	Article	Silva-Lima Arthur W.; Walter Juline M.; Garcia Gizele D.; Ramires Naiara; Ank Glaucia; Meirelles Pedro M.; Nobrega Alberto F.; Siva-Neto Inacio D.; Moura Rodrigo L.; Salomon Paulo S.; Thompson Cristiane C.; Thompson Fabiano L.	Silva-Lima Arthur W. (Laboratório de Microbiologia Instituto de Biologia Universidade Federal do Rio de Janeiro (UFRJ) Av. Carlos Chagas Fo. S/N - CCS - IB - Lab de Microbiologia - BLOCO A (Anexo) A3 - sl 102 Cidade Universitária 21941-599 Rio de Janeiro RJ Brazil); Walter Juline M. (Laboratório de Microbiologia Instituto de Biologia Universidade Federal do Rio de Janeiro (UFRJ) Av. Carlos Chagas…	Thompson Fabiano L. (Federal University of Rio de Janeiro; Sage/Coppe Centro de Gestão Tecnológica–CT2 Rua Moniz de Aragão no.360 - Bloco 2 Ilha do Fundão - Cidade Universitária 21.941-972 Rio de Janeiro Brazil)	Silva-Lima Arthur W. (Federal University of Rio de Janeiro); Walter Juline M. (Federal University of Rio de Janeiro); Garcia Gizele D. (Federal University of Rio de Janeiro); Ramires Naiara (Federal University of Rio de Janeiro); Ank Glaucia (Federal University of Rio de Janeiro); Meirelles Pedro M. (Federal University of Rio de Janeiro); Nobrega Alberto F. (Federal University of Rio de Janeiro);…	24	4	0.44	2.79		https://app.dimensions.ai/details/publication/pub.1006198883	31 Biological Sciences; 3103 Ecology; 41 Environmental Sciences; 4104 Environmental Management	14 Life Below Water
4474	pub.1127391920	10.1007/s13205-020-02231-3	32399382	PMC7200953	The draft genome of Staphylococcus warneri TRPF4 a bacteriocin producer with potent activity against the causative agent of Legionnaires' Disease	In this work we present the draft genome sequence of Staphylococcus warneri strain TRPF4 consisting of 2 634 550 bp with a G + C content of 32.4%. The genome sequence includes 2466 protein-coding genes 11 rRNAs and 62 tRNAs in 33 contigs. Applying the Rapid Annotation using Subsystem Technology (RAST) a total of 1322 protein-coding genes were assigned to 393 subsystems. Also a set of 1286 protein…	We would like to thank the Brazilian Navy Captain Sidnei da Costa Abrantes for the logistic support while collecting samples to the Núcleo de Análise de Biomoléculas of the Universidade Federal de Viçosa for providing the facilities for the conduction of the experiments and to Maria Aparecida Scatamburlo Moreira to providing the mammalians cells lines and the Laboratório de Doenças Bacterianas fa…		3 Biotech				2020-05-06	2020	2020-05-06	2020-05	10	5	232	All OA; Green	Article	Freitas Fernanda de Souza; Vidigal Pedro Marcus Pereira; Siqueira Tatiane de Paula; de Barros Mariana; Tótola Marcos Rogério	Freitas Fernanda de Souza (Departamento de Microbiologia Laboratório de Biotecnologia e Biodiversidade Para o Meio Ambiente Universidade Federal de Viçosa Peter Henry Rolfs Avenue w/n Viçosa MG Brazil); Vidigal Pedro Marcus Pereira (Núcleo de Análise de Biomoléculas Centro de Ciências Biológicas Universidade Federal de Viçosa Peter Henry Rolfs Avenue w/n Viçosa MG Brazil); Siqueira Tatiane de Pau…	Freitas Fernanda de Souza (Universidade Federal de Viçosa)	Freitas Fernanda de Souza (Universidade Federal de Viçosa); Vidigal Pedro Marcus Pereira (Universidade Federal de Viçosa); Siqueira Tatiane de Paula (Universidade Federal de Viçosa); de Barros Mariana (Universidade Federal de Viçosa); Tótola Marcos Rogério (Universidade Federal de Viçosa)	1	1		0.18	https://www.ncbi.nlm.nih.gov/pmc/articles/PMC7200953	https://app.dimensions.ai/details/publication/pub.1127391920	31 Biological Sciences; 3105 Genetics; 3107 Microbiology
4146	pub.1072396918	10.4238/vol8-1gmr570	19283688		Detection of polymorphisms of the mtDNA control region of Caretta caretta (Testudines: Cheloniidae) by PCR-SSCP	Marine turtles are increasingly being threatened worldwide by anthropogenic activities. Better understanding of their life cycle behavior and population structure is imperative for the design of adequate conservation strategies. The mtDNA control region is a fast-evolving matrilineal marker that has been employed in the study of marine turtle populations. We developed and tested a simple molecula…			Genetics and Molecular Research			Animals; DNA Mitochondrial; Geography; Polymerase Chain Reaction; Polymorphism Genetic; Polymorphism Single-Stranded Conformational; Turtles	2009-02-25	2009	2009-02-25	2009	8	1	215-222	All OA; Bronze	Article	Reis E C; Albano R M; Bondioli A C V; Soares L S; Lôbo-Hajdu G	Reis E C (Departamento de Genética Universidade do Estado do Rio de Janeiro Rio de Janeiro RJ Brazil. est.cardinot@gmail.com); Albano R M (); Bondioli A C V (); Soares L S (); Lôbo-Hajdu G ()		Reis E C (Rio de Janeiro State University); Albano R M (); Bondioli A C V (); Soares L S (); Lôbo-Hajdu G ()	3	0	0.05	0.24	https://doi.org/10.4238/vol8-1gmr570	https://app.dimensions.ai/details/publication/pub.1072396918	31 Biological Sciences; 3103 Ecology; 3105 Genetics	15 Life on Land
4017	pub.1099687171	10.1016/j.ijfoodmicro.2017.12.014	29278825		Nematode parasites of commercially important fish from the southeast coast of Brazil: Morphological and genetic insight	Studies of nematofauna of teleost fish from the Brazilian coast are relatively scarce and limited to identification based on morphology. The objective of the present study was to determine the diversity and prevalence of nematode parasites in teleost fish from the southeast Atlantic coast of Rio de Janeiro through morphological molecular and ecological approaches. Parasites were collected from si…	We are grateful to Melissa Q. Cárdenas and Simone C. Cohen from the Laboratory of Fish Parasites Oswaldo Cruz Institute for initial help in specimen identification and providing physical space for fish necropsies. This study was supported by Coordenação de Aperfeiçoamento de Pessoal de Nível Superior (CAPES; grant number 032/2010). We are grateful to the Conselho Nacional de Desenvolvimento Cient…		International Journal of Food Microbiology			Animals; Brazil; DNA Mitochondrial; DNA Ribosomal; Fish Diseases; Nematoda; Nematode Infections; Perciformes	2017-12-16	2017	2017-12-16	2018-02	267		29-41	Closed	Article	Di Azevedo Maria Isabel N.; Iñiguez Alena M.	Di Azevedo Maria Isabel N. (LABTRIP Instituto Oswaldo Cruz Fundação Oswaldo Cruz Rio de Janeiro 21045-900 Brazil); Iñiguez Alena M. (LABTRIP Instituto Oswaldo Cruz Fundação Oswaldo Cruz Rio de Janeiro 21045-900 Brazil)	Iñiguez Alena M. (Oswaldo Cruz Foundation)	Di Azevedo Maria Isabel N. (Oswaldo Cruz Foundation); Iñiguez Alena M. (Oswaldo Cruz Foundation)	6	0	0.72	1.17		https://app.dimensions.ai/details/publication/pub.1099687171	30 Agricultural Veterinary and Food Sciences; 3005 Fisheries Sciences; 31 Biological Sciences
3973	pub.1110262222	10.1111/jam.14166	30489677		Analysis of a phenol‐adapted microbial community: degradation capacity taxonomy and metabolic description	AIMS: In this study the ability of the consortium MR-01 to degrade phenol was determined. The effects of this chemical on the taxonomy and the metabolic behaviour were analysed through metagenomics._x000D_ METHODS AND RESULTS: Consortium MR-01 was acclimated in a sublethal concentration of phenol. After this process the capacity to degrade this molecule was analysed. Results showed that degradati…			Journal of Applied Microbiology			Bacteria; Bacterial Proteins; Biodegradation Environmental; Metagenomics; Microbiota; Mixed Function Oxygenases; Phenol; Phylogeny	2019-01-02	2019	2019-01-02	2019-03	126	3	771-779	Closed	Article	Sánchez‐González M.; Álvarez‐Uribe H.; Rivera‐Solís R.; González‐Burgos A.; Escalante‐Réndiz D.; Rojas‐Herrera R.	Sánchez‐González M. (Facultad de Ingeniería Química Universidad Autónoma de Yucatán Mérida Yucatán México); Álvarez‐Uribe H. (Facultad de Ingeniería Química Universidad Autónoma de Yucatán Mérida Yucatán México); Rivera‐Solís R. (Facultad de Ingeniería Química Universidad Autónoma de Yucatán Mérida Yucatán México); González‐Burgos A. (Facultad de Ingeniería Química Universidad Autónoma de Yucatán…	Rojas‐Herrera R. (Autonomous University of Yucatán)	Sánchez‐González M. (Autonomous University of Yucatán); Álvarez‐Uribe H. (Autonomous University of Yucatán); Rivera‐Solís R. (Autonomous University of Yucatán); González‐Burgos A. (Autonomous University of Yucatán); Escalante‐Réndiz D. (Autonomous University of Yucatán); Rojas‐Herrera R. (Autonomous University of Yucatán)	6	3	0.17	0.77		https://app.dimensions.ai/details/publication/pub.1110262222	31 Biological Sciences; 3107 Microbiology
3972	pub.1038531212	10.1016/j.margen.2016.04.004	27107724		Genome sequence of Roseivirga sp. strain D-25 and its potential applications from the genomic aspect	Roseivirga sp. strain D-25 is an aerobic marine bacterium isolated from seawater collected from Desaru beach Malaysia. To date the genus Roseivirga consists of only four species with no genome sequence reported. Here we present the genome sequence of Roseivirga sp. strain D-25 (=KCTC 42709=DSM 101709) with a genome size of approximately 4.08Mbp and G+C content of 39.18%. Genome sequence analysis …	This work was supported by Ministry of Education Malaysia FRGS grant and Universiti Teknologi Malaysia RU grant under project number of 4F265 and 07H43 respectively. Chitra Selvaratnam and Suganthi Thevarajoo acknowledge PhD Zamalah scholarship from Universiti Teknologi Malaysia. Kok-Gan Chan acknowledges University of Malaya High Impact Research Grants (UM.C/625/1/HIR/MOHE/CHAN/01 Grant No. A-00…		Marine Genomics			Bacteroidetes; Genome Bacterial; Malaysia; Seawater; Sequence Analysis DNA	2016-04-20	2016	2016-04-20	2016-08	28		29-31	Closed	Article	Selvaratnam Chitra; Thevarajoo Suganthi; Ee Robson; Chan Kok-Gan; Bennett Joseph P.; Goh Kian Mau; Chong Chun Shiong	Selvaratnam Chitra (Faculty of Biosciences and Medical Engineering Universiti Teknologi Malaysia 81310 Skudai Johor Malaysia); Thevarajoo Suganthi (Faculty of Biosciences and Medical Engineering Universiti Teknologi Malaysia 81310 Skudai Johor Malaysia); Ee Robson (Division of Genetics and Molecular Biology Institute of Biological Sciences Faculty of Science University of Malaya 50603 Kuala Lumpu…	Chong Chun Shiong (University of Technology Malaysia; University of York)	Selvaratnam Chitra (University of Technology Malaysia); Thevarajoo Suganthi (University of Technology Malaysia); Ee Robson (University of Malaya); Chan Kok-Gan (University of Malaya); Bennett Joseph P. (University of York); Goh Kian Mau (University of Technology Malaysia); Chong Chun Shiong (University of Technology Malaysia; University of York)	8	1	0.14	0.83		https://app.dimensions.ai/details/publication/pub.1038531212	31 Biological Sciences; 3105 Genetics; 3107 Microbiology	14 Life Below Water
3967	pub.1123286679	10.1007/s00792-019-01151-2	31823065		Extreme environments: a source of biosurfactants for biotechnological applications	The surfactant industry moves billions of dollars a year and consists of chemically synthesized molecules usually derived from petroleum. Surfactant is a versatile molecule that is widely used in different industrial areas with an emphasis on the petroleum biomedical and detergent industries. Recently interest in environmentally friendly surfactants that are resistant to extreme conditions has in…	The authors would like to thank the National Council for Scientific and Technological Development (CNPq) the National Council for the Improvement of Higher Education (CAPES) and the Carlos Chagas Filho Foundation for Research Support of Rio de Janeiro State (FAPERJ) for financial support.		Extremophiles			Bacteria; Biotechnology; Extreme Environments; Petroleum; Surface-Active Agents	2019-12-11	2019	2019-12-11	2020-03	24	2	189-206	Closed	Article	Schultz Júnia; Rosado Alexandre Soares	Schultz Júnia (Laboratory of Molecular Microbial Ecology Institute of Microbiology Paulo de Góes Federal University of Rio de Janeiro (UFRJ) Av. Carlos Chagas Filho 373 CCS Bloco E Subsolo Ilha Do Fundão 21941-902 Rio de Janeiro Brazil); Rosado Alexandre Soares (Laboratory of Molecular Microbial Ecology Institute of Microbiology Paulo de Góes Federal University of Rio de Janeiro (UFRJ) Av. Carlos…	Rosado Alexandre Soares (Federal University of Rio de Janeiro)	Schultz Júnia (Federal University of Rio de Janeiro); Rosado Alexandre Soares (Federal University of Rio de Janeiro)	76	39	3.88	8.14		https://app.dimensions.ai/details/publication/pub.1123286679	31 Biological Sciences; 3106 Industrial Biotechnology	12 Responsible Consumption and Production
3923	pub.1026198582	10.1111/j.1365-294x.2012.05530.x	22432442		Mitogenomic sequences better resolve stock structure of southern Greater Caribbean green turtle rookeries	Analyses of mitochondrial control region polymorphisms have supported the presence of several demographically independent green turtle (Chelonia mydas) rookeries in the Greater Caribbean region. However extensive sharing of common haplotypes based on 490-bp control region sequences confounds assessment of the scale of natal homing and population structure among regional rookeries. We screened the…	This research was funded in part by a grant awarded from the Sea Turtle Grants Program. The Sea Turtle Grants Program is funded from proceeds from the sale of the Florida Sea Turtle License Plate. Learn more at http://www.helpingseaturtles.org. We also gratefully acknowledge funding from the Daniel B. Warnell School of Forestry and Natural Resources. We thank G.F. Solé of Fundación para la Defens…		Molecular Ecology			Animals; Caribbean Region; DNA Mitochondrial; Ecosystem; Female; Genetics Population; Genome Mitochondrial; Haplotypes; Molecular Sequence Data; Polymorphism Single Nucleotide; Sequence Analysis DNA; Turtles	2012-03-20	2012	2012-03-20	2012-05	21	10	2330-2340	Closed	Article	SHAMBLIN BRIAN M.; BJORNDAL KAREN A.; BOLTEN ALAN B.; HILLIS‐STARR ZANDY M.; LUNDGREN IAN; NARO‐MACIEL EUGENIA; NAIRN CAMPBELL J.	SHAMBLIN BRIAN M. (Daniel B. Warnell School of Forestry and Natural Resources University of Georgia Athens GA 30605 USA); BJORNDAL KAREN A. (Archie Carr Center for Sea Turtle Research and Department of Biology University of Florida PO Box 118525 Gainesville FL 32611 USA); BOLTEN ALAN B. (Archie Carr Center for Sea Turtle Research and Department of Biology University of Florida PO Box 118525 Gaine…		SHAMBLIN BRIAN M. (University of Georgia); BJORNDAL KAREN A. (University of Florida); BOLTEN ALAN B. (University of Florida); HILLIS‐STARR ZANDY M. (National Park Service Buck Island Reef National Monument 2100 Church Street #100 Christiansted St. Croix US Virgin Islands); LUNDGREN IAN (National Park Service Buck Island Reef National Monument 2100 Church Street #100 Christiansted St. Croix US Vir…	85	15	1.32	7.42		https://app.dimensions.ai/details/publication/pub.1026198582	31 Biological Sciences; 3103 Ecology; 3105 Genetics
3906	pub.1030760862	10.1128/genomea.01707-15	26941155	PMC4777766	Draft Genome of Rhodococcus rhodochrous TRN7 Isolated from the Coast of Trindade Island Brazil	Here we present a draft genome and annotation of Rhodococcus rhodochrous TRN7 isolated from Trindade Island Brazil which will provide genetic data to benefit the understanding of its metabolism.	We thank the Brazilian Navy and Rodrigo Otoch Chaves for logistic support while collecting samples and for providing the essential structure to transport and store samples. CNPq grant 405544/2012-0 (PROTRINDADE) FAPEMIG and CAPES (PROEX) funded this work. This work is also supported by the Brazilian Microbiome Project (http://brmicrobiome.org).		Microbiology Resource Announcements				2016-03-03	2016	2016-03-03	2016-04-28	4	2	e01707-15	All OA; Gold	Article	Rodrigues Edmo M.; Pylro Victor S.; Dobbler Priscila T.; Victoria Filipe; Roesch Luiz F. W.; Tótola Marcos R.	Rodrigues Edmo M. (Departamento de Microbiologia Laboratório de Biotecnologia e Biodiversidade para o Meio Ambiente Universidade Federal de Viçosa Viçosa Minas Gerais Brazil); Pylro Victor S. (René Rachou Research Centre Genomics and Computational Biology Group CPqRR/FIOCRUZ Belo Horizonte Minas Gerais Brazil); Dobbler Priscila T. (Centro Interdisciplinar de Pesquisas em Biotecnologia CIP-Biotec …	Roesch Luiz F. W. (Universidade Federal do Pampa); Tótola Marcos R. (Universidade Federal de Viçosa)	Rodrigues Edmo M. (Universidade Federal de Viçosa); Pylro Victor S. (René Rachou Research Centre Genomics and Computational Biology Group CPqRR/FIOCRUZ Belo Horizonte Minas Gerais Brazil); Dobbler Priscila T. (Universidade Federal do Pampa); Victoria Filipe (Universidade Federal do Pampa); Roesch Luiz F. W. (Universidade Federal do Pampa); Tótola Marcos R. (Universidade Federal de Viçosa)	2	0	0.14	0.21	https://doi.org/10.1128/genomea.01707-15	https://app.dimensions.ai/details/publication/pub.1030760862	31 Biological Sciences; 3105 Genetics; 3107 Microbiology
3869	pub.1007580696	10.1371/journal.pone.0118180	25738798	PMC4349783	Fish Biodiversity of the Vitória-Trindade Seamount Chain Southwestern Atlantic: An Updated Database	Despite a strong increase in research on seamounts and oceanic islands ecology and biogeography many basic aspects of their biodiversity are still unknown. In the southwestern Atlantic the Vitória-Trindade Seamount Chain (VTC) extends ca. 1 200 km offshore the Brazilian continental shelf from the Vitória seamount to the oceanic islands of Trindade and Martin Vaz. For a long time most of the biolo…	This work is funded by CNPq (http://www.cnpq.br) through projects “Vitória—Trindade Chain: testing the theory for stepping-stone connectivity in reef fishes” (grant 470725/2009-5 to JCJ) “Reef fishes of the insular complex Trindade—Martin Vaz Vitória ES: status recruitment and evolution of assemblages” (grant 557043/2009-3 to JCJ) Vitória-Trindade Chain mesophotic reefs: characterization of marin…	This work is funded by CNPq (http://www.cnpq.br) through projects “Vitória—Trindade Chain: testing the theory for stepping-stone connectivity in reef fishes” (grant 470725/2009-5 to JCJ) “Reef fishes of the insular complex Trindade—Martin Vaz Vitória ES: status recruitment and evolution of assemblages” (grant 557043/2009-3 to JCJ) Vitória-Trindade Chain mesophotic reefs: characterization of marin…	PLOS ONE		Fabiano Thompson	Animals; Atlantic Ocean; Biodiversity; Fishes; Phylogeography	2015-03-04	2015	2015-03-04		10	3	e0118180	All OA; Gold	Article	Pinheiro Hudson T.; Mazzei Eric; Moura Rodrigo L.; Amado-Filho Gilberto M.; Carvalho-Filho Alfredo; Braga Adriana C.; Costa Paulo A. S.; Ferreira Beatrice P.; Ferreira Carlos Eduardo L.; Floeter Sergio R.; Francini-Filho Ronaldo B.; Gasparini João Luiz; Macieira Raphael M.; Martins Agnaldo S.; Olavo George; Pimentel Caio R.; Rocha Luiz A.; Sazima Ivan; Simon Thiony; Teixeira João Batista; Xavier …	Pinheiro Hudson T. (Departamento de Oceanografia e Ecologia Universidade Federal do Espírito Santo Vitória ES Brazil; Current address: Department of Ecology and Evolutionary Biology University of California Santa Cruz Santa Cruz California United States of America and California Academy of Sciences San Francisco California United States of America); Mazzei Eric (Programa de Pós-Graduação em Ecolo…	Pinheiro Hudson T. (Universidade Federal do Espírito Santo; University of California Santa Cruz; California Academy of Sciences)	Pinheiro Hudson T. (Universidade Federal do Espírito Santo; University of California Santa Cruz; California Academy of Sciences); Mazzei Eric (State University of Santa Cruz); Moura Rodrigo L. (Federal University of Rio de Janeiro); Amado-Filho Gilberto M. (Instituto de Pesquisas Jardim Botânico do Rio de Janeiro); Carvalho-Filho Alfredo (Fish Bizz Ltda. São Paulo Brazil); Braga Adriana C. (Feder…	102	19	1.32	11.84	https://journals.plos.org/plosone/article/file?id=10.1371/journal.pone.0118180&type=printable	https://app.dimensions.ai/details/publication/pub.1007580696	31 Biological Sciences; 3103 Ecology; 41 Environmental Sciences; 4104 Environmental Management	15 Life on Land
3757	pub.1166193528	10.3201/eid2912.230903	37987585	PMC10683811	Molecular Detection and Characterization of Mycoplasma spp. in Marine Mammals Brazil - Volume 29 Number 12—December 2023 - Emerging Infectious Diseases journal - CDC	Mycoplasma spp. are wall-less bacteria able to infect mammals and are classified as hemotropic (hemoplasma) and nonhemotropic. In aquatic mammals hemoplasma have been reported in California sea lions (Zalophus californianus) and river dolphins (Inia spp.). We investigated Mycoplasma spp. in blood samples of West Indian manatees (Trichechus manatus) pinnipeds (5 species) and marine cetaceans (18 s…	This study was funded by grants from Coordenação de Aperfeiçoamento de Pessoal de Nível Superior–Brasil (CAPES) Brazilian National Council for Scientific and Technological Development (process nos. 304999/2018-0 165364/2018-1 141868/2019-8) São Paulo Research Foundation (nos. 2018/20956-0 2018/25069-7 and 2019/26794-0) and Society of Marine Mammalogy. C.S. is funded by a fellowship from Juan de l…		Emerging Infectious Diseases			Animals; Mycoplasma; Brazil; Mycoplasma Infections; Caniformia; Mammals; Dolphins; RNA Ribosomal 16S	2023-12	2023		2023-12	29	12	2471-2481	All OA; Gold	Article	Duarte-Benvenuto Aricia; Sacristán Carlos; Ewbank Ana Carolina; Zamana-Ramblas Roberta; Lial Henrique Christino; Silva Samira Costa; Lugo Maria Alejandra Arias; Keid Lara B.; Pessi Caroline F.; Sabbadini José Rubens; Ribeiro Vanessa L.; do Valle Rodrigo del Rio; Bertozzi Carolina Pacheco; Colosio Adriana Castaldo; da Cunha Gomes Ramos Hernani; Sánchez-Sarmiento Angélica María; Ferioli Raquel Bene…	Duarte-Benvenuto Aricia (); Sacristán Carlos (); Ewbank Ana Carolina (); Zamana-Ramblas Roberta (); Lial Henrique Christino (); Silva Samira Costa (); Lugo Maria Alejandra Arias (); Keid Lara B. (); Pessi Caroline F. (); Sabbadini José Rubens (); Ribeiro Vanessa L. (); do Valle Rodrigo del Rio (); Bertozzi Carolina Pacheco (); Colosio Adriana Castaldo (); da Cunha Gomes Ramos Hernani (); Sánchez-…	Duarte-Benvenuto Aricia ()	Duarte-Benvenuto Aricia (); Sacristán Carlos (); Ewbank Ana Carolina (); Zamana-Ramblas Roberta (); Lial Henrique Christino (); Silva Samira Costa (); Lugo Maria Alejandra Arias (); Keid Lara B. (); Pessi Caroline F. (); Sabbadini José Rubens (); Ribeiro Vanessa L. (); do Valle Rodrigo del Rio (); Bertozzi Carolina Pacheco (); Colosio Adriana Castaldo (); da Cunha Gomes Ramos Hernani (); Sánchez-…	2	2			https://wwwnc.cdc.gov/eid/article/29/12/pdfs/23-0903.pdf	https://app.dimensions.ai/details/publication/pub.1166193528	32 Biomedical and Clinical Sciences; 3202 Clinical Sciences; 42 Health Sciences; 4202 Epidemiology; 4203 Health Services and Systems	15 Life on Land
3404	pub.1139170977	10.7717/peerj.11689	34239781	PMC8237827	Feasibility of melting fingerprint obtained from ISSR-HRM curves for marine mammal species identification	Currently species identification of stranded marine mammals mostly relies on morphological features which has inherent challenges. The use of genetic information for marine mammal species identification remains limited therefore new approaches that can contribute to a better monitoring of stranded species are needed. In that context the ISSR-HRM method we have proposed offers a new approach for m…	Financial support for this study was provided by the Royal Jubilee Ph.D. Program Thailand Research Fund (TRF) Faculty of Veterinary Medicine Chiang Mai University Thailand (R000022228). Additional support was obtained from Chiang Mai University through the Research Administration Office which provided necessary budget via the Excellence Center in Veterinary Bioscience (ECVB) Chiang Mai University…		PeerJ		John Berges		2021-06-25	2021	2021-06-25		9		e11689	All OA; Gold	Article	Kriangwanich Wannapimol; Buddhachat Kittisak; Poommouang Anocha; Chomdej Siriwadee; Thitaram Chatchote; Kaewmong Patcharaporn; Kittiwattanawong Kongkiat; Nganvongpanit Korakot	Kriangwanich Wannapimol (Department of Veterinary Biosciences and Public Health Faculty of Veterinary Medicine Chiang Mai University Chiang Mai Thailand); Buddhachat Kittisak (Excellence Center in Veterinary Bioscience Chiang Mai University Chiang Mai Thailand; Department of Biology Faculty of Science Naresuan University Phitsanulok Thailand); Poommouang Anocha (Department of Veterinary Bioscienc…	Thitaram Chatchote (Chiang Mai University); Nganvongpanit Korakot (Chiang Mai University)	Kriangwanich Wannapimol (Chiang Mai University); Buddhachat Kittisak (Chiang Mai University; Naresuan University); Poommouang Anocha (Chiang Mai University); Chomdej Siriwadee (Chiang Mai University; Chiang Mai University); Thitaram Chatchote (Chiang Mai University); Kaewmong Patcharaporn (Department of Marine and Coastal Resources); Kittiwattanawong Kongkiat (Department of Marine and Coastal Res…	3	1		0.89	https://doi.org/10.7717/peerj.11689	https://app.dimensions.ai/details/publication/pub.1139170977	31 Biological Sciences; 3103 Ecology; 3105 Genetics	14 Life Below Water
3254	pub.1142727759	10.1590/1678-4685-gmb-2021-0122	34807969	PMC8608104	A new view on the scenario of karyotypic stasis in Epinephelidae fish: Cytogenetic historical and biogeographic approaches	Epinephelidae (groupers) is an astonishingly diverse group of carnivorous fish widely distributed in reef environments around the world with growing economic importance. The first chromosomal inferences suggested a conservative scenario for the family. However to date this has not been validated using biogeographic and phylogenetic approaches. Thus to estimate karyotype diversification among grou…	The authors would like to thank CNPq (National Council for Scientific and Technological Development) for financial assistance (Process nº 442664/2015-0) CAPES (Coordenação de Aperfeiçoamento de Pessoal de Nível Superior) for the scholarship granted to KDJA to the Instituto Brasileiro do Meio Ambiente e dos Recursos Naturais Renováveis - IBAMA for the license to collect the specimens (Process No. …		Genetics and Molecular Biology				2021	2021	2021		44	4	e20210122	All OA; Gold	Article	Amorim Karlla Danielle Jorge; Costa Gideão Wagner Werneck Félix da; Cioffi Marcelo de Bello; Tanomtong Alongklod; Bertollo Luiz Antônio Carlos; Molina Wagner Franco	Amorim Karlla Danielle Jorge (Universidade Federal do Rio Grande do Norte Departamento de Biologia Celular e Genética Centro de Biociências Natal RN Brazil.); Costa Gideão Wagner Werneck Félix da (Universidade Federal do Rio Grande do Norte Departamento de Biologia Celular e Genética Centro de Biociências Natal RN Brazil.); Cioffi Marcelo de Bello (Universidade Federal de São Carlos Departamento …		Amorim Karlla Danielle Jorge (Federal University of Rio Grande do Norte); Costa Gideão Wagner Werneck Félix da (Federal University of Rio Grande do Norte); Cioffi Marcelo de Bello (Federal University of São Carlos); Tanomtong Alongklod (Khon Kaen University; Khon Kaen University); Bertollo Luiz Antônio Carlos (Federal University of São Carlos); Molina Wagner Franco (Federal University of Rio Gran…	5	4	0.65	1.54	https://www.ncbi.nlm.nih.gov/pmc/articles/PMC8608104	https://app.dimensions.ai/details/publication/pub.1142727759	31 Biological Sciences; 3104 Evolutionary Biology; 3105 Genetics
3233	pub.1152919342	10.1016/j.chemosphere.2022.137367	36427578		A novel chitosan-biochar immobilized microorganism strategy to enhance bioremediation of crude oil in soil	The chitosan-biochar composite is a clean and environmentally friendly immobilized microorganisms carrier. In this study the chitosan-biochar composite as a carrier to immobilize a compound microbial agent contained Pseudomonas aeruginosa and Bacillus licheniformis and investigated its role in the remediation of oil-contaminated soil. When using 1% (v/v) acetic acid 3% (m/v) chitosan solution 0.1…	Authors gratefully acknowledge the financial support from the Independent Project Program of State Key Laboratory of Petroleum Pollution Control (Grant No. PPC2018014) CNPC Research Institute of Safety and Environmental Technology.		Chemosphere			Biodegradation Environmental; Petroleum; Chitosan; Soil; Charcoal; Bacteria; Soil Pollutants; Soil Microbiology	2022-11-22	2022	2022-11-22	2023-02	313		137367	Closed	Article	Liu Qiyou; Wang Yaru; Sun Shuo; Tang Fang; Chen Hongxu; Chen Shuiquan; Zhao Chaocheng; Li Lin	Liu Qiyou (College of Chemistry and Chemical Engineering China University of Petroleum (East China) Qingdao 266580 PR China; State Key Laboratory of Petroleum Pollution Control Qingdao 266580 China. Electronic address: liuqiyou@upc.edu.cn.); Wang Yaru (College of Chemistry and Chemical Engineering China University of Petroleum (East China) Qingdao 266580 PR China; State Key Laboratory of Petroleu…	Liu Qiyou (China University of Petroleum East China; College of Chemistry and Chemical Engineering China University of Petroleum (East China) Qingdao 266580 PR China; State Key Laboratory of Petroleum Pollution Control Qingdao 266580 China. Electronic address: liuqiyou@upc.edu.cn.)	Liu Qiyou (China University of Petroleum East China; College of Chemistry and Chemical Engineering China University of Petroleum (East China) Qingdao 266580 PR China; State Key Laboratory of Petroleum Pollution Control Qingdao 266580 China. Electronic address: liuqiyou@upc.edu.cn.); Wang Yaru (China University of Petroleum East China; College of Chemistry and Chemical Engineering China University…	23	22	2.63	11.75		https://app.dimensions.ai/details/publication/pub.1152919342	41 Environmental Sciences; 4103 Environmental Biotechnology; 4105 Pollution and Contamination
3100	pub.1004314888	10.1016/j.ympev.2016.03.025	27033950		A multilocus molecular phylogeny of Fasciolariidae (Neogastropoda: Buccinoidea)	The neogastropod family Fasciolariidae Gray 1853 - tulips horse-conchs spindles etc. comprises important representatives of tropical and subtropical molluscan assemblages with over 500 species in the subfamilies Fasciolariinae Gray 1853 Fusininae Wrigley 1927 and Peristerniinae Tryon 1880. Fasciolariids have had a rather complicated taxonomical history with several genus names for a long time use…	Most molecular material in this paper originates from numerous shore-based expeditions and deep-sea cruises conducted respectively by MNHN and Pro-Natura International as part of the Our Planet Reviewed programme and by MNHN and IRD as part of the Tropical Deep-Sea Benthos programme. Funders and sponsors include the French Ministry of Foreign Affairs the Philippines Bureau of Fisheries and Aquati…		Molecular Phylogenetics and Evolution			Animals; Biological Evolution; DNA Mitochondrial; Gastropoda; Histones; Phylogeny; RNA Ribosomal 16S; RNA Ribosomal 28S; Sequence Analysis DNA	2016-03-23	2016	2016-03-23	2016-06	99		309-322	Closed	Article	Couto Diogo R.; Bouchet Philippe; Kantor Yuri I.; Simone Luiz R.L.; Giribet Gonzalo	Couto Diogo R. (Museum of Comparative Zoology Department of Organismic and Evolutionary Biology Harvard University 26 Oxford Street Cambridge MA 02138 USA; Laboratorio de Malacologia Museu de Zoologia da Universidade de São Paulo Avenida Nazaré 481 04263-000 São Paulo Brazil); Bouchet Philippe (Institut de Systématique Évolution Biodiversité ISYEB UMR 7205 CNRS MNHN UPMC EPHE Muséum National d’Hi…	Couto Diogo R. (Harvard University; Universidade de São Paulo)	Couto Diogo R. (Harvard University; Universidade de São Paulo); Bouchet Philippe (Institut de Systématique Évolution Biodiversité); Kantor Yuri I. (Russian Academy of Sciences); Simone Luiz R.L. (Universidade de São Paulo); Giribet Gonzalo (Harvard University)	19	3	0.29	2.56		https://app.dimensions.ai/details/publication/pub.1004314888	31 Biological Sciences; 3103 Ecology; 3104 Evolutionary Biology; 3105 Genetics
2878	pub.1164373961	10.1016/j.ympev.2023.107933	37769827		Phylogenetic review of the comb-tooth blenny genus Hypleurochilus in the northwest Atlantic and Gulf of Mexico	As some of the smallest vertebrates yet largest producers of consumed reef biomass cryptobenthic reef fishes serve a disproportionate role in reef ecosystems and are one of the most poorly understood groups of fish. The blenny genera Hypleurochilus and Parablennius are currently considered paraphyletic and the interrelationships of Parablennius have been the focus of recent phylogenetic studies. …	Declaration of Competing Interest The authors declare that they have no known competing financial interests or personal relationships that could have appeared to influence the work reported in this paper. Acknowledgements We would like to thank K. St Clair and the Texas AM University at Galveston Sea Life Facility staff; The Academy of National Sciences Philadelphia (ANSP) Smithsonian Institution…	This research did not receive any specific grant from funding agencies in the public commercial or not-for-profit sectors.	Molecular Phylogenetics and Evolution			Animals; Phylogeny; Ecosystem; Gulf of Mexico; Perciformes; DNA Mitochondrial; Fishes; Bayes Theorem	2023-09-26	2023	2023-09-26	2023-12	189		107933	Closed	Article	Carter Joshua E; Sporre Megan A; Eytan Ron I	Carter Joshua E (Department of Marine Biology Texas A&M University at Galveston 1001 Texas Clipper Road Galveston TX 77554 United States. Electronic address: carterjoshe.1990@gmail.com.); Sporre Megan A (Department of Marine Biology Texas A&M University at Galveston 1001 Texas Clipper Road Galveston TX 77554 United States.); Eytan Ron I (Department of Marine Biology Texas A&M University at Galves…	Carter Joshua E (Texas A&M University at Galveston)	Carter Joshua E (Texas A&M University at Galveston); Sporre Megan A (Texas A&M University at Galveston); Eytan Ron I (Texas A&M University at Galveston)	1	1				https://app.dimensions.ai/details/publication/pub.1164373961	31 Biological Sciences; 3103 Ecology; 3104 Evolutionary Biology; 3105 Genetics
2830	pub.1136050459	10.1007/s10661-021-08952-z	33675444		New benzo(a)pyrene-degrading strains of the Burkholderia cepacia complex prospected from activated sludge in a petrochemical wastewater treatment plant	The prospection of bacteria that are resistant to polyaromatic hydrocarbons (PAH) of activated sludge from a Petrochemical Wastewater Treatment Plant (WWTP) allows investigating potential biodegraders of PAH. For this purpose sludge samples were cultured with benzo(a)pyrene and/or naphthalene as carbon sources. The recovered isolates were characterized by biochemical methods and identified based …			Environmental Monitoring and Assessment			Benzo(a)pyrene; Biodegradation Environmental; Burkholderia cepacia complex; Environmental Monitoring; Sewage; Water Purification	2021-03-06	2021	2021-03-06	2021-04	193	4	163	All OA; Green	Article	Cauduro Guilherme Pinto; Leal Ana Lusia; Marmitt Marcela; de Ávila Letícia Gomes; Kern Gabriela; Quadros Patrícia Dörr; Mahenthiralingam Eshwar; Valiati Victor Hugo	Cauduro Guilherme Pinto (Laboratory of Molecular Biology Programa de Pós-Graduação em Biologia Universidade do Vale do Rio dos Sinos (UNISINOS) Av. Unisinos 950 93022-750 São Leopoldo RS Brazil); Leal Ana Lusia (Superintendence for the Treatment of Wastewater Companhia Riograndense de Saneamento (SITEL/CORSAN) Polo Petroquímico do Sul Triunfo RS Brazil); Marmitt Marcela (Laboratory of Molecular B…	Valiati Victor Hugo (Universidade do Vale do Rio dos Sinos)	Cauduro Guilherme Pinto (Universidade do Vale do Rio dos Sinos); Leal Ana Lusia (Superintendence for the Treatment of Wastewater Companhia Riograndense de Saneamento (SITEL/CORSAN) Polo Petroquímico do Sul Triunfo RS Brazil); Marmitt Marcela (Universidade do Vale do Rio dos Sinos); de Ávila Letícia Gomes (Superintendence for the Treatment of Wastewater Companhia Riograndense de Saneamento (SITEL/…	4	3	0.22	0.59	https://orca.cardiff.ac.uk/140052/1/EMAS-D-20-04060_Revision%20One.pdf	https://app.dimensions.ai/details/publication/pub.1136050459	40 Engineering; 4004 Chemical Engineering; 4011 Environmental Engineering; 41 Environmental Sciences
2611	pub.1025755545	10.1186/2193-1801-3-540	26034669	PMC4447848	Reproductive biology and genetic diversity of the green turtle (Chelonia mydas) in Vamizi island Mozambique	IntroductionVamizi an Island located in the Western Indian Ocean is visited by a small and not fully characterized green turtle (Chelonia mydas (L.)) population. This population is threatened by natural hazards and several human activities which are used to identify conservation priorities for marine turtles.It was our aim to contribute to the knowledge of marine turtles that nest in Vamizi with …	We are grateful to Abreu-Grobois F.A. involved in the transmission of primers sequences Rachid Abudala (Major Dade) responsible for the logistic support and all personnel involved in field work. The authors also thank to the Maluane Conservation Project (Cabo Delgado Tourism Biodiversity and Conservation) that started this work which continues today. We are especially grateful to all institutions…		SpringerPlus				2014-09-19	2014	2014-09-19	2014-12	3	1	540	All OA; Gold	Article	Anastácio Rita; Santos Camila; Lopes Cardoso; Moreira Helena; Souto Luis; Ferrão Jorge; Garnier Julie; Pereira Mário J.	Anastácio Rita (Departamento de Biologia e CESAM Universidade de Aveiro 3810-193 Aveiro Portugal); Santos Camila (Departamento de Biologia e CESAM Universidade de Aveiro 3810-193 Aveiro Portugal); Lopes Cardoso (Maluane - Cabo Delgado Conservation and Tourism Pemba Mozambique); Moreira Helena (Departamento de Biologia e CESAM Universidade de Aveiro 3810-193 Aveiro Portugal); Souto Luis (Departame…	Pereira Mário J. (University of Aveiro; AFPR - A For Plankton Research 3800-365 Aveiro Portugal)	Anastácio Rita (University of Aveiro); Santos Camila (University of Aveiro); Lopes Cardoso (Maluane - Cabo Delgado Conservation and Tourism Pemba Mozambique); Moreira Helena (University of Aveiro); Souto Luis (University of Aveiro); Ferrão Jorge (Maluane - Cabo Delgado Conservation and Tourism Pemba Mozambique; Lúrio University); Garnier Julie (The Zological Society of London Regent’s Park NW1 4R…	17	4	0.22	1.57	https://springerplus.springeropen.com/counter/pdf/10.1186/2193-1801-3-540	https://app.dimensions.ai/details/publication/pub.1025755545	31 Biological Sciences; 3105 Genetics	15 Life on Land
2589	pub.1141445143	10.1016/j.btre.2021.e00678	34660213	PMC8502702	Characterization and genomic analysis of Exiguobacterium alkaliphilum B-3531D an efficient crude oil degrading strain	The aim of the work was to carry out the physiological biochemical and genetic characterization of the Exiguobacterium alkaliphilum B-3531D strain. This strain is promising for use in the field of environmental biotechnology since it has a pronounced ability to utilize crude oil and individual hydrocarbons in a wide temperature range. The genome of the strain was sequenced and completely assemble…	Declaration of Competing Interest Let me inform you that all authors (Yanina Delegan Yulia Kocharovskaya Alexander Bogun Angelika Sizova Viktor Solomentsev Leila Iminova Nikita Lyakhovchenko Alina Zinovieva Mikhail Goyanov Inna Solyanikova) declare that they have no known competing financial interests or personal relationships that could have appeared to influence the work reported in this paper.	All works except genomic sequencing were financially supported by Russian Foundation for Basic Research (Project No: 19–54–80 003). Genome Sequencing was supported by the Ministry of Science and Higher Education of the Russian Federation (agreement number 075–15–2019–1671)	Biotechnology Reports				2021-09-28	2021	2021-09-28	2021-12	32		e00678	All OA; Gold	Article	Delegan Yanina; Kocharovskaya Yulia; Bogun Alexander; Sizova Angelika; Solomentsev Viktor; Iminova Leila; Lyakhovchenko Nikita; Zinovieva Alina; Goyanov Mikhail; Solyanikova Inna	Delegan Yanina (Skryabin Institute of Biochemistry and Physiology of Microorganisms Pushchino Scientific Center for Biological Research of Russian Academy of Sciences Pushchino Moscow Oblast 142290 Russian Federation); Kocharovskaya Yulia (Skryabin Institute of Biochemistry and Physiology of Microorganisms Pushchino Scientific Center for Biological Research of Russian Academy of Sciences Pushchin…	Delegan Yanina (Pushchino Scientific Center for Biological Research)	Delegan Yanina (Pushchino Scientific Center for Biological Research); Kocharovskaya Yulia (Pushchino Scientific Center for Biological Research; Pushchino State Institute of Natural Sciences); Bogun Alexander (State Research Center for Applied Microbiology and Biotechnology); Sizova Angelika (State Research Center for Applied Microbiology and Biotechnology); Solomentsev Viktor (State Research Cent…	9	3	0.79	2.46	https://doi.org/10.1016/j.btre.2021.e00678	https://app.dimensions.ai/details/publication/pub.1141445143	31 Biological Sciences; 3105 Genetics
2589	pub.1123928307	10.1016/j.biortech.2020.122736	31954284		Phenanthrene removal and response of bacterial community in the combined system of photocatalysis and PAH-degrading microbial consortium in laboratory system	This work aimed to study the removal of phenanthrene change of bacterial community and microbial functions through combined photocatalysis and biodegradation under ultraviolet (UV) and visible light illumination. Results showed that phenanthrene removal was enhanced in combined system irradiated by UV and visible light. High-throughput sequencing of 16S rRNA gene manifested that alpha diversity (…	This work was supported by the National Natural Science Foundation of China (Grants No. 51879080 51509129 41371307 41907108) Natural Science Foundation of Jiangsu Province China (BK20171435) National Key Research and Development Program of China (No. 2018YFC0407906) the Open Foundation of State Key Laboratory of Pollution Control and Resource Reuse (Grant No. PCRRF12010) the State Key Laboratory …		Bioresource Technology			Bacteria; Biodegradation Environmental; Microbial Consortia; Phenanthrenes; Polycyclic Aromatic Hydrocarbons; RNA Ribosomal 16S	2020-01-07	2020	2020-01-07	2020-04	301		122736	Closed	Article	Qin Zhirui; Zhao Zhenhua; Jiao Wentao; Han Ziyu; Xia Liling; Fang Yinqing; Wang Shiyu; Ji Longjie; Jiang Ying	Qin Zhirui (Key Laboratory of Integrated Regulation and Resource Development on Shallow Lake of Ministry of Education College of Environment Hohai University Nanjing 210098 China; State Key Laboratory of Urban and Regional Ecology Research Center for Eco-Environmental Sciences Chinese Academy of Sciences Beijing 100085 China); Zhao Zhenhua (Key Laboratory of Integrated Regulation and Resource Dev…	Zhao Zhenhua (Hohai University); Jiao Wentao (Research Center for Eco-Environmental Sciences)	Qin Zhirui (Hohai University; Research Center for Eco-Environmental Sciences); Zhao Zhenhua (Hohai University); Jiao Wentao (Research Center for Eco-Environmental Sciences); Han Ziyu (Research Center for Eco-Environmental Sciences); Xia Liling (Nanjing Institute of Industry Technology); Fang Yinqing (Research Center for Eco-Environmental Sciences); Wang Shiyu (Research Center for Eco-Environmenta…	29	11	1.97	4.55		https://app.dimensions.ai/details/publication/pub.1123928307	31 Biological Sciences; 3107 Microbiology	14 Life Below Water
2566	pub.1128527217	10.1016/j.marpolbul.2020.111364	32658709		The missing sink - quantification categorisation and sourcing of beached macro-debris in the Scottish Orkney Islands	Around the coastline of the UK macro-debris has been observed in average densities of over 700 items per metre. Systematic beach-cleans were conducted at 35 sites around the Scottish Orkney Islands in order to quantify and categorise the level of marine debris found there. Litter was collected from 100 m transects and categorised by its material broad source (terrestrial or marine) and potential …	Declaration of competing interest The authors declare that they have no known competing financial interests or personal relationships that could have appeared to influence the work reported in this paper.		Marine Pollution Bulletin			Environmental Monitoring; Islands; Plastics; Scotland; Waste Products	2020-06-17	2020	2020-06-17	2020-08	157		111364	All OA; Green	Article	Buckingham J.; Capper A.; Bell M.	Buckingham J. (Heriot- Watt University International Centre for Island Technology Stromness Orkney KW16 3AW Scotland United Kingdom of Great Britain and Northern Ireland); Capper A. (Heriot- Watt University International Centre for Island Technology Stromness Orkney KW16 3AW Scotland United Kingdom of Great Britain and Northern Ireland; Central Queensland University Coastal Marine Ecosystems Rese…	Buckingham J. (Heriot- Watt University International Centre for Island Technology Stromness Orkney KW16 3AW Scotland United Kingdom of Great Britain and Northern Ireland)	Buckingham J. (Heriot- Watt University International Centre for Island Technology Stromness Orkney KW16 3AW Scotland United Kingdom of Great Britain and Northern Ireland); Capper A. (Heriot- Watt University International Centre for Island Technology Stromness Orkney KW16 3AW Scotland United Kingdom of Great Britain and Northern Ireland; Central Queensland University); Bell M. (Heriot- Watt Univer…	8	3	0.62	0.99	https://hull-repository.worktribe.com/preview/1323970/51%20Tang%20et%20al%20plastics%20in%20sediment.pdf	https://app.dimensions.ai/details/publication/pub.1128527217	41 Environmental Sciences; 4105 Pollution and Contamination	14 Life Below Water
2507	pub.1143835146	10.1016/j.jenvman.2021.114265	34915391		Improving soil fertility by driving microbial community changes in saline soils of Yellow River Delta under petroleum pollution	It is promising to use indigenous microorganisms for fertility improvement in petroleum-contaminated coastal soil. As a result the microbial community and physicochemical property are the base for the restoration. For the detailed information the Phragmites Communis (P) Chinese Tamarisk (C) Suaeda salsa (S) and new Bare Land (B) soil of Yellow River Delta was 90 g in 100 mL sterile bottles simula…	This work was jointly supported by the National Natural Science Foundation of China (grant numbers 41673112 and 31702345) Qingdao Postdoctoral Applied Research Project and Nitrogen Elements Change among Vegetation Restoration Wetland of Coastal Zones in Shandong Province (CF-MEEC/ER/2020–09).		Journal of Environmental Management			Biodegradation Environmental; Microbiota; Petroleum; Petroleum Pollution; Rivers; Soil; Soil Microbiology; Soil Pollutants	2021-12-13	2021	2021-12-13	2022-02	304		114265	Closed	Article	Wang Bingchen; Kuang Shaoping; Shao Hongbo; Cheng Fei; Wang Huihui	Wang Bingchen (College of Environment and Safety Engineering Qingdao University of Science and Technology Qingdao 266042 PR China.); Kuang Shaoping (College of Environment and Safety Engineering Qingdao University of Science and Technology Qingdao 266042 PR China. Electronic address: kuangshaoping@126.com.); Shao Hongbo (Salt-soil Agricultural Center Institute of Agricultural Resources and Enviro…	Kuang Shaoping (Qingdao University of Science and Technology); Shao Hongbo (Jiangsu Academy of Agricultural Sciences)	Wang Bingchen (Qingdao University of Science and Technology); Kuang Shaoping (Qingdao University of Science and Technology); Shao Hongbo (Jiangsu Academy of Agricultural Sciences); Cheng Fei (Weifang Municipal Public Utility Service Center Wei Fang 261061 PR China.); Wang Huihui (Qingdao University of Science and Technology)	9	9	1.35	2.24		https://app.dimensions.ai/details/publication/pub.1143835146	41 Environmental Sciences; 4104 Environmental Management	15 Life on Land
2186	pub.1144450478	10.21203/rs.3.rs-1215067/v1			DNA Metabarcoding Reveals Cryptic Geographically-influenced Microbial Diversity After Anthropogenic Impact in Original Forest Soils on the Isolated Trindade Island South Atlantic	Located 1 140 km from the South American coastline in the South Atlantic Ocean and with an age of 4 million years Trindade Island is the most recent volcanic component of Brazilian territory. Its vegetation was severely damaged by human influence in particular through the introduction of exotic grazing animals such as goats. However since the complete eradication of goats and other feral animals …			Research Square				2022-01-05	2022	2022-01-05					All OA; Green	Preprint	Camara Paulo Saraiva; Bones Fabio; Lopes Fabyano; Oliveira Fabio; Barreto Cristine; Campos Larissa; Carvalho-Silva Micheline; Convey Peter; Rosa Luiz; Henriques Diego	Camara Paulo Saraiva (Universidade de Brasilia Instituto de Ciencias Biologicas); Bones Fabio (); Lopes Fabyano (); Oliveira Fabio (); Barreto Cristine (); Campos Larissa (); Carvalho-Silva Micheline (); Convey Peter (); Rosa Luiz (); Henriques Diego ()		Camara Paulo Saraiva (University of Brasília); Bones Fabio (); Lopes Fabyano (); Oliveira Fabio (); Barreto Cristine (); Campos Larissa (); Carvalho-Silva Micheline (); Convey Peter (); Rosa Luiz (); Henriques Diego ()	0	0		0	https://www.researchsquare.com/article/rs-1215067/latest.pdf	https://app.dimensions.ai/details/publication/pub.1144450478	31 Biological Sciences; 3103 Ecology; 3107 Microbiology; 37 Earth Sciences
2170	pub.1128517006	10.3390/microorganisms8060900	32549367	PMC7355893	Molecular Characterization and Antimicrobial Susceptibilities of Nocardia Species Isolated from the Soil; A Comparison with Species Isolated from Humans	Nocardia species one of the most predominant Actinobacteria of the soil microbiota cause infection in humans following traumatic inoculation or inhalation. The identification typing phylogenetic relationship and antimicrobial susceptibilities of 38 soil Nocardia strains from Lara State Venezuela were studied by 16S rRNA and gyrB (subunit B of topoisomerase II) genes multilocus sequence analysis (…	The authors are grateful to M. Blanco (Universidad de Los Andes Mérida Venezuela) for assistance in strain isolation to J. A. Saéz-Nieto and A. Zaballos for help in the identification and sequencing to Adrian Burton for language and editing assistance and to the health laboratories that provided the clinical Nocardia strains examined.	This work was funded by a grant to N.G. from the Instituto de Salud Carlos III (MPY 1278/15). A part of this manuscript forms the M.S project undertaken at the Faculty of Science Universidad Autónoma de Madrid (Spain).	Microorganisms				2020-06-15	2020	2020-06-15		8	6	900	All OA; Gold	Article	Carrasco Gema; Monzón Sara; San Segundo María; García Enrique; Garrido Noelia; Medina-Pascual María J.; Villalón Pilar; Ramírez Ana; Jiménez Pilar; Cuesta Isabel; Valdezate Sylvia	Carrasco Gema (Reference and Research Laboratory for Taxonomy National Centre of Microbiology Instituto de Salud Carlos III Majadahonda 28220 Madrid Spain; gcarrasco@isciii.es (G.C.); sansegundojimenezmaria@gmail.com (M.S.S.); ivorycat3@hotmail.com (N.G.); mjmedina@isciii.es (M.J.M.-P.); pvillalon@isciii.es (P.V.)); Monzón Sara (Bionformatics Unit Applied Services Training and Research Instituto …	Valdezate Sylvia (Instituto de Salud Carlos III)	Carrasco Gema (Instituto de Salud Carlos III); Monzón Sara (Instituto de Salud Carlos III; Bionformatics Unit Applied Services Training and Research Instituto de Salud Carlos III Majadahonda 28220 Madrid Spain; smonzon@isciii.es (S.M.); isabel.cuesta@isciii.es (I.C.)); San Segundo María (Instituto de Salud Carlos III); García Enrique (University of the Andes; Soil Microbiology Laboratory Microbio…	7	3	0.38	1.25	https://www.mdpi.com/2076-2607/8/6/900/pdf?version=1592225305	https://app.dimensions.ai/details/publication/pub.1128517006	31 Biological Sciences; 3105 Genetics; 3107 Microbiology
1996	pub.1157401701	10.1111/aec.13332			Investigating aerial diversity of non‐fungal eukaryotes across a 40° latitudinal transect using DNA metabarcoding	Abstract The high number of bipolar and widespread bryophyte and microbial taxa in the Antarctic flora suggests the effective Long‐Distance Dispersal (LDD) of spores and other propagules from lower latitudes and even the Northern Hemisphere to Antarctica and the sub‐Antarctic regions. However few studies have attempted to document the transfer mechanisms by which potential newcomers may arrive in…	ACKNOWLEDGEMENTS We thank the staff and crew of the Brazilian Air Force and Brazilian Navy vessel Ary Rongel for excellent logistic support. Special thanks to Congresswoman Jô Moraes and to the Instituto de Ciências Biológicas da Universidade de Brasília for providing extra funds. CONFLICT OF INTEREST STATEMENT The authors declare that they have no conflict of interest.	This study received financial support from Brazilian Conselho Nacional de Desenvolvimento Científico e Tecnológico (CNPq) Ministério da Ciência Tecnologia e Inovação (MCTI) and Programa Antártico Brasileiro (PROANTAR). P. Convey is supported by Natural Environment Research Council (NERC) core funding to the British Antarctic Survey (BAS) ‘Biodiversity Evolution and Adaptation’ Team. Fabyano A. C.…	Austral Ecology				2023-04-20	2023	2023-04-20	2023-09	48	6	1178-1194	Closed	Article	Câmara Paulo Eduardo Aguiar Saraiva; Lopes Fabyano Alvares Cardoso; Bones Fábio Leal Viana; Rodrigues Luiz Antonio Costa; Carvalho‐Silva Micheline; Stech Michael; Convey Peter; Rosa Luiz Henrique	Câmara Paulo Eduardo Aguiar Saraiva (Departamento de Botânica Universidade de Brasília Brasília Brazil; Programa de Pós‐graduação em algas fungos e plantas Universidade Federal de Santa Catarina Florianópolis Brazil); Lopes Fabyano Alvares Cardoso (Laboratório de Microbiologia Universidade Federal do Tocantins Porto Nacional Tocantins Brazil); Bones Fábio Leal Viana (Programa de Pós‐graduação em …	Câmara Paulo Eduardo Aguiar Saraiva (University of Brasília; Universidade Federal de Santa Catarina)	Câmara Paulo Eduardo Aguiar Saraiva (University of Brasília; Universidade Federal de Santa Catarina); Lopes Fabyano Alvares Cardoso (Federal University of Tocantins); Bones Fábio Leal Viana (Universidade Federal de Santa Catarina); Rodrigues Luiz Antonio Costa (Faculdade Celso Lisboa Rio de Janeiro Brazil); Carvalho‐Silva Micheline (University of Brasília); Stech Michael (Naturalis Biodiversity C…	2	2				https://app.dimensions.ai/details/publication/pub.1157401701	31 Biological Sciences; 3103 Ecology; 3107 Microbiology
1951	pub.1140605809	10.3390/ijerph18168859	34444608	PMC8393949	Bibliometric Analysis of Current Status on Bioremediation of Petroleum Contaminated Soils during 2000–2019	Petroleum contaminated soils have become a great concern worldwide. Bioremediation has been widely recognized as one of the most promising technologies and has played an important role in solving the issues of petroleum contaminated soils. In this study a bibliometric analysis using VOSviewer based on Web of Science data was conducted to provide an overview on the field of bioremediation of petro…		This work was supported by the National Key R & D Program of China (2020YFD1100300).	International Journal of Environmental Research and Public Health			Bibliometrics; Biodegradation Environmental; Petroleum; Soil; Soil Microbiology; Soil Pollutants	2021-08-23	2021	2021-08-23		18	16	8859	All OA; Gold	Article	Song Yingjin; Li Ruiyi; Chen Guanyi; Yan Beibei; Zhong Lei; Wang Yuxin; Li Yihang; Li Jinlei; Zhang Yingxiu	Song Yingjin (School of Environmental Science and Engineering Tianjin University Tianjin 300072 China; yingjin@tju.edu.cn (Y.S.); lruiyi1998@163.com (R.L.); chen@tju.edu.cn (G.C.); yanbeibei@tju.edu.cn (B.Y.); lei.zhong@tju.edu.cn (L.Z.); wangyuxin2020@tju.edu.cn (Y.W.); liyihang_1996@tju.edu.cn (Y.L.); lijl@tju.edu.cn (J.L.)); Li Ruiyi (School of Environmental Science and Engineering Tianjin Uni…	Zhang Yingxiu (Tianjin University; School of Environmental Science and Engineering Tianjin University Tianjin 300072 China; yingjin@tju.edu.cn (Y.S.); lruiyi1998@163.com (R.L.); chen@tju.edu.cn (G.C.); yanbeibei@tju.edu.cn (B.Y.); lei.zhong@tju.edu.cn (L.Z.); wangyuxin2020@tju.edu.cn (Y.W.); liyihang_1996@tju.edu.cn (Y.L.); lijl@tju.edu.cn (J.L.); China-Australia Centre for Sustainable Urban Deve…	Song Yingjin (Tianjin University; School of Environmental Science and Engineering Tianjin University Tianjin 300072 China; yingjin@tju.edu.cn (Y.S.); lruiyi1998@163.com (R.L.); chen@tju.edu.cn (G.C.); yanbeibei@tju.edu.cn (B.Y.); lei.zhong@tju.edu.cn (L.Z.); wangyuxin2020@tju.edu.cn (Y.W.); liyihang_1996@tju.edu.cn (Y.L.); lijl@tju.edu.cn (J.L.)); Li Ruiyi (Tianjin University; School of Environme…	6	4	0.25	6.51	https://www.mdpi.com/1660-4601/18/16/8859/pdf?version=1629708327	https://app.dimensions.ai/details/publication/pub.1140605809	41 Environmental Sciences; 46 Information and Computing Sciences; 4610 Library and Information Studies
1867	pub.1146072302	10.1007/s11356-022-19299-4	35247173		Prospects in the bioremediation of petroleum hydrocarbon contaminants from hypersaline environments: A review	Hypersaline environments are underappreciated and are frequently exposed to pollution from petroleum hydrocarbons. Unlike other environs the high salinity conditions present are a deterrent to various remediation techniques. There is also production of hypersaline waters from oil-polluted ecosystems which contain toxic hydrophobic pollutants that are threat to public health environmental protecti…			Environmental Science and Pollution Research			Biodegradation Environmental; Hydrocarbons; Microbiota; Petroleum; Petroleum Pollution; Soil Microbiology; Soil Pollutants	2022-03-05	2022	2022-03-05	2022-05	29	24	35615-35642	Closed	Article	Jimoh Abdullahi Adekilekun; Ikhimiukor Odion Osebhahiemen; Adeleke Rasheed	Jimoh Abdullahi Adekilekun (Unit for Environmental Sciences and Management North-West University (Potchefstroom Campus) 2520 Potchefstroom South Africa; Institute for Microbial Biotechnology and Metagenomics Department of Biotechnology University of the Western Cape 7535 Bellville Cape Town South Africa); Ikhimiukor Odion Osebhahiemen (Environmental Microbiology and Biotechnology Laboratory Depar…	Jimoh Abdullahi Adekilekun (North-West University; University of the Western Cape)	Jimoh Abdullahi Adekilekun (North-West University; University of the Western Cape); Ikhimiukor Odion Osebhahiemen (University of Ibadan); Adeleke Rasheed (North-West University)	18	16	3.77	9.19		https://app.dimensions.ai/details/publication/pub.1146072302	41 Environmental Sciences; 4103 Environmental Biotechnology; 4105 Pollution and Contamination
1858	pub.1138081824	10.3390/ijerph18105215	34068925	PMC8157233	Advances and Applications of Water Phytoremediation: A Potential Biotechnological Approach for the Treatment of Heavy Metals from Contaminated Water	Potable and good-quality drinking water availability is a serious global concern since several pollution sources significantly contribute to low water quality. Amongst these pollution sources several are releasing an array of hazardous agents into various environmental and water matrices. Unfortunately there are not very many ecologically friendly systems available to treat the contaminated envir…	This research did not receive any specific grant from funding agencies in the public commercial or not-for-profit sectors. The authors acknowledge the page BioRender.com as the main program used to make the Figure 2 Figure 3 Figure 4 Figure 5 Figure 6 Figure 7 Figure 8 presented in this review. Corresponding author owns a License of Biorender.com for their publication.	This research received no external funding.	International Journal of Environmental Research and Public Health		Paul B. Tchounwou	Biodegradation Environmental; Humans; Metals Heavy; Soil; Soil Pollutants; Water	2021-05-14	2021	2021-05-14		18	10	5215	All OA; Gold	Article	Delgado-González Cristián Raziel; Madariaga-Navarrete Alfredo; Fernández-Cortés José Miguel; Islas-Pelcastre Margarita; Oza Goldie; Iqbal Hafiz M. N.; Sharma Ashutosh	Delgado-González Cristián Raziel (Área Académica de Ciencias Agrícolas y Forestales Instituto de Ciencias Agropecuarias Universidad Autónoma del Estado de Hidalgo Tulancingo 43600 Mexico; cristian_delgado@uaeh.edu.mx (C.R.D.-G.); alfredo_madariaga@uaeh.edu.mx (A.M.-N.); mislas@uaeh.edu.mx (M.I.-P.)); Madariaga-Navarrete Alfredo (Área Académica de Ciencias Agrícolas y Forestales Instituto de Cienc…	Iqbal Hafiz M. N. (Monterrey Institute of Technology and Higher Education); Sharma Ashutosh (Monterrey Institute of Technology and Higher Education)	Delgado-González Cristián Raziel (Universidad Autónoma del Estado de Hidalgo); Madariaga-Navarrete Alfredo (Universidad Autónoma del Estado de Hidalgo); Fernández-Cortés José Miguel (Monterrey Institute of Technology and Higher Education); Islas-Pelcastre Margarita (Universidad Autónoma del Estado de Hidalgo); Oza Goldie (Center of Research and Technologic Development in Electrochemistry); Iqbal …	28	20	1.86	6.16	https://www.mdpi.com/1660-4601/18/10/5215/pdf?version=1620979714	https://app.dimensions.ai/details/publication/pub.1138081824	41 Environmental Sciences; 4104 Environmental Management; 4105 Pollution and Contamination	6 Clean Water and Sanitation
1747	pub.1127257675	10.1007/978-981-15-1812-6_5			Advancement of Omics: Prospects for Bioremediation of Contaminated Soils	The soil is a complex mixture of organic matter and minerals supporting a discrete array of life. Severely polluted soils have been detoxified using a variety of microorganisms. Bioremediation is a process of removal of environmental contaminants utilizing microbes through a variety of enzymatic processes. In situ processing high public acceptance and a comparatively lower cost hasten the overall…				Microbial Bioremediation & Biodegradation	Maulin P. Shah		2020-05-01	2020	2020-05-01	2020			113-142	Closed	Chapter	Gupta Kriti; Biswas Rimi; Sarkar Angana	Gupta Kriti (Department of Biotechnology and Medical Engineering National Institute of Technology Rourkela Rourkela Odisha India); Biswas Rimi (Department of Biotechnology and Medical Engineering National Institute of Technology Rourkela Rourkela Odisha India); Sarkar Angana (Department of Biotechnology and Medical Engineering National Institute of Technology Rourkela Rourkela Odisha India)	Sarkar Angana (National Institute of Technology Rourkela)	Gupta Kriti (National Institute of Technology Rourkela); Biswas Rimi (National Institute of Technology Rourkela); Sarkar Angana (National Institute of Technology Rourkela)	23	9		3.44		https://app.dimensions.ai/details/publication/pub.1127257675	32 Biomedical and Clinical Sciences; 3205 Medical Biochemistry and Metabolomics; 41 Environmental Sciences
1674	pub.1104560031	10.1007/s10532-018-9837-x	29948519		Aerobic bacteria degrading both n-alkanes and aromatic hydrocarbons: an undervalued strategy for metabolic diversity and flexibility	Environmental pollution with petroleum toxic products has afflicted various ecosystems causing devastating damage to natural habitats with serious economic implications. Some crude oil components may serve as growth substrates for microorganisms. A number of bacterial strains reveal metabolic capacities to biotransform various organic compounds. Some of the hydrocarbon degraders are highly bioche…	We would like to thank Dr. Piotr Kapusta (Department of Microbiology Oil and Gas Institute-National Research Institute Poland) for his advice and help during the preparation of this manuscript. The work was financially supported by the research grant of the Polish National Science Centre No. UMO-2012/07/N/NZ9/00920.		Biodegradation			Alkanes; Bacteria Aerobic; Biodegradation Environmental; Biotransformation; Hydrocarbons Aromatic; Phylogeny	2018-06-13	2018	2018-06-13	2018-08	29	4	359-407	All OA; Hybrid	Article	Brzeszcz Joanna; Kaszycki Paweł	Brzeszcz Joanna (Department of Microbiology Oil and Gas Institute-National Research Institute ul. Lubicz 25A 31-503 Kraków Poland); Kaszycki Paweł (Unit of Biochemistry Institute of Plant Biology and Biotechnology Faculty of Biotechnology and Horticulture University of Agriculture in Kraków al. 29 Listopada 54 31-425 Kraków Poland)	Brzeszcz Joanna (Oil and Gas Institute - National Research Institute)	Brzeszcz Joanna (Oil and Gas Institute - National Research Institute); Kaszycki Paweł (University of Agriculture in Krakow)	150	55	6.1	14.14	https://link.springer.com/content/pdf/10.1007/s10532-018-9837-x.pdf	https://app.dimensions.ai/details/publication/pub.1104560031	40 Engineering; 4004 Chemical Engineering
1556	pub.1105979241	10.1007/978-3-319-90680-5_17			Applications of DNA Barcoding in Fisheries	Sustainable management of fish resources rely on accurate identification of species for proper stock assessment recruitment and delineation. Molecular markers would complement morphological tools and are able to delineate species more accurately. Mitochondrial cytochrome c oxidase subunit I has been standardized as a barcode gene for discriminating fishes. DNA barcoding approach can be applied in…				DNA Barcoding and Molecular Phylogeny	Subrata Trivedi Hasibur Rehman Shalini Saggu Chellasamy Panneerselvam Sankar K. Ghosh		2018-08-04	2018	2018-08-04	2018			281-292	Closed	Chapter	Pavan-Kumar A.; Jaiswar A. K.; Gireesh-Babu P.; Chaudhari A.; Krishna G.	Pavan-Kumar A. (ICAR-Central Institute of Fisheries Education); Jaiswar A. K. (ICAR-Central Institute of Fisheries Education); Gireesh-Babu P. (ICAR-Central Institute of Fisheries Education); Chaudhari A. (ICAR-Central Institute of Fisheries Education); Krishna G. (ICAR-Central Institute of Fisheries Education)		Pavan-Kumar A. (ICAR-Central Institute of Fisheries Education); Jaiswar A. K. (ICAR-Central Institute of Fisheries Education); Gireesh-Babu P. (ICAR-Central Institute of Fisheries Education); Chaudhari A. (ICAR-Central Institute of Fisheries Education); Krishna G. (ICAR-Central Institute of Fisheries Education)	2	0		0.32		https://app.dimensions.ai/details/publication/pub.1105979241	30 Agricultural Veterinary and Food Sciences; 3005 Fisheries Sciences; 31 Biological Sciences; 3105 Genetics; 41 Environmental Sciences; 4104 Environmental Management
1507	pub.1130311969	10.1007/978-3-030-50075-7_11			Applications of DNA Barcoding in Fisheries	Sustainable management of fish resources requires accurate identification of species for precise assessment of the stock size and recruitment. Molecular markers would complement morphological tools to differentiate species more accurately. Mitochondrial cytochrome c oxidase subunit I has been standardized as a barcode gene for discriminating fishes. DNA barcoding has been applied in fisheries to …				DNA Barcoding and Molecular Phylogeny	Subrata Trivedi Hasibur Rehman Shalini Saggu Chellasamy Panneerselvam Sankar K. Ghosh		2020-08-25	2020	2020-08-25	2020			177-189	Closed	Chapter	Pavan-Kumar A.; Jaiswar A. K.; Gireesh-Babu P.; Chaudhari A.; Krishna G.	Pavan-Kumar A. (ICAR-Central Institute of Fisheries Education Mumbai Maharashtra India); Jaiswar A. K. (ICAR-Central Institute of Fisheries Education Mumbai Maharashtra India); Gireesh-Babu P. (ICAR-Central Institute of Fisheries Education Mumbai Maharashtra India); Chaudhari A. (ICAR-Central Institute of Fisheries Education Mumbai Maharashtra India); Krishna G. (ICAR-Central Institute of Fisheri…	Pavan-Kumar A. (Central Institute of Fisheries Education)	Pavan-Kumar A. (Central Institute of Fisheries Education); Jaiswar A. K. (Central Institute of Fisheries Education); Gireesh-Babu P. (Central Institute of Fisheries Education); Chaudhari A. (Central Institute of Fisheries Education); Krishna G. (Central Institute of Fisheries Education)	2	1		0.38		https://app.dimensions.ai/details/publication/pub.1130311969	31 Biological Sciences; 3105 Genetics; 41 Environmental Sciences; 4104 Environmental Management
1357	pub.1107350493	10.7287/peerj.preprints.1254v2			Responses of microbial community from tropical pristine coastal soil to crude oil contamination	Brazilian offshore crude oil exploration has increased after the discovery of new reservoirs in the region known as pré-sal in a depth of 7.000 m under the water surface. Oceanic Islands near these areas represent sensitive environments where changes in microbial communities due to oil contamination could cause the loss of metabolic functions with catastrophic effects to the soil services provide…	National Counsel of Technological and Scientific Development (CNPq) grant 405544/2012-0 and Coordination for the Improvement of Higher Education Personnel (CAPES) financed this work. Rothamsted Research receives strategic funding from the Biotechnology and Biological Sciences Research Council (BBSRC) of the UK. The funders had no role in study design data collection and analysis decision to publi…		PeerJ Preprints				2016-01-06	2016	2016-01-06		4		e1254v2	All OA; Green	Preprint	Morais Daniel; Pylro Victor; Clark Ian M; Hirsch Penny R; Tótola Marcos	Morais Daniel (Department of Microbiology Universidade Federal de Viçosa Viçosa Minas Gerais Brazil); Pylro Victor (Genomics and Computational Biology Group René Rachou Research Center (CPqRR-FIOCRUZ) Belo Horizonte Minas Gerais Brazil); Clark Ian M (AgroEcology Department Rothamsted Research Harpenden Hertfordshire United Kingdom); Hirsch Penny R (AgroEcology Department Rothamsted Research Harpe…	Morais Daniel (Universidade Federal de Viçosa); Tótola Marcos (Universidade Federal de Viçosa)	Morais Daniel (Universidade Federal de Viçosa); Pylro Victor (Genomics and Computational Biology Group René Rachou Research Center (CPqRR-FIOCRUZ) Belo Horizonte Minas Gerais Brazil); Clark Ian M (Rothamsted Research); Hirsch Penny R (Rothamsted Research); Tótola Marcos (Universidade Federal de Viçosa)	0	0		0	https://locus.ufv.br//bitstream/123456789/12840/1/peerj-1733.pdf	https://app.dimensions.ai/details/publication/pub.1107350493	31 Biological Sciences; 3107 Microbiology; 41 Environmental Sciences; 4105 Pollution and Contamination	14 Life Below Water
1304	pub.1137568240	10.1016/j.scitotenv.2021.147395			Remediation of weathered diesel-oil contaminated soils using biopile systems: An amendment selection and pilot-scale study	Weathered diesel oil (WDO) has less biodegradable and volatile characteristics and its bioremediation could be a challenge. In this study the effectiveness of enhanced bioremediation via biopile processes for the cleanup of WDO-contaminated soils was evaluated. Six biopiles were constructed and operated with the following six different amendments addition: red bran (12 kg) water-soluble fertilize…	This study was funded by CPC Corporation Taiwan (CPC) (Grant No. FEA0915001). The authors would like to thank the personnel at CPC for their direction and help during the research period.		The Science of The Total Environment				2021-09	2021		2021-09	786		147395	Closed	Article	Liu Pu-Fong; Yang Zong-Han; Chen Ya-Lei; Lo Kai-Hong; Kao Chih-Ming	Liu Pu-Fong (Institute of Environmental Engineering National Sun Yat-Sen University Kaohsiung Taiwan.); Yang Zong-Han (Apollo Technology Co. Ltd. Kaohsiung Taiwan.); Chen Ya-Lei (Department of Biotechnology National Kaohsiung Normal University Kaohsiung Taiwan.); Lo Kai-Hong (Institute of Environmental Engineering National Sun Yat-Sen University Kaohsiung Taiwan.); Kao Chih-Ming (Institute of Env…	Kao Chih-Ming (National Sun Yat-sen University)	Liu Pu-Fong (National Sun Yat-sen University); Yang Zong-Han (Apollo Technology Co. Ltd. Kaohsiung Taiwan.); Chen Ya-Lei (National Kaohsiung Normal University); Lo Kai-Hong (National Sun Yat-sen University); Kao Chih-Ming (National Sun Yat-sen University)	8	5		2		https://app.dimensions.ai/details/publication/pub.1137568240	41 Environmental Sciences; 4103 Environmental Biotechnology; 4105 Pollution and Contamination
1281	pub.1171313202	10.1515/bot-2023-0066			Occurrence of Dictyosphaeria (Cladophorales Chlorophyta) species on the Brazilian coast and oceanic islands based on morphological and molecular data	Abstract Molecular data related to morphology from the multicellular vesiculated genus Dictyosphaeria are scarce. We provide the first molecular data on Dictyosphaeria species from the southwestern Atlantic Ocean sampled from the Brazilian northeastern coast and two oceanic islands (Trindade southeastern Brazil and Fernando de Noronha northeastern Brazil). The samples from Brazil were morphologic…	The authors thank M.J. Wynne for the English revision and comments and both reviewers for their contributions to the manuscript. The authors also thank F. Leliaert for providing pictures of type material.	Research funding: JOFB (305829-2019-0) thanks Conselho Nacional de Pesquisa e Tecnologia (CNPq) for a scholarship and financial support. MCSS thanks the São Paulo Research Foundation (FAPESP 2019/11558-9) for a scholarship. The authors thank PROTRINDADE (Programa de Pesquisas da Ilha da Trindade) SECIRM/Brazilian Navy for this Island logistical and sampling support in a research project coordinat…	Botanica Marina				2024-05-03	2024	2024-05-03	2024-06-01	67	3	287-296	Closed	Article	de Brito Jhullyrson Osman Ferreira; Silva Michelle Cristine Santos; Oliveira Mariana Cabral; Pellizzari Franciane; Cassano Valéria; Gama Watson Arantes	de Brito Jhullyrson Osman Ferreira (Departamento de Biologia Universidade Federal Rural de Pernambuco 52171-900 Recife Pernambuco Brazil); Silva Michelle Cristine Santos (Departamento de Botânica Instituto de Biociências Universidade de São Paulo 05508-090 São Paulo Brazil); Oliveira Mariana Cabral (Departamento de Botânica Instituto de Biociências Universidade de São Paulo 05508-090 São Paulo Br…	Silva Michelle Cristine Santos (Universidade de São Paulo)	de Brito Jhullyrson Osman Ferreira (Federal Rural University of Pernambuco); Silva Michelle Cristine Santos (Universidade de São Paulo); Oliveira Mariana Cabral (Universidade de São Paulo); Pellizzari Franciane (Departamento de Ciências Biológicas Universidade Estadual do Paraná – campus Paranaguá 05508-900 Paranaguá Paraná Brazil); Cassano Valéria (Universidade de São Paulo); Gama Watson Arantes…	0	0				https://app.dimensions.ai/details/publication/pub.1171313202	31 Biological Sciences; 3103 Ecology; 3104 Evolutionary Biology	14 Life Below Water
1239	pub.1034418748	10.2744/ccb-1152.1			Deeper Mitochondrial Sequencing Reveals Cryptic Diversity and Structure in Brazilian Green Turtle Rookeries	Genetic markers are often used to designate population units for management and conservation but widespread sharing of mitochondrial DNA control-region haplotypes defined from short (<500 base-pair bp) sequences often limits inferences of population connectivity in marine turtles. Haplotype CM-A8 defined from 490-bp sequences dominated the haplotype profiles of the 3 major green turtle (Chelonia …	This work was supported by NOAA-Fisheries and by the Daniel B. Warnell School of Forestry and Natural Resources at the University of Georgia. We thank the Brazilian Navy Command of the 1st Naval District and Zelia de Brito Silva general manager of the Atol das Rocas Biological Reserve for assistance at the study sites. We also thank Luciana Moreira for coordination of sample collection at Trindad…		Chelonian Conservation and Biology				2015-12-01	2015	2015-12-01	2015-12-01	14	2	167-172	Closed	Article	Shamblin Brian M.; Dutton Peter H.; Bjorndal Karen A.; Bolten Alan B.; Naro-Maciel Eugenia; Santos Armando Jos Barsante; Bellini Claudio; Baptistotte Cecilia; Marcovaldi Maria ngela; Nairn Campbell J.	Shamblin Brian M. (Daniel B. Warnell School of Forestry and Natural Resources University of Georgia Athens Georgia 30602 USA [ brian.shamblin@gmail.com ; nairn@uga.edu ]); Dutton Peter H. (Marine Mammal and Turtle Division Southwest Fisheries Science Center National Marine Fisheries Service National Oceanographic and Atmospheric Administration 8901 La Jolla Shores Drive La Jolla California 92037 …	Shamblin Brian M. (University of Georgia)	Shamblin Brian M. (University of Georgia); Dutton Peter H. (Southwest Fisheries Science Center); Bjorndal Karen A. (University of Florida); Bolten Alan B. (University of Florida); Naro-Maciel Eugenia (College of Staten Island); Santos Armando Jos Barsante (Funda o Pr Tamar Rua Rubens Guelli 134 Sala 307 CEP 41815-135 Salvador BA Brazil [ Armando@tamar.org.br ]); Bellini Claudio (Centro Nacional d…	26	6		2.81		https://app.dimensions.ai/details/publication/pub.1034418748	31 Biological Sciences; 3103 Ecology; 3105 Genetics
1111	pub.1086109031	10.1643/ci-16-505			The Diet and Gut Microbial Communities of Two Closely Related Combtooth Blennies Chasmodes saburrae and Scartella cristata	The digestive tracts of fishes contain a diverse set of gut associated microbiota known to contribute to many functions of the fishes' biology. Furthermore it has been suggested that divergence in diets between two species is also associated with shifts in gut associated microbiota. Herein we describe and compare the diet and gastrointestinal microbiota of two closely related combtooth blennies S…	This study was partially funded by the Dayton Research Fund Fellowship (Bell Museum of Natural History University of Minnesota) Department of Fisheries Wildlife and Conservation Biology (University of Minnesota). Sequence processing and analysis was performed using the resources of the Minnesota Supercomputing Institute. Research was conducted under animal care and use protocol 1005A82295 approve…		Ichthyology & Herpetology				2017-06-19	2017	2017-06-19	2017-07	105	2	249-256	Closed	Article	Hundt Peter J.; Hundt Matthew J.; Staley Christopher; Sadowsky Michael J.; Simons Andrew M.	Hundt Peter J. (); Hundt Matthew J. (); Staley Christopher (); Sadowsky Michael J. (); Simons Andrew M. ()		Hundt Peter J. (); Hundt Matthew J. (); Staley Christopher (); Sadowsky Michael J. (); Simons Andrew M. ()	5	0		0.62		https://app.dimensions.ai/details/publication/pub.1086109031	31 Biological Sciences; 3103 Ecology; 3107 Microbiology	14 Life Below Water
983	pub.1130310900	10.1007/978-3-030-50075-7			DNA Barcoding and Molecular Phylogeny	This book presents a comprehensive overview of DNA barcoding and molecular phylogeny along with a number of case studies. It discusses a number of areas where DNA barcoding can be applied such as clinical microbiology especially in relation to infection management; DNA database management; and plant -animal interactions and also presents valuable information on the DNA barcoding and molecular phy…					Subrata Trivedi Hasibur Rehman Shalini Saggu Chellasamy Panneerselvam Sankar K. Ghosh		2020	2020		2020				Closed	Edited Book					4	2		0.82		https://app.dimensions.ai/details/publication/pub.1130310900	31 Biological Sciences; 3105 Genetics
980	pub.1127187739	10.1201/b22151			Microbial Biodegradation of Xenobiotic Compounds						Young-Cheol Chang		2019-01-30	2019	2019-01-30					Closed	Edited Book					5	1				https://app.dimensions.ai/details/publication/pub.1127187739
965	pub.1137889966	10.1080/15320383.2021.1920573			Investigation of microbial community changes in petroleum polluted sediments during hydrocarbons degradation	Bioremediation is among the most basic and reliable way to eliminate pollutants by transforming the toxic petroleum components into less toxic metabolites. In order to compare the change of bacterial community during oil-biodegradation process two oil-polluted sediments sampled from Tunisia were analyzed using 16S rDNA clone libraries. During the experimental period measurements of microbial abun…			Soil and Sediment Contamination An International Journal				2021-05-10	2021	2021-05-10	2022-02-17	31	2	200-219	Closed	Article	Mahjoubi Mouna; Cappello Simone; Santisi Santina; Najjari Afef; Souissi Yasmine; Cherif Ameur	Mahjoubi Mouna (Univ. Manouba ISBST BVBGR-LR11ES31 Biotechpole Sidi Thabet Ariana Tunisia); Cappello Simone (Istituto per Le Risorse Biologiche E Le Biotecnologie Marine (IRBIM) - CNR of Messina Messina Italy); Santisi Santina (Istituto per Le Risorse Biologiche E Le Biotecnologie Marine (IRBIM) - CNR of Messina Messina Italy); Najjari Afef (Laboratory of Microorganisms and Active Biomolecules Fa…	Cherif Ameur (Manouba University)	Mahjoubi Mouna (Manouba University); Cappello Simone (Istituto per Le Risorse Biologiche E Le Biotecnologie Marine (IRBIM) - CNR of Messina Messina Italy); Santisi Santina (Istituto per Le Risorse Biologiche E Le Biotecnologie Marine (IRBIM) - CNR of Messina Messina Italy); Najjari Afef (Tunis El Manar University); Souissi Yasmine (Manouba University; German University of Technology); Cherif Ameu…	4	2		1		https://app.dimensions.ai/details/publication/pub.1137889966	41 Environmental Sciences; 4103 Environmental Biotechnology; 4105 Pollution and Contamination	14 Life Below Water
908	pub.1110480833	10.1007/978-3-030-02369-0_2			Transcriptomics as a First Choice Gate for Fungal Biodegradation Processes Description	Environmental impacts of xenobiotic compounds released to air water and soil have opened a way for bioremediation to emerge as a green technology that can be safely applied to reduce pollutant concentrations to a minimum in a relative short period of time. “Hard to break” molecules such as asphaltenes celluloses and dyes are better treated with mycoremediation techniques. Fungi are higher eukaryo…			Nanotechnology in the Life Sciences	Approaches in Bioremediation	Ram Prasad Elisabet Aranda		2018-12-09	2018	2018-12-09	2018			29-42	Closed	Chapter	Ledezma-Villanueva Alejandro; Adame-Rodríguez José Manuel; Aréchiga-Carvajal Elva T.	Ledezma-Villanueva Alejandro (Unidad de Manipulación Genética Laboratorio de Micología y Fitopatología Departamento de Microbiología Facultad de Ciencias Biológicas Universidad Autónoma de Nuevo León Cd. Universitaria San Nicolás de los Garza NL Mexico); Adame-Rodríguez José Manuel (Unidad de Manipulación Genética Laboratorio de Micología y Fitopatología Departamento de Microbiología Facultad de …	Aréchiga-Carvajal Elva T. (Universidad Autónoma de Nuevo León)	Ledezma-Villanueva Alejandro (Universidad Autónoma de Nuevo León); Adame-Rodríguez José Manuel (Universidad Autónoma de Nuevo León); Aréchiga-Carvajal Elva T. (Universidad Autónoma de Nuevo León)	1	0		0.11		https://app.dimensions.ai/details/publication/pub.1110480833	31 Biological Sciences; 3107 Microbiology; 41 Environmental Sciences
892	pub.1101211810	10.1163/15685403-00003774			Characterization of 17 novel microsatellite loci for the brown spiny lobster Panulirus echinatus Smith 1869 using MiSeq	Using high-throughput sequencing technology 17 polymorphic microsatellites with perfect tetra-nucleotide repeats were identified for the brown spiny lobster Panulirus echinatus Smith 1869. Two to ten alleles were detected per locus across 30 samples analysed from the Canary Archipelago. Observed and expected heterozygosities per locus ranged between 0.100 and 0.867 and 0.095 and 0.799 respectivel…	The authors declare that they have no conflict of interest. We would like to thank Steve Bogdanowicz for technical assistance during microsatellite isolation and the sequencing and genotyping facility at the Cornell Life Sciences Core Laboratory Center (CLC). Thank you to Raúl Cruz and Rodrigo Maggioni for PhD orientation. Melinda Modrell revised the English and Diushi Keri helped with the Excel …		Crustaceana				2018-01-01	2018	2018-02-23	2018-01-01	91	4	413-424	Closed	Article	Gaeta Juliana; Acevedo Iván; Machordom Annie	Gaeta Juliana (Laboratório de Biologia Molecular Instituto de Ciências do Mar (Labomar) Universidade Federal do Ceará Fortaleza Brazil); Acevedo Iván (Departamento de Biodiversidad y Biología Evolutiva Museo Nacional de Ciencias Naturales (MNCN-CSIC) Madrid Spain); Machordom Annie (Departamento de Biodiversidad y Biología Evolutiva Museo Nacional de Ciencias Naturales (MNCN-CSIC) Madrid Spain)		Gaeta Juliana (Universidade Federal do Ceará); Acevedo Iván (Museo Nacional de Ciencias Naturales); Machordom Annie (Museo Nacional de Ciencias Naturales)	4	0		0.62		https://app.dimensions.ai/details/publication/pub.1101211810	31 Biological Sciences; 3103 Ecology; 3105 Genetics	14 Life Below Water
876	pub.1047073694	10.1007/978-3-319-29315-8_12			South Atlantic Rhodolith Beds: Latitudinal Distribution Species Composition Structure and Ecosystem Functions Threats and Conservation Status	The largest continuous latitudinal distribution of rhodolith beds occur in the South Atlantic Ocean. Up to now rhodolith beds were referred exclusively to the western portion of the South Atlantic. Here we describe the recent advances in the South Atlantic taking into account latitudinal distribution species composition structure and ecosystem functions threats and conservation status. Rhodolith …			Coastal Research Library	Rhodolith/Maërl Beds: A Global Perspective	Rafael Riosmena-Rodríguez Wendy Nelson Julio Aguirre		2016-10-08	2016	2016-10-08	2017	15		299-317	Closed	Chapter	Amado-Filho Gilberto M.; Bahia Ricardo G.; Pereira-Filho Guilherme H.; Longo Leila L.	Amado-Filho Gilberto M. (Instituto de Pesquisas Jardim Botânico do Rio de Janeiro Rio de Janeiro Brazil); Bahia Ricardo G. (Instituto de Pesquisas Jardim Botânico do Rio de Janeiro Rio de Janeiro Brazil); Pereira-Filho Guilherme H. (Universidade Federal de São Paulo Santos Brazil); Longo Leila L. (Universidade Federal do Espírito Santo Vitória Brazil)	Amado-Filho Gilberto M. (Instituto de Pesquisas Jardim Botânico do Rio de Janeiro)	Amado-Filho Gilberto M. (Instituto de Pesquisas Jardim Botânico do Rio de Janeiro); Bahia Ricardo G. (Instituto de Pesquisas Jardim Botânico do Rio de Janeiro); Pereira-Filho Guilherme H. (Federal University of São Paulo); Longo Leila L. (Universidade Federal do Espírito Santo)	50	22		6.73		https://app.dimensions.ai/details/publication/pub.1047073694	31 Biological Sciences; 3103 Ecology; 41 Environmental Sciences; 4104 Environmental Management	14 Life Below Water
876	pub.1128573479	10.3390/app10124173			Biodegradation of Total Petroleum Hydrocarbons in Soil: Isolation and Characterization of Bacterial Strains from Oil Contaminated Soil	In this study we isolated seven strains (termed BY1–7) from polluted soil at an oil station and evaluated their abilities to degrade total petroleum hydrocarbons (TPHs). Following 16 rRNA sequence analysis the strains were identified as belonging to the genera Bacillus Acinetobacter Sphingobium Rhodococcus and Pseudomonas respectively. Growth characterization studies indicated that the optimal gr…	This work was technically supported by the Soil Collaborative Innovation Center in Shanghai University of Engineering Science.	This research was funded by the Open Project Program of State Key Laboratory of Petroleum Pollution Control [PPC2018017] CNPC Research Institute of Safety and Environmental Technology.	Applied Sciences				2020-06-17	2020	2020-06-17		10	12	4173	All OA; Gold	Article	Wang Runkai; Wu Baichun; Zheng Jin; Chen Hongkun; Rao Pinhua; Yan Lili; Chai Fei	Wang Runkai (State Key Laboratory of Petroleum Pollution Control Beijing 102206 China; wangrunkai@sues.edu.cn (R.W.); wu-baichun@cnpc.com.cn (B.W.); zhengjin2810@163.com (J.Z.); chenhongkun@cnpn.com.cn (H.C.); School of Chemistry and Chemical Engineering Shanghai University of Engineering Science Shanghai 201620 China; liliyan@sues.edu.cn (L.Y.); cfpbj0501@163.com (F.C.); Anji Goachieve Environme…	Rao Pinhua (China University of Petroleum Beijing; State Key Laboratory of Petroleum Pollution Control Beijing 102206 China; wangrunkai@sues.edu.cn (R.W.); wu-baichun@cnpc.com.cn (B.W.); zhengjin2810@163.com (J.Z.); chenhongkun@cnpn.com.cn (H.C.); Shanghai University of Engineering Sciences; School of Chemistry and Chemical Engineering Shanghai University of Engineering Science Shanghai 201620 Ch…	Wang Runkai (China University of Petroleum Beijing; State Key Laboratory of Petroleum Pollution Control Beijing 102206 China; wangrunkai@sues.edu.cn (R.W.); wu-baichun@cnpc.com.cn (B.W.); zhengjin2810@163.com (J.Z.); chenhongkun@cnpn.com.cn (H.C.); Shanghai University of Engineering Sciences; School of Chemistry and Chemical Engineering Shanghai University of Engineering Science Shanghai 201620 C…	12	7		2.03	https://www.mdpi.com/2076-3417/10/12/4173/pdf?version=1592900003	https://app.dimensions.ai/details/publication/pub.1128573479	41 Environmental Sciences; 4103 Environmental Biotechnology; 4105 Pollution and Contamination
868	pub.1173896276	10.5194/essd-2024-244			Standardized datasets of Brazilian reef diversity in space and time	The Brazilian marine biogeographical province (SW Atlantic) hosts coral and rocky reefs that cover ~27 degrees of latitude and are distributed along a relatively narrow continental shelf and four oceanic islands and archipelagos. The broad gradients in temperature productivity and salinity shape patterns of biodiversity and lead to distinct local communities within the province. Although existing…			EGUsphere				2024-07-17	2024	2024-07-17		2024		1933-01-01	All OA; Green	Preprint	Luza André; Cordeiro Cesar; Aued Anaide; Barneche Diego; Bleuel Jessica; Ferreira Carlos; Floeter Sergio; Francini-Filho Ronaldo; Joyeux Jean-Christophe; Longo Guilherme; Mendes Thiago; Pinheiro Hudson; Quimbayo Juan; Roos Natália; Segal Barbara; Bender Mariana	Luza André (Marine Macroecology and Conservation Lab. Departamento de Ecologia e Evolução Universidade Federal de Santa Maria Santa Maria Rio Grande do Sul Brazil); Cordeiro Cesar (Universidade Estadual do Norte Fluminense Darcy Ribeiro Campos dos Goytacazes Rio de Janeiro Brazil); Aued Anaide (Departamento de Ecologia e Zoologia Universidade Federal de Santa Catarina Florianópolis Santa Catarina…		Luza André (Universidade Federal de Santa Maria); Cordeiro Cesar (State University of Norte Fluminense); Aued Anaide (Universidade Federal de Santa Catarina); Barneche Diego (Australian Institute of Marine Science; University of Western Australia); Bleuel Jessica (Federal University of Rio Grande do Norte); Ferreira Carlos (Fluminense Federal University); Floeter Sergio (Universidade Federal de S…	0	0			https://doi.org/10.5194/essd-2024-244	https://app.dimensions.ai/details/publication/pub.1173896276	31 Biological Sciences; 3103 Ecology; 41 Environmental Sciences; 4104 Environmental Management	14 Life Below Water
847	pub.1145361246	10.1016/j.apsoil.2022.104387			Bioremediation of oil-contaminated soil: Exploring the potential of endogenous hydrocarbon degrader Enterobacter sp. SAVR S-1	Enterobacter is commonly found in oil-contaminated soil and plays a vital role in environmental bioremediation. This paper selected Enterobacter sp. SAVR S-1 as a representative to study the degradation potential at different concentrations of Total petroleum hydrocarbon (TPH) in soil during bioremediation. Genomic analysis indicated that genes involved in the metabolism of aromatic compounds (pa…	Declaration of competing interest We declare that we have no financial and personal relationships with other people or organizations that can inappropriately influence our work there is no professional or other personal interest of any nature or kind in any product service and/or company that could be construed as influencing the position presented in or the review of the manuscript entitled “Bio…		Applied Soil Ecology				2022-05	2022		2022-05	173		104387	Closed	Article	Sun Shuo; Su Yuhua; Chen Shuiquan; Cui Wu; Zhao Chaocheng; Liu Qiyou	Sun Shuo (State Key Laboratory of Petroleum Pollution Control Qingdao 266580 PR China; College of Chemical Engineering China University of Petroleum (East China) Qingdao 266580 PR China); Su Yuhua (State Key Laboratory of Petroleum Pollution Control Qingdao 266580 PR China; College of Chemical Engineering China University of Petroleum (East China) Qingdao 266580 PR China); Chen Shuiquan (College …	Liu Qiyou (State Key Laboratory of Petroleum Pollution Control Qingdao 266580 PR China; China University of Petroleum East China)	Sun Shuo (State Key Laboratory of Petroleum Pollution Control Qingdao 266580 PR China; China University of Petroleum East China); Su Yuhua (State Key Laboratory of Petroleum Pollution Control Qingdao 266580 PR China; China University of Petroleum East China); Chen Shuiquan (Shandong University of Science and Technology); Cui Wu (State Key Laboratory of Petroleum Pollution Control Qingdao 266580 P…	17	12		7.55		https://app.dimensions.ai/details/publication/pub.1145361246	31 Biological Sciences; 3107 Microbiology; 41 Environmental Sciences; 4103 Environmental Biotechnology; 4105 Pollution and Contamination
809	pub.1110480823	10.1007/978-3-030-02369-0			Approaches in Bioremediation The New Era of Environmental Microbiology and Nanobiotechnology	Bioremediation refers to the clean‐up of pollution in soil groundwater surface water and air using typically microbiological processes. It uses naturally occurring bacteria and fungi or plants to degrade transform or detoxify hazardous substances to human health or the environment. For bioremediation to be effective microorganisms must enzymatically attack the pollutants and convert them to harml…			Nanotechnology in the Life Sciences		Ram Prasad Elisabet Aranda		2018	2018		2018				All OA; Green	Edited Book					53	12		5.92	https://link.springer.com/content/pdf/bfm:978-3-030-02369-0/1?pdf=chapter%20toc	https://app.dimensions.ai/details/publication/pub.1110480823	31 Biological Sciences; 3107 Microbiology; 41 Environmental Sciences	14 Life Below Water
769	pub.1041991884	10.1590/1676-0611-bn-2016-0164			The composition and new records of micro- and mesophytoplankton near the Vitória-Trindade Seamount Chain	In spite of the length of the Brazilian coastline studies of marine phytoplankton species in offshore areas have been largely neglected. Regarding phytoplankton species composition the aim was to assess biodiversity status species frequency and the similarities at different sites along the Vitoria-Trindade Seamount Chain. Phytoplankton net samples were analyzed. One hundred and seventy five infra…	We wish to thank FAPES (Fundação de Amparo à Pesquisa do Espírito Santo) for the scholarship ceded to Karoline Magalhães Ferreira Lubiana (44576170/2009) and also Caio C. M. Freire for helping with statistical analysis.		Biota Neotropica				2016-08-25	2016	2016-08-25	2016	16	3	e20160164	All OA; Gold	Article	Lubiana Karoline Magalhães Ferreira; Dias Camilo	Lubiana Karoline Magalhães Ferreira (Universidade Federal do Espirito Santo Departamento de Oceanografia e Ecologia Vitoria ES Brazil Universidade Federal do Espirito Santo Departamento de Oceanografia e Ecologia Vitoria ES Brazil Universidade Federal do Espírito Santo; Universidade de São Paulo Instituto de Biociências Departamento de Botânica São Paulo SP Brazil Universidade de São Paulo Instit…	Lubiana Karoline Magalhães Ferreira (Universidade Federal do Espírito Santo; Universidade de São Paulo)	Lubiana Karoline Magalhães Ferreira (Universidade Federal do Espírito Santo; Universidade de São Paulo); Dias Camilo (Universidade Federal do Espírito Santo)	2	0		0.27	http://www.scielo.br/pdf/bn/v16n3/1676-0611-bn-1676-0611-BN-2016-0164.pdf	https://app.dimensions.ai/details/publication/pub.1041991884	31 Biological Sciences; 3103 Ecology; 37 Earth Sciences
769	pub.1107395819	10.11606/t.41.2017.tde-12122016-122033			Diversidade das algas calcárias crostosas do Brasil baseada em marcadores moleculares e morfologia	As algas calcárias crostosas ou CCA (do inglês Crustose Coralline Algae) têm como principal característica a impregnação de carbonato de cálcio em suas paredes celulares. Este grupo é formado atualmente...							2017-01-01	2017	2017-01-01					All OA; Gold	Article	Vieira-Pinto Talita	Vieira-Pinto Talita ()		Vieira-Pinto Talita ()	0	0			http://www.teses.usp.br/teses/disponiveis/41/41132/tde-12122016-122033/publico/TalitaVieiraPinto_completacorrigida.pdf	https://app.dimensions.ai/details/publication/pub.1107395819
758	pub.1028175556	10.1670/12-031			Genetic Diversity and Natal Origins of Green Turtles (Chelonia mydas) in the Western Gulf of Mexico	Chelonia mydas (Green Turtle) foraging areas where juveniles subadults and adults of diverse natal origins coalesce and spend a large portion of their lives can be located thousands of kilometers from nesting beaches. Unfortunately the natal origin of turtles in many foraging areas remains unknown. Resolution of this issue was recently listed among the conservation priorities for the species by a…	Coauthor DS holds federal (U.S. permit TE840727-3) and state (Texas permit SPR-0190-122) authority to collect scientific samples of endangered Green Turtles. This work was supported under that authority and was funded jointly by the Texas Parks and Wildlife Department and National Park Service. The authors wish to thank the Sea Turtle Stranding and Salvage Network participants that located docume…		Journal of Herpetology				2013-06	2013		2013-06	47	2	251-257	Closed	Article	Anderson Joel D.; Shaver Donna J.; Karel William J.	Anderson Joel D. (Perry R. Bass Marine Fisheries Research Station Texas Parks and Wildlife Palacios Texas 77465 USA); Shaver Donna J. (National Park Service Padre Island National Seashore Corpus Christi Texas 78418 USA); Karel William J. (Perry R. Bass Marine Fisheries Research Station Texas Parks and Wildlife Palacios Texas 77465 USA)	Anderson Joel D. (Perry R. Bass Marine Fisheries Research Station Texas Parks and Wildlife Palacios Texas 77465 USA)	Anderson Joel D. (Perry R. Bass Marine Fisheries Research Station Texas Parks and Wildlife Palacios Texas 77465 USA); Shaver Donna J. (National Park Service); Karel William J. (Perry R. Bass Marine Fisheries Research Station Texas Parks and Wildlife Palacios Texas 77465 USA)	17	3		1.65		https://app.dimensions.ai/details/publication/pub.1028175556	31 Biological Sciences; 3103 Ecology; 3105 Genetics	15 Life on Land
733	pub.1115214678	10.1007/978-3-319-92735-0_10			Brazil	Indirect evidence for the occurrence of mesophotic coral ecosystems (MCEs) in Brazil dates back to the 1960s. Only in the last 10 years have Brazilian MCEs been studied systematically through the use of new tools such as trimix technical diving (open and closed circuit) remotely operated vehicles (ROVs) drop cameras submersibles and sidescan sonar. Brazilian MCEs occur along an extensive latitudi…	The authors acknowledge the Brazilian National Council for Scientific and Technological Development (CNPq) for continued funding.		Coral Reefs of the World	Mesophotic Coral Ecosystems	Yossi Loya Kimberly A. Puglise Tom C.L. Bridge		2019-05-23	2019	2019-05-23	2019	12		163-198	Closed	Chapter	Francini-Filho Ronaldo Bastos; Velásquez Viviana Márquez; da Silva Marianna Barbosa; Rosa Marcos Rogerio; Sumida Paulo Yukio Gomes; Pinheiro Hudson Tercio; Rocha Luiz Alves; Ferreira Carlos Eduardo Leite; Francini Carlo Leopoldo Bezerra; de Souza Rosa Ricardo	Francini-Filho Ronaldo Bastos (Departamento de Engenharia e Meio Ambiente Universidade Federal da Paraíba Rio Tinto PB Brazil); Velásquez Viviana Márquez (Programa de Pós-Graduação em Ciências Biológicas (Zoologia) Universidade Federal da Paraíba João Pessoa PB Brazil); da Silva Marianna Barbosa (Programa de Pós-Graduação em Ciências Biológicas (Zoologia) Universidade Federal da Paraíba João Pess…	Francini-Filho Ronaldo Bastos (Federal University of Paraíba)	Francini-Filho Ronaldo Bastos (Federal University of Paraíba); Velásquez Viviana Márquez (Federal University of Paraíba); da Silva Marianna Barbosa (Federal University of Paraíba); Rosa Marcos Rogerio (Universidade de São Paulo); Sumida Paulo Yukio Gomes (Universidade de São Paulo); Pinheiro Hudson Tercio (California Academy of Sciences); Rocha Luiz Alves (California Academy of Sciences); Ferreir…	12	1		1.79		https://app.dimensions.ai/details/publication/pub.1115214678	31 Biological Sciences; 3103 Ecology; 41 Environmental Sciences; 4102 Ecological Applications; 4104 Environmental Management	14 Life Below Water
696	pub.1136975795	10.5772/intechopen.92398			Cyanobacteria	Cyanobacteria are oxygenic organisms that play crucial roles in the cycles of carbon nitrogen and oxygen. They are ideal model organisms for studying photosynthesis nitrogen fixation and other biological processes. In addition cyanobacteria are well recognized for their potential for a variety of biotechnological applications. This book presents a comprehensive overview of this interesting and us…					Wael N. Hozzein		2022-01-12	2022						Closed	Edited Book					2	1		0.94		https://app.dimensions.ai/details/publication/pub.1136975795	31 Biological Sciences; 3103 Ecology; 3106 Industrial Biotechnology
673	pub.1163649292	10.1007/978-3-031-34854-9_18			Environmental and Invertebrate-Derived DNA: A Powerful Approach for Surveying and Monitoring Biodiversity	To know the organisms that surround us has always seemed a fascinating idea and a necessity to characterize an area and estimate its natural values. However performing complete surveys of the organisms is not always an easy task because some of them inhabit difficult-to-access areas and some are rare or difficult to be visualized. The analysis of the DNA retrieved from environmental samples (for …				Conservation Genetics in the Neotropics	Pedro M. Galetti		2023-08-30	2023	2023-08-30	2023			453-472	Closed	Chapter	Rodríguez-Castro Karen Giselle; Saranholi Bruno H.; de Oliveira Marina E.; Sales Naiara Guimarães	Rodríguez-Castro Karen Giselle (Facultad de Ciencias Básicas e Ingeniería Universidad de los Llanos Villavicencio Colombia; Departamento de Genética e Evolução Universidade Federal de São Carlos São Carlos SP Brazil); Saranholi Bruno H. (Departamento de Genética e Evolução Universidade Federal de São Carlos São Carlos SP Brazil); de Oliveira Marina E. (Departamento de Genética e Evolução Universi…	Rodríguez-Castro Karen Giselle (University of the Llanos; Federal University of São Carlos)	Rodríguez-Castro Karen Giselle (University of the Llanos; Federal University of São Carlos); Saranholi Bruno H. (Federal University of São Carlos); de Oliveira Marina E. (Federal University of São Carlos); Sales Naiara Guimarães (University of Salford)	1	1				https://app.dimensions.ai/details/publication/pub.1163649292	31 Biological Sciences; 3103 Ecology; 41 Environmental Sciences; 4101 Climate Change Impacts and Adaptation	15 Life on Land
660	pub.1047912769	10.1016/j.fishres.2014.10.006			Genetic diversity population genetic structure and demographic history of Auxis thazard (Perciformes) Selar crumenophthalmus (Perciformes) Rastrelliger kanagurta (Perciformes) and Sardinella lemuru (Clupeiformes) in Sulu-Celebes Sea inferred by mitochondrial DNA sequences	Aside from having an important ecological role in the ocean food web small pelagic fishes have become the major food source in the Sulu-Celebes Sea (SCS) which is bordered by Indonesia Malaysia and the Philippines. Conservation and management of these fishes are of prime importance because the people living around the SCS are highly dependent on these resources. Nevertheless basic biological info…	AcknowledgmentsThis study could not be carried out without the help of the following people during sample collection: Dr. Suwarso (Research Institute of Marine Fisheries of Indonesia); Mr. Irman Isnain and Mr. Afendi (Department of Fisheries Fisheries Research Center of Kota Kinabalu Malaysia); Aron Alcantara and Lilibeth Abina for the Tawi-Tawi samples; and people from the regional offices of th…		Fisheries Research				2015-02	2015		2015-02	162		64-74	Closed	Article	Pedrosa-Gerasmio Ivane R.; Agmata Altair B.; Santos Mudjekeewis D.	Pedrosa-Gerasmio Ivane R. (Genetic Fingerprinting Laboratory National Fisheries Research and Development Institute 101 Mother Ignacia Ave. Quezon City 1103 Philippines); Agmata Altair B. (Genetic Fingerprinting Laboratory National Fisheries Research and Development Institute 101 Mother Ignacia Ave. Quezon City 1103 Philippines); Santos Mudjekeewis D. (Genetic Fingerprinting Laboratory National Fi…	Pedrosa-Gerasmio Ivane R. (National Fisheries Research and Development Institute)	Pedrosa-Gerasmio Ivane R. (National Fisheries Research and Development Institute); Agmata Altair B. (National Fisheries Research and Development Institute); Santos Mudjekeewis D. (National Fisheries Research and Development Institute)	23	4		2.3		https://app.dimensions.ai/details/publication/pub.1047912769	31 Biological Sciences; 3105 Genetics	14 Life Below Water
641	pub.1150428954	10.1007/s10592-022-01466-2			Cores edges and beyond: insights into the phylogeography of frigatebirds with a focus on ultraperipheral and endemic populations	In the present context of the ramping up of the global biodiversity crisis improving our understanding on the genetic and biogeographic patterns of ill-known taxa is central to conservation planning. This is especially relevant for geographically isolated populations that suffer from little or no gene flow and an increased extinction risk. The few studies available on the molecular phylogeny and …	We would also like to thank the editor and two anonymous reviewers for their time and contributions to the manuscript. We are grateful to the following museums and collection managers for providing samples: In Brazil—Museum of Zoology University of São Paulo and Luís Fábio Silveira (Curator) and Mari Sakai; In Australia—Western Australian Museum (Australia) and Ron Johnstone (Curator) Rebecca Bra…	This work was co-funded by the project NORTE-01-0246-FEDER-000063 supported by Norte Portugal Regional Operational Programme (NORTE2020) under the PORTUGAL 2020 Partnership Agreement through the European Regional Development Fund (ERDF). FMSM RG and LP were supported by the Portuguese Foundation for Science and Technology (FCT) SFRH/BD/104703/2014 DL57/2016/CP1440/CT (SFRH/BPD/88496/2012) and DL5…	Conservation Genetics				2022-08-23	2022	2022-08-23	2022-12	23	6	1011-1025	Closed	Article	Martins Filipa M. S.; Godinho Raquel; Palma Luís	Martins Filipa M. S. (CIBIO Centro de Investigação em Biodiversidade e Recursos Genéticos InBIO Laboratório Associado Universidade do Porto Campus de Vairão 4485-661 Vairão Portugal; BIOPOLIS Program in Genomics Biodiversity and Land Planning CIBIO Campus de Vairão 4485-661 Vairão Portugal); Godinho Raquel (CIBIO Centro de Investigação em Biodiversidade e Recursos Genéticos InBIO Laboratório Asso…	Martins Filipa M. S. (University of Porto; University of Porto); Godinho Raquel (University of Porto; University of Porto; University of Porto; University of Johannesburg)	Martins Filipa M. S. (University of Porto; University of Porto); Godinho Raquel (University of Porto; University of Porto; University of Porto; University of Johannesburg); Palma Luís (University of Porto; University of Porto; University of Lisbon)	1	1		0.56		https://app.dimensions.ai/details/publication/pub.1150428954	31 Biological Sciences; 3103 Ecology; 3104 Evolutionary Biology; 3105 Genetics	15 Life on Land
637	pub.1103521698	10.11606/t.38.2017.tde-08022017-214445			A PHYLOGENETIC ANALYSIS OF FASCIOLARIIDAE (GASTROPODA: BUCCINOIDEA)	The neogastropod family Fasciolariidae comprise of important representatives of tropical and subtropical molluscan assemblages with over 500 species in the subfamilies Fasciolariinae Fusininae and Peristerniinae....							2017-01	2017						All OA; Gold	Article	do Couto Diogo Ribeiro	do Couto Diogo Ribeiro ()		do Couto Diogo Ribeiro ()	0	0		0	http://www.teses.usp.br/teses/disponiveis/38/38131/tde-08022017-214445/publico/CoutoDR.pdf	https://app.dimensions.ai/details/publication/pub.1103521698	31 Biological Sciences; 3103 Ecology; 37 Earth Sciences
617	pub.1038545992	10.1111/mms.12378			Genetic differentiation between humpback whales (Megaptera novaeangliae) from Atlantic and Pacific breeding grounds of South America	Abstract Humpback whales wintering in tropical waters along the Atlantic and Pacific coasts of the South American continent are thought to represent distinct populations or “stocks.” Here we present the first analysis of genetic differentiation and estimates of gene flow between these breeding stocks based on both mitochondrial DNA (mt DNA ) control region sequences (465 bp) and 16 microsatellite…	Acknowledgments This work was supported by Coordenação de Aperfeiçoamento de Pessoal de Nível Superior (CAPES) to ALC‐S; Conselho Nacional de Desenvolvimento Científico e Tecnológico (CNPq) to SLB; Fundação de Amparo à Pesquisa do Estado do Rio Grande do Sul (FAPERGS) to SLB; Instituto Chico Mendes de Conservação da Biodiversidade/Ministério do Meio Ambiente (ICMBIO/MMA); and Petróleo Brasileiro …		Marine Mammal Science				2016-11-18	2016	2016-11-18	2017-04	33	2	457-479	Closed	Article	Cypriano‐Souza Ana Lúcia; Engel Márcia H.; Caballero Susana; Olavarría Carlos; Flórez‐González Lilián; Capella Juan; Steel Debbie; Sremba Angie; Aguayo Anelio; Thiele Deborah; Baker C. Scott; Bonatto Sandro L.	Cypriano‐Souza Ana Lúcia (Faculdade de Biociências Pontifícia Universidade Católica do Rio Grande do Sul Avenida Ipiranga 6681 90619‐900 Porto Alegre Rio Grande do Sul Brazil; Projeto Baleia Jubarte/Instituto Baleia Jubarte Rua Barão do Rio Branco 125 45900‐000 Caravelas Bahia Brazil); Engel Márcia H. (Projeto Baleia Jubarte/Instituto Baleia Jubarte Rua Barão do Rio Branco 125 45900‐000 Caravelas…	Cypriano‐Souza Ana Lúcia (Pontifical Catholic University of Rio Grande do Sul; Projeto Baleia Jubarte/Instituto Baleia Jubarte Rua Barão do Rio Branco 125 45900‐000 Caravelas Bahia Brazil)	Cypriano‐Souza Ana Lúcia (Pontifical Catholic University of Rio Grande do Sul; Projeto Baleia Jubarte/Instituto Baleia Jubarte Rua Barão do Rio Branco 125 45900‐000 Caravelas Bahia Brazil); Engel Márcia H. (Projeto Baleia Jubarte/Instituto Baleia Jubarte Rua Barão do Rio Branco 125 45900‐000 Caravelas Bahia Brazil); Caballero Susana (Universidad de Los Andes); Olavarría Carlos (University of Auck…	15	4		1.84		https://app.dimensions.ai/details/publication/pub.1038545992	31 Biological Sciences; 3103 Ecology; 3105 Genetics
583	pub.1127317378	10.1007/978-981-15-1812-6			Microbial Bioremediation & Biodegradation	Microbial or biological degradation has long been the subject of active concern and the rapid expansion and growing sophistication of various industries in the last century has significantly increased the volume and complexity of toxic residues of wastes. These can be remediated by plants and microbes either natural origin or adapted for a specific purpose in a process known as bioremediation. Th…					Maulin P. Shah		2020	2020		2020				Closed	Edited Book					191	177		32.3		https://app.dimensions.ai/details/publication/pub.1127317378	41 Environmental Sciences; 4103 Environmental Biotechnology; 4105 Pollution and Contamination
569	pub.1100893318	10.5772/intechopen.72207			Microbial Bioremediation of Petroleum Hydrocarbon– Contaminated Marine Environments	Microbial Bioremediation of Petroleum Hydrocarbon– Contaminated Marine Environments | InTechOpen Published on: 2018-02-07. Authors: Mouna Mahjoubi Simone Cappello Yasmine Souissi et				Recent Insights in Petroleum Science and Engineering	Mansoor Zoveidavianpoor		2018-02-07	2018	2018-02-07					All OA; Hybrid	Chapter	Mahjoubi Mouna; Cappello Simone; Souissi Yasmine; Jaouani Atef; Cherif Atef Jaouani and Ameur	Mahjoubi Mouna (); Cappello Simone (); Souissi Yasmine (); Jaouani Atef (); Cherif Atef Jaouani and Ameur ()		Mahjoubi Mouna (); Cappello Simone (); Souissi Yasmine (); Jaouani Atef (); Cherif Atef Jaouani and Ameur ()	73	23		9.35	https://www.intechopen.com/citation-pdf-url/58250	https://app.dimensions.ai/details/publication/pub.1100893318	31 Biological Sciences; 3107 Microbiology; 41 Environmental Sciences; 4103 Environmental Biotechnology; 4105 Pollution and Contamination	14 Life Below Water
561	pub.1135374803	10.1007/s13364-021-00555-w			Integrating morphology and DNA barcoding to assess cetacean diversity in Brazil	Stranded cetaceans (whales dolphins and porpoises) are frequently used to obtain data on species occurrence and demographic trends. Accurate species-level identification of these individuals is crucial but often challenging or impossible when relying solely on morphological features (e.g. for highly decayed specimens). To aid in the development of a reliable molecular assay for cetacean DNA-based…	The authors would like to thank all members of 16 institutions involved in field work and sampling activity: Grupo de Estudos de Mamíferos Aquáticos do Rio Grande do Sul (GEMARS) Ecossistemas Aquáticos (Aquasis) Laboratório de Biologia Molecular da Universidade do Vale dos Sinos Fundação Osvaldo Cruz (FIOCRUZ) Universidade Federal do Espírito Santo (UFES) Universidade de São Paulo (USP) Universid…	Coordenação e Aperfeiçoamento de Pessoal de Nível Superior (CAPES-PROSUC) (CAPES) (Finance Code 001) for the provision of the master’s degree to VSS and Conselho National de Pesquisa e Desenvolvimento Científico e Tecnológico (CNPq) which provided research fellowship to LRO (CNPq 303813/2011-3 308650/2014-0 and 310621/2017-8) ERS (PQ 310597/2018–8) SS (CNPq 306076/2019-5) and EE (PQ 305040/2008-1…	Mammal Research				2021-02-15	2021	2021-02-15	2021-04	66	2	349-369	All OA; Green	Article	Silva Vanessa S.; Skueresky Natália; Lopes Fernando; Koch Tabata K.; Ott Paulo Henrique; Siciliano Salvatore; Barreto André S.; Secchi Eduardo R.; de Meirelles Ana Carolina O.; Carvalho Vitor Luz; Borges João C. G.; Danilewicz Daniel; Farro Ana Paula C.; Barbosa Lupércio A.; Martins S. José; Domit Camila; Serrano Inês; Silva Tiago; Trinca Cristine; Marmontel Miriam; Emin-Lima Neusa Renata; Valiat…	Silva Vanessa S. (Universidade do Vale do Rio dos Sinos (UNISINOS) São Leopoldo RS Brazil); Skueresky Natália (Universidade do Vale do Rio dos Sinos (UNISINOS) São Leopoldo RS Brazil); Lopes Fernando (Universidade do Vale do Rio dos Sinos (UNISINOS) São Leopoldo RS Brazil); Koch Tabata K. (Universidade do Vale do Rio dos Sinos (UNISINOS) São Leopoldo RS Brazil); Ott Paulo Henrique (Universidade E…	de Oliveira Larissa Rosa (Universidade do Vale do Rio dos Sinos; Grupo de Estudos de Mamíferos Aquáticos do Rio Grande do Sul (GEMARS) Tôrres RS Brazil)	Silva Vanessa S. (Universidade do Vale do Rio dos Sinos); Skueresky Natália (Universidade do Vale do Rio dos Sinos); Lopes Fernando (Universidade do Vale do Rio dos Sinos); Koch Tabata K. (Universidade do Vale do Rio dos Sinos); Ott Paulo Henrique (Universidade Estadual do Rio Grande do Sul; Grupo de Estudos de Mamíferos Aquáticos do Rio Grande do Sul (GEMARS) Tôrres RS Brazil); Siciliano Salvato…	7	4		2.28	https://repositorio.pucrs.br/dspace/bitstream/10923/18443/2/Integrating_morphology_and_DNA_barcoding_to_assess_cetacean_diversity_in_Brazil.pdf	https://app.dimensions.ai/details/publication/pub.1135374803	31 Biological Sciences; 3103 Ecology	14 Life Below Water
560	pub.1146626520	10.1016/j.seta.2022.102183			Exploring the effectiveness of microbial fuel cell for the degradation of organic pollutants coupled with bio-energy generation	The ongoing global industrialization has contributed in a significant increase in the release of toxic pollutants into the environment the majority of which are primarily organic pollutions. When organic pollutants more than permissible limits are in the environment they pose a serious threat to aquatic life and humans. Various bioremediation and degradation techniques for organic pollutants remo…	The authors would like to express their appreciation to the School of Chemical Sciences USM. This research was also partially supported by the National Research Foundation of Korea (NRF) grant funded by the Korea government (MSIT) (No. 2021R1A2B5B01002656).		Sustainable Energy Technologies and Assessments				2022-08	2022		2022-08	52		102183	Closed	Article	Idris Mustapha Omenesa; Kim Hyun-Chul; Yaqoob Asim Ali; Ibrahim Mohamad Nasir Mohamad	Idris Mustapha Omenesa (School of Chemical Sciences Universiti Sains Malaysia 11800 Penang Malaysia; Department of Pure and Industrial Chemistry Kogi State University P.M.B 1008 Anyigba Kogi State Nigeria); Kim Hyun-Chul (Research Institute for Advanced Industrial Technology College of Science and Technology Korea University Sejong 30019 Republic of Korea); Yaqoob Asim Ali (School of Chemical Sci…	Yaqoob Asim Ali (Universiti Sains Malaysia; Korea University); Ibrahim Mohamad Nasir Mohamad (Universiti Sains Malaysia)	Idris Mustapha Omenesa (Universiti Sains Malaysia; Kogi State University); Kim Hyun-Chul (Korea University); Yaqoob Asim Ali (Universiti Sains Malaysia; Korea University); Ibrahim Mohamad Nasir Mohamad (Universiti Sains Malaysia)	53	44		21.31		https://app.dimensions.ai/details/publication/pub.1146626520	33 Built Environment and Design; 3302 Building; 40 Engineering; 4004 Chemical Engineering; 4008 Electrical Engineering	7 Affordable and Clean Energy
542	pub.1145699702	10.1016/b978-0-323-85839-7.00013-x			Chapter 5 Current advances in microbial bioremediation of surface and ground water contaminated by hydrocarbon	Surface water is easily contaminated by hydrocarbon spillage while several studies have linked infiltration to ground water contamination with diverse implications. Microbial bioremediation of hydrocarbon contaminated water using bacteria or fungi present a safer economical and more ecofriendly approach which is enhanced by enriching the contaminated water via bioaugmentation or biostimulation. I…				Development in Wastewater Treatment Research and Processes			2022	2022		2022			89-116	Closed	Chapter	Alao Micheal Bukola; Adebayo Elijah Adegoke	Alao Micheal Bukola (Department of Pure and Applied Biology Microbiology Unit Ladoke Akintola University of Technology Ogbomoso Oyo Nigeria); Adebayo Elijah Adegoke (Department of Pure and Applied Biology Microbiology Unit Ladoke Akintola University of Technology Ogbomoso Oyo Nigeria)		Alao Micheal Bukola (Ladoke Akintola University of Technology); Adebayo Elijah Adegoke (Ladoke Akintola University of Technology)	5	4		2.63		https://app.dimensions.ai/details/publication/pub.1145699702	31 Biological Sciences; 3107 Microbiology; 41 Environmental Sciences; 4103 Environmental Biotechnology
512	pub.1174191573	10.1016/b978-0-443-22072-2.00011-5			Chapter 17 Role of algae and its enzymes in the bioremediation of pollutants	Phycoremediation is a technology for decontaminating polluted sites using bioremediation. This technology is considered effective in clearing the pollutants from the ecosystem because of its sustainable and eco-friendly approach. Bioremediation of pollutants using biological organisms such as algae and its enzyme ensures a lower environmental impact than physical and mechanical methods. But many …				Enzyme Biotechnology for Environmental Sustainability			2024	2024		2024			439-463	Closed	Chapter	Abhirami S.; Kumaran Anushree; Sahadevan Smitha; Manjunatha Kavitha Guladahalli; Akshay Sadanand Dangari; Aithal Prarthana; Rao Rhagavendra; Vittal Rajeshwari; Akhila D.S.	Abhirami S. (Centre for Biotechnology and Biochemical Engineering Amity Institute of Biotechnology Amity University Noida Uttar Pradesh India Nitte (Deemed to be University) Nitte University Centre for Science Education and Research Deralakatte Mangaluru India); Kumaran Anushree (Centre for Biotechnology and Biochemical Engineering Amity Institute of Biotechnology Amity University Noida Uttar Pra…		Abhirami S. (Amity University); Kumaran Anushree (Amity University); Sahadevan Smitha (Amity University); Manjunatha Kavitha Guladahalli (Amity University); Akshay Sadanand Dangari (Amity University); Aithal Prarthana (Nagaland University); Rao Rhagavendra (Amity University); Vittal Rajeshwari (Amity University); Akhila D.S. (Amity University)	0	0				https://app.dimensions.ai/details/publication/pub.1174191573	31 Biological Sciences; 41 Environmental Sciences; 4103 Environmental Biotechnology; 4105 Pollution and Contamination
511	pub.1164906222	10.1016/j.rsma.2023.103239			The effect of a mining dam failure on the genetic diversity and population resilience of marine fishes along the eastern Brazilian coast	We used microsatellite DNA markers to examine the impact of the Fundão Dam failure one of the world’s worst mining-related environmental disasters on the genetic diversity of four marine and estuarine fishes across the Brazilian east coast's continental shelf and estuarine ecosystems. The strong mud flow along the Doce River and nearby areas resulted in changes in genetic diversity with all speci…	Declaration of Competing Interest The authors declare that they have no known competing financial interests or personal relationships that could have appeared to influence the work reported in this paper. Acknowledgments We are grateful to Centro Tamar ICMBio specially Nilamon de Oliveira Leite Júnior Carlos Eduardo Stein Lilian Sarmento Bruno Hora local collectors and for ZE-22 for the assistanc…	The present study was carried out as part of the Aquatic Biodiversity Monitoring Program - PMBA established by the Technical-Scientific Agreement (001/2018) UFES-FEST-Renova Foundation.	Regional Studies in Marine Science				2023-12	2023		2023-12	68		103239	Closed	Article	De Biasi Juliana Beltramin; Dias Ricardo Marques; Santos Vinicius Castro; Mantellato Aline Meira Bonfim; Farro Ana Paula Cazerta; Hostim-Silva Mauricio; Hackradt Carlos Werner; Félix-Hackradt Fabiana Cézar	De Biasi Juliana Beltramin (Marine Ecology and Conservation Lab. Center of Environmental Science Universidade Federal do Sul da Bahia Campus Sosígenes Costa Rodovia BR 367 km 10 45810-000 Porto Seguro Bahia Brazil); Dias Ricardo Marques (Marine Ecology and Conservation Lab. Center of Environmental Science Universidade Federal do Sul da Bahia Campus Sosígenes Costa Rodovia BR 367 km 10 45810-000 P…	Félix-Hackradt Fabiana Cézar (Federal University of Para)	De Biasi Juliana Beltramin (Federal University of Para); Dias Ricardo Marques (Federal University of Para); Santos Vinicius Castro (Federal University of Para); Mantellato Aline Meira Bonfim (Federal University of Para); Farro Ana Paula Cazerta (Universidade Federal do Espírito Santo); Hostim-Silva Mauricio (Universidade Federal do Espírito Santo); Hackradt Carlos Werner (Federal University of Pa…	1	1				https://app.dimensions.ai/details/publication/pub.1164906222	31 Biological Sciences; 3103 Ecology; 3105 Genetics	14 Life Below Water
457	pub.1109035602	10.5772/65538			Recent Insights in Petroleum Science and Engineering	This book presents new insights into the development of different aspects of petroleum science and engineering. The book contains 19 chapters divided into two main sections: (i) Exploration and Production and (ii) Environmental Solutions. There are 11 chapters in the first section and the focus is on the topics related to exploration and production of oil and gas such as characterization of petro…					Mansoor Zoveidavianpoor		2018-02-07	2018						Closed	Edited Book					7	2		1.1		https://app.dimensions.ai/details/publication/pub.1109035602	37 Earth Sciences; 3703 Geochemistry; 3705 Geology	12 Responsible Consumption and Production
418	pub.1147017301	10.1142/12912			Plastic Pollution in the Global Ocean	Plastic pollution is a growing environmental problem that is attracting increasing interest across society from academics to the general public. A significant factor in the wide public interest in plastics is its visibility; present throughout urban and rural environments washing up on beaches and even visible from space. However 'invisible' microplastics and nanoplastics are also an issue. With …			Trends in Aquatic Systems				2022-04-10	2022	2022-04-10	2023-01	Volume 1			Closed	Edited Book					3	3		0.97		https://app.dimensions.ai/details/publication/pub.1147017301	41 Environmental Sciences; 4105 Pollution and Contamination	14 Life Below Water
322	pub.1115214676	10.1007/978-3-319-92735-0			Mesophotic Coral Ecosystems	This book summarizes what is known about mesophotic coral ecosystems (MCEs) geographically and by major taxa. MCEs are characterized by light-dependent corals and associated communities typically found at depths ranging from 30-40 m and extending to over 150 m in tropical and subtropical ecosystems. They are populated with organisms typically associated with shallow coral reefs such as macroalgae…			Coral Reefs of the World		Yossi Loya Kimberly A. Puglise Tom C.L. Bridge		2019	2019		2019	12			Closed	Edited Book					121	39		18		https://app.dimensions.ai/details/publication/pub.1115214676	31 Biological Sciences; 3103 Ecology; 41 Environmental Sciences; 4102 Ecological Applications; 4104 Environmental Management
317	pub.1132062536	10.1007/978-3-030-53222-2			Brazilian Deep-Sea Biodiversity	This book presents the biodiversity of the Brazilian deep-sea and its many unique geological and biological features as well as a review of its ecology conservation and future research needs. The deep-sea Brazilian margin has an incredible geological heterogeneity with numerous characteristic seafloor features and latitudinal changes in marine productivity oceanographic conditions and biological …			Brazilian Marine Biodiversity		Paulo Yukio Gomes Sumida Angelo Fraga Bernardino Fabio Cabrera De Léo		2020	2020		2020				All OA; Green	Edited Book					9	5		2.48	https://link.springer.com/content/pdf/bfm:978-3-030-53222-2/1?pdf=chapter%20toc	https://app.dimensions.ai/details/publication/pub.1132062536	31 Biological Sciences; 3103 Ecology; 37 Earth Sciences; 3705 Geology	13 Climate Action
307	pub.1090938470	10.1007/978-3-319-21012-4			Marine Animal Forests The Ecology of Benthic Biodiversity Hotspots	During the last decades there has been an increasing evidence of drastic changes in marine ecosystems due to human-induced impacts especially on benthic ecosystems. The so called “animal forests” are currently showing a dramatic loss of biomass and biodiversity all over the world. These communities are dominated by sessile suspension feeder organisms (such as sponges corals gorgonians bivalves et…					Sergio Rossi Lorenzo Bramanti Andrea Gori Covadonga Orejas		2017	2017		2017				All OA; Green	Edited Book					196	67		26.37	https://link.springer.com/content/pdf/bfm:978-3-319-21012-4/1	https://app.dimensions.ai/details/publication/pub.1090938470	30 Agricultural Veterinary and Food Sciences; 3007 Forestry Sciences; 31 Biological Sciences; 3103 Ecology; 41 Environmental Sciences; 4102 Ecological Applications; 4104 Environmental Management	14 Life Below Water; 15 Life on Land
243	pub.1167386152	10.1007/978-3-031-40897-7			Cold-Water Coral Reefs of the World	Cold-water corals form reef structures in continental margin and seamount settings world-wide making them more wide-spread and abundant than shallow-water reefs. Their role in these ecosystems is no less important than the influence that shallow-water coral reefs have on tropical systems. They create habitat structure host endemic species enhance elemental cycling alter current flow sequester car…			Coral Reefs of the World		Erik Cordes Furu Mienis		2023	2023		2023	19			Closed	Edited Book					1	1				https://app.dimensions.ai/details/publication/pub.1167386152	31 Biological Sciences; 3103 Ecology; 41 Environmental Sciences; 4104 Environmental Management
237	pub.1126919900	10.1007/978-3-030-45909-3			Proceedings of the 2nd International Conference on Microplastic Pollution in the Mediterranean Sea	This book addresses a broad range of issues concerning microplastic pollution including microplastic pollution in various environments (freshwater marine air and soil); the sources fate and effects of microplastics; detection systems for microplastic pollution monitoring; green approaches for the synthesis of environmentally friendly polymers; recovery and recycling of marine plastics; wastewater…			Springer Water		Mariacristina Cocca Emilia Di Pace Maria Emanuela Errico Gennaro Gentile Alessio Montarsolo Raffaella Mossotti Maurizio Avella		2020	2020		2020				All OA; Green	Edited Book					16	9		2.29	https://digital.csic.es/bitstream/10261/320482/1/25927.pdf	https://app.dimensions.ai/details/publication/pub.1126919900	41 Environmental Sciences; 4102 Ecological Applications; 4104 Environmental Management; 4105 Pollution and Contamination	14 Life Below Water
200	pub.1109726013	10.1201/9781420080483			Sharks and Their Relatives II Biodiversity Adaptive Physiology and Conservation						Jeffrey C. Carrier John A. Musick Michael R. Heithaus		2010-03-09	2010	2010-03-09					Closed	Edited Book					55	22				https://app.dimensions.ai/details/publication/pub.1109726013
181	pub.1001626088	10.1007/978-3-319-29315-8			Rhodolith/Maërl Beds: A Global Perspective	Rhodolith beds are recognized internationally as a unique ecosystem and they are the focus of this interdisciplinary book. These marine beds occur worldwide from the tropics to the poles ranging in depth from intertidal to deep subtidal habitats and they are also represented in extensive fossil deposits. In the light of international interest in rhodoliths and maerl concerning their role in coast…			Coastal Research Library		Rafael Riosmena-Rodríguez Wendy Nelson Julio Aguirre		2017	2017		2017	15			Closed	Edited Book					122	27		14.09		https://app.dimensions.ai/details/publication/pub.1001626088	31 Biological Sciences; 3103 Ecology; 41 Environmental Sciences; 4101 Climate Change Impacts and Adaptation; 4104 Environmental Management	13 Climate Action; 14 Life Below Water
162	pub.1150735110	10.25226/bboc.v142i3.2022.a12			Full Issue				Bulletin of the British Ornithologists Club				2022-09-06	2022	2022-09-06		142	3	275-382	All OA; Gold	Article					0	0		0	https://bioone.org/journals/bulletin-of-the-british-ornithologists-club/volume-142/issue-3/bboc.v142i3.2022.a12/Full-Issue/10.25226/bboc.v142i3.2022.a12.pdf	https://app.dimensions.ai/details/publication/pub.1150735110	31 Biological Sciences; 3109 Zoology
146	pub.1163649282	10.1007/978-3-031-34854-9			Conservation Genetics in the Neotropics	This book explores how genetics and the new technologies in genomics have been used for conservation of plants and animals in the Neotropics. It shows the new perspective for conservation genetics beyond the use of theoretical and methods in genetics at species level and presents how genetics and genomics can be used for assessing communities. Conservation genetics and genomics are presented as a…					Pedro M. Galetti Jr.		2023	2023		2023				Closed	Edited Book					1	1				https://app.dimensions.ai/details/publication/pub.1163649282	31 Biological Sciences; 3103 Ecology; 3105 Genetics; 43 History Heritage and Archaeology	15 Life on Land
121	pub.1104111864	10.1007/978-3-319-75556-4			Weird IR Deviant Cases in International Relations	The scholarly study of international relations tends to go over the same cases issues and themes. This book addresses this by challenging readers to think creatively about international politics. It highlights some of the strangest and rarest phenomena in diplomacy and world politics. Comprised of a series of vignettes and organized by common themes like nonsensical borders quasi-countries and di…							2019	2019		2019				Closed	Monograph	Mislan David Bell; Streich Philip	Mislan David Bell (American University Washington District of Columbia USA); Streich Philip (School of Human Sciences Osaka University Suita Osaka Japan)		Mislan David Bell (American University); Streich Philip (Osaka University)	3	2		1.83		https://app.dimensions.ai/details/publication/pub.1104111864	44 Human Society; 4408 Political Science
13	pub.1129946069	10.1525/9780520943728			Encyclopedia of Islands						Rosemary Gillespie David Clague		2019-07-11	2019	2019-07-11	2019-12-31	2			Closed	Edited Book					41	1				https://app.dimensions.ai/details/publication/pub.1129946069
7	pub.1138364963	10.1007/978-3-030-58631-7			Encyclopedia of Solid Earth Geophysics	In the 21st century the importance of earth sciences in the pursuit of knowledge and understanding of the planet on which we live has increased tremendously. Above all they address the challenge of enriching human lives with the bounties of nature while preserving the planet for future generations. The chief goals of Solid Earth Geophysics are to define and quantify the internal structure and pro…			Encyclopedia of Earth Sciences Series		Harsh K. Gupta		2021	2021		2021				All OA; Green	Edited Book					18	11		7.42	https://link.springer.com/content/pdf/bfm:978-3-030-58631-7/1?pdf=chapter%20toc	https://app.dimensions.ai/details/publication/pub.1138364963	37 Earth Sciences; 3705 Geology	2 Zero Hunger

## Sheet: Google Scholar (PoP)
Cites	Authors	Title	Year	Source	Publisher	ArticleURL	CitesURL	GSRank	QueryDate	Type	DOI	ISSN	CitationURL	Volume	Issue	StartPage	EndPage	ECC	CitesPerYear	CitesPerAuthor	AuthorCount	Age	Abstract	FullTextURL	RelatedURL
330	JT Staley	The bacterial species dilemma and the genomic–phylogenetic species concept	2006	… Transactions of the Royal Society B …	royalsocietypublishing.org	https://royalsocietypublishing.org/doi/abs/10.1098/rstb.2006.1914	https://scholar.google.com/scholar?cites=15452893596047709225&as_sdt=2005&sciodt=2007&hl=en	88	2024-08-02 01:22:46		10.1098/rstb.2006.1914							330	18.33	330	1	18	… Recently 16S rRNA gene sequencing and phylogenetic analysis have been applied to bacterial taxonomy. Although 16S phylogeny is arguably excellent for classification of Bacteria …	https://www.ncbi.nlm.nih.gov/pmc/articles/PMC1857736/	https://scholar.google.com/scholar?q=related:KRRVSNq0c9YJ:scholar.google.com/&scioq=%22trindade+island%22+metagenomics%7Cshotgun%7Camplicons+18s%7C16s%7Cits%7C%22internal+transcribed+spacer%22&hl=en&as_sdt=2007
242	VS Pylro LFW Roesch DK Morais IM Clark ...	Data analysis for 16S microbial profiling from different benchtop sequencing platforms	2014	Journal of …	Elsevier	https://www.sciencedirect.com/science/article/pii/S0167701214002528	https://scholar.google.com/scholar?cites=2667237382618050243&as_sdt=2005&sciodt=2007&hl=en	27	2024-08-02 01:22:46	HTML								242	24.2	48	5	10	… Scientific and technological advances including metagenomics and metatranscriptomics have … and Atlantic Ocean with the Trindade Island in relief. (B) Trindade Island. Sample sites are …	https://www.sciencedirect.com/science/article/pii/S0167701214002528	https://scholar.google.com/scholar?q=related:w26XkkTuAyUJ:scholar.google.com/&scioq=%22trindade+island%22+metagenomics%7Cshotgun%7Camplicons+18s%7C16s%7Cits%7C%22internal+transcribed+spacer%22&hl=en&as_sdt=2007
167	BM Feitoza RS Rosa LA Rocha	Ecology and zoogeography of deep-reef fishes in northeastern Brazil	2005	Bulletin of Marine Science	ingentaconnect.com	https://www.ingentaconnect.com/content/umrsmas/bullmar/2005/00000076/00000003/art00010	https://scholar.google.com/scholar?cites=2123945602632445131&as_sdt=2005&sciodt=2007&hl=en	32	2024-08-02 01:22:46									167	8.79	56	3	19	… Collecting gear included spear guns dip nets and fish anesthetics. Material obtained from … We thank Mar Aberto Dive School and its staff for the fundamental logistical support for …	https://repository.si.edu/bitstream/handle/10088/3863/Feitoza_etal_2005.pdf	https://scholar.google.com/scholar?q=related:y-wov0XFeR0J:scholar.google.com/&scioq=%22trindade+island%22+metagenomics%7Cshotgun%7Camplicons+18s%7C16s%7Cits%7C%22internal+transcribed+spacer%22&hl=en&as_sdt=2007
151	HT Pinheiro E Mazzei RL Moura GM Amado-Filho ...	Fish biodiversity of the Vitória-Trindade Seamount Chain southwestern Atlantic: an updated database	2015	PloS one	journals.plos.org	https://journals.plos.org/plosone/article?id=10.1371/journal.pone.0118180	https://scholar.google.com/scholar?cites=13265578779988168000&as_sdt=2005&sciodt=2007&hl=en	11	2024-08-02 01:22:46	HTML								151	16.78	30	5	9	… Two new species belonging to the genera Opistognathus and Lythrypnus were found at seamounts and Trindade Island. Five species previously considered endemic to Trindade and …	https://journals.plos.org/plosone/article?id=10.1371/journal.pone.0118180	https://scholar.google.com/scholar?q=related:QI0nyZ3NGLgJ:scholar.google.com/&scioq=%22trindade+island%22+metagenomics%7Cshotgun%7Camplicons+18s%7C16s%7Cits%7C%22internal+transcribed+spacer%22&hl=en&as_sdt=2007
113	BM Shamblin KA Bjorndal AB Bolten ...	Mitogenomic sequences better resolve stock structure of southern Greater Caribbean green turtle rookeries	2012	Molecular …	Wiley Online Library	https://onlinelibrary.wiley.com/doi/abs/10.1111/j.1365-294X.2012.05530.x	https://scholar.google.com/scholar?cites=12046828853582923524&as_sdt=2005&sciodt=2007&hl=en	24	2024-08-02 01:22:46		10.1111/j.1365-294X.2012.05530.x							113	9.42	28	4	12	… The control region amplicons were sequenced in a single direction with LCM15382 and an internal forward sequencing primer (Cm15821 TCACGAGAAATAAGCAAC) using ABI BigD…	https://www.academia.edu/download/40482718/Mitogenomic_sequences_better_resolve_sto20151129-32176-nqyjqk.pdf	https://scholar.google.com/scholar?q=related:BIe89wPvLqcJ:scholar.google.com/&scioq=%22trindade+island%22+metagenomics%7Cshotgun%7Camplicons+18s%7C16s%7Cits%7C%22internal+transcribed+spacer%22&hl=en&as_sdt=2007
99	CB Thompson	Challenge to imperialism: the frontline states in the liberation of Zimbabwe	2019		taylorfrancis.com	https://www.taylorfrancis.com/books/mono/10.4324/9780429038570/challenge-imperialism-carol-thompson	https://scholar.google.com/scholar?cites=7504188156093724204&as_sdt=2005&sciodt=2007&hl=en	116	2024-08-02 01:22:46	BOOK	10.4324/9780429038570							99	19.8	99	1	5	… its outcome but this study will assess the obstacles which must be overcome to achieve its … They must be transformed after the guns are laid down. Very few revolutionary governments …		https://scholar.google.com/scholar?q=related:LPaoe147JGgJ:scholar.google.com/&scioq=%22trindade+island%22+metagenomics%7Cshotgun%7Camplicons+18s%7C16s%7Cits%7C%22internal+transcribed+spacer%22&hl=en&as_sdt=2007
96	T Jin Y Wang Y Huang J Xu P Zhang N Wang ...	Taxonomic structure and functional association of foxtail millet root microbiome	2017	…	academic.oup.com	https://academic.oup.com/gigascience/article-pdf/doi/10.1093/gigascience/gix089/33701558/gix089.pdf	https://scholar.google.com/scholar?cites=4004010263688874479&as_sdt=2005&sciodt=2007&hl=en	36	2024-08-02 01:22:46	PDF	10.1093/gigascience/gix089/33701558/gix089							96	13.71	14	7	7	… been extensively investigated by 16S/18S/ITS amplicons and metagenomic sequencing in crops and … isolated from the coast of Trindade Island Brazil. Braz J Microbio 2016;00:000-. 35. …	https://academic.oup.com/gigascience/article-pdf/doi/10.1093/gigascience/gix089/33701558/gix089.pdf	https://scholar.google.com/scholar?q=related:74kx5B4akTcJ:scholar.google.com/&scioq=%22trindade+island%22+metagenomics%7Cshotgun%7Camplicons+18s%7C16s%7Cits%7C%22internal+transcribed+spacer%22&hl=en&as_sdt=2007
90	J Schultz AS Rosado	Extreme environments: a source of biosurfactants for biotechnological applications	2020	Extremophiles	Springer	https://link.springer.com/article/10.1007/s00792-019-01151-2	https://scholar.google.com/scholar?cites=5949925086504412158&as_sdt=2005&sciodt=2007&hl=en	43	2024-08-02 01:22:46		10.1007/s00792-019-01151-2							90	22.5	45	2	4	… Research can also be carried out based on the similarity of the metagenomic sequences against a gene or protein database requiring a complete and cured database of information …	https://www.researchgate.net/profile/Alexandre-Rosado/publication/337903158_Extreme_environments_a_source_of_biosurfactants_for_biotechnological_applications/links/5f9ae66d299bf1b53e4f301e/Extreme-environments-a-source-of-biosurfactants-for-biotechnological-applications.pdf?_sg%5B0%5D=started_experiment_milestone&_sg%5B1%5D=started_experiment_milestone&origin=journalDetail	https://scholar.google.com/scholar?q=related:_uNHlVdhklIJ:scholar.google.com/&scioq=%22trindade+island%22+metagenomics%7Cshotgun%7Camplicons+18s%7C16s%7Cits%7C%22internal+transcribed+spacer%22&hl=en&as_sdt=2007
86	M Mahjoubi S Cappello Y Souissi ...	Microbial bioremediation of petroleum hydrocarbon–contaminated marine environments	2018	Recent insights in …	books.google.com	https://books.google.com/books?hl=en&lr=&id=-9CPDwAAQBAJ&oi=fnd&pg=PA325&dq=%22trindade+island%22+metagenomics%7Cshotgun%7Camplicons+18s%7C16s%7Cits%7C%22internal+transcribed+spacer%22&ots=Cnka0UZycD&sig=cg-KJYYWB9YKBfZr-E6rXFKi_V8	https://scholar.google.com/scholar?cites=10572089765524025829&as_sdt=2005&sciodt=2007&hl=en	95	2024-08-02 01:22:46									86	14.33	22	4	6	… of pollutant and its characteristics (the physicochemical nature of the pollutant and its toxicity) … Depending on its location we distinguish in situ and ex situ contaminated site remediation …	https://www.intechopen.com/chapters/58250	https://scholar.google.com/scholar?q=related:5TGa36Cbt5IJ:scholar.google.com/&scioq=%22trindade+island%22+metagenomics%7Cshotgun%7Camplicons+18s%7C16s%7Cits%7C%22internal+transcribed+spacer%22&hl=en&as_sdt=2007
66	PM Meirelles GM Amado-Filho GH Pereira-Filho ...	Baseline assessment of mesophotic reefs of the Vitória-Trindade Seamount Chain based on water quality microbial diversity benthic cover and fish biomass …	2015	PloS one	journals.plos.org	https://journals.plos.org/plosone/article?id=10.1371/journal.pone.0130084	https://scholar.google.com/scholar?cites=2906127303708266046&as_sdt=2005&sciodt=2007&hl=en	9	2024-08-02 01:22:46	HTML								66	7.33	17	4	9	… and Trindade Island we were … metagenome sizes we present the metagenomic data as relative abundances (the number of sequences of a given taxa or subsystem of a metagenome …	https://journals.plos.org/plosone/article?id=10.1371/journal.pone.0130084	https://scholar.google.com/scholar?q=related:Pk6YqWKjVCgJ:scholar.google.com/&scioq=%22trindade+island%22+metagenomics%7Cshotgun%7Camplicons+18s%7C16s%7Cits%7C%22internal+transcribed+spacer%22&hl=en&as_sdt=2007
63	EM Rodrigues KHM Kalks MR Tótola	Prospect isolation and characterization of microorganisms for potential use in cases of oil bioremediation along the coast of Trindade Island Brazil	2015	Journal of environmental …	Elsevier	https://www.sciencedirect.com/science/article/pii/S0301479715001462	https://scholar.google.com/scholar?cites=1380463516132906676&as_sdt=2005&sciodt=2007&hl=en	3	2024-08-02 01:22:46									63	7	21	3	9	… incubated in the coastal water of Trindade Island Brazil for 60 days. … as partial sequencing of the 16S rRNA gene and analysis of … The positive control amplicons were sequenced which …		https://scholar.google.com/scholar?q=related:tBZ9AEFkKBMJ:scholar.google.com/&scioq=%22trindade+island%22+metagenomics%7Cshotgun%7Camplicons+18s%7C16s%7Cits%7C%22internal+transcribed+spacer%22&hl=en&as_sdt=2007
63	GM Amado-Filho RG Bahia GH Pereira-Filho ...	South Atlantic rhodolith beds: Latitudinal distribution species composition structure and ecosystem functions threats and conservation status	2017	Rhodolith/Maërl beds: A …	Springer	https://link.springer.com/chapter/10.1007/978-3-319-29315-8_12	https://scholar.google.com/scholar?cites=9036777123966171864&as_sdt=2005&sciodt=2007&hl=en	30	2024-08-02 01:22:46		10.1007/978-3-319-29315-8_12							63	9	16	4	7	… waters surrounding Trindade Island. The insular platforms of … and its phenotype described we should know about its … ) in the rhodolith metagenome suggesting an important role in …		https://scholar.google.com/scholar?q=related:2DphVOoUaX0J:scholar.google.com/&scioq=%22trindade+island%22+metagenomics%7Cshotgun%7Camplicons+18s%7C16s%7Cits%7C%22internal+transcribed+spacer%22&hl=en&as_sdt=2007
62	P Tiralerdpanich P Sonthiphand E Luepromchai ...	Potential microbial consortium involved in the biodegradation of diesel hexadecane and phenanthrene in mangrove sediment explored by metagenomics analysis	2018	Marine pollution …	Elsevier	https://www.sciencedirect.com/science/article/pii/S0025326X18304120	https://scholar.google.com/scholar?cites=4991013738323468051&as_sdt=2005&sciodt=2007&hl=en	19	2024-08-02 01:22:46									62	10.33	16	4	6	… A 16S rRNA gene amplicon sequence analysis revealed that the major bacterial assemblages detected were Gammaproteobacteria Deltaproteobacteria Alphaproteobacteria. The …		https://scholar.google.com/scholar?q=related:E1_dLY2kQ0UJ:scholar.google.com/&scioq=%22trindade+island%22+metagenomics%7Cshotgun%7Camplicons+18s%7C16s%7Cits%7C%22internal+transcribed+spacer%22&hl=en&as_sdt=2007
56	MO Idris HC Kim AA Yaqoob MNM Ibrahim	Exploring the effectiveness of microbial fuel cell for the degradation of organic pollutants coupled with bio-energy generation	2022	… Energy Technologies and …	Elsevier	https://www.sciencedirect.com/science/article/pii/S2213138822002351	https://scholar.google.com/scholar?cites=15810631995697207348&as_sdt=2005&sciodt=2007&hl=en	96	2024-08-02 01:22:46									56	28	14	4	2	The ongoing global industrialization has contributed in a significant increase in the release of toxic pollutants into the environment the majority of which are primarily organic pollutions. …		https://scholar.google.com/scholar?q=related:NBj1IQimatsJ:scholar.google.com/&scioq=%22trindade+island%22+metagenomics%7Cshotgun%7Camplicons+18s%7C16s%7Cits%7C%22internal+transcribed+spacer%22&hl=en&as_sdt=2007
55	W Zhang Q Zhang M Li H Wang Y Li H Peng ...	Microbial community and function evaluation in the start-up period of bioaugmented SBR fed with aniline wastewater	2021	Bioresource …	Elsevier	https://www.sciencedirect.com/science/article/pii/S096085242031422X	https://scholar.google.com/scholar?cites=7428777671549634001&as_sdt=2005&sciodt=2007&hl=en	56	2024-08-02 01:22:46									55	18.33	8	7	3	… However metagenomics technology is relatively limited in … In this work metagenomics technology was used to … and draw metabolic pathway map based on metagenomics analysis. (4) …		https://scholar.google.com/scholar?q=related:0cUR1O5RGGcJ:scholar.google.com/&scioq=%22trindade+island%22+metagenomics%7Cshotgun%7Camplicons+18s%7C16s%7Cits%7C%22internal+transcribed+spacer%22&hl=en&as_sdt=2007
51	A Gurney	Compass: a story of exploration and innovation	2004		WW Norton &Company		https://scholar.google.com/scholar?cites=11296335829168564773&as_sdt=2005&sciodt=2007&hl=en	71	2024-08-02 01:22:46	CITATION								51	2.55	51	1	20		https://www.curesma.org/wp-content/uploads/2019/07/compass_spring2007.pdf	https://scholar.google.com/scholar?q=related:JSocCZalxJwJ:scholar.google.com/&scioq=%22trindade+island%22+metagenomics%7Cshotgun%7Camplicons+18s%7C16s%7Cits%7C%22internal+transcribed+spacer%22&hl=en&as_sdt=2007
49	T Simon RM Macieira JC Joyeux	The shore fishes of the Trindade–Martin Vaz insular complex: an update	2013	Journal of Fish Biology	Wiley Online Library	https://onlinelibrary.wiley.com/doi/abs/10.1111/jfb.12126	https://scholar.google.com/scholar?cites=14127276785969995799&as_sdt=2005&sciodt=2007&hl=en	28	2024-08-02 01:22:46		10.1111/jfb.12126							49	4.45	16	3	11	… The new occurrences for Trindade Island are based on … Fishes were collected with hand nets and spear guns or photographed … puncticulatus is considered valid for Trindade Island. …	https://www.academia.edu/download/56187069/2013-JFB-simon_macieira_joyeux.pdf	https://scholar.google.com/scholar?q=related:FyBdJ2MrDsQJ:scholar.google.com/&scioq=%22trindade+island%22+metagenomics%7Cshotgun%7Camplicons+18s%7C16s%7Cits%7C%22internal+transcribed+spacer%22&hl=en&as_sdt=2007
46	CR Delgado-González A Madariaga-Navarrete ...	Advances and applications of water phytoremediation: A potential biotechnological approach for the treatment of heavy metals from contaminated water	2021	International Journal of …	mdpi.com	https://www.mdpi.com/1660-4601/18/10/5215	https://scholar.google.com/scholar?cites=10667988978803200405&as_sdt=2005&sciodt=2007&hl=en	115	2024-08-02 01:22:46	HTML								46	15.33	15	3	3	Potable and good-quality drinking water availability is a serious global concern since several pollution sources significantly contribute to low water quality. Amongst these pollution …	https://www.mdpi.com/1660-4601/18/10/5215	https://scholar.google.com/scholar?q=related:ldFYbXRPDJQJ:scholar.google.com/&scioq=%22trindade+island%22+metagenomics%7Cshotgun%7Camplicons+18s%7C16s%7Cits%7C%22internal+transcribed+spacer%22&hl=en&as_sdt=2007
44	NC Roos AR Carvalho PFM Lopes ...	Modeling sensitive parrotfish (Labridae: Scarini) habitats along the Brazilian coast	2015	Marine Environmental …	Elsevier	https://www.sciencedirect.com/science/article/pii/S0141113615300337	https://scholar.google.com/scholar?cites=5807073468651475045&as_sdt=2005&sciodt=2007&hl=en	38	2024-08-02 01:22:46									44	4.89	11	4	9	… Bayesian spatial–temporal approach to map the distribution of these three species along the Brazilian coast using landing data from three different gears (gillnets spear guns and …	https://digital.csic.es/bitstream/10261/353020/1/Roos2015_Modeling_sensitive_parrotfish.pdf	https://scholar.google.com/scholar?q=related:ZRCRc43ellAJ:scholar.google.com/&scioq=%22trindade+island%22+metagenomics%7Cshotgun%7Camplicons+18s%7C16s%7Cits%7C%22internal+transcribed+spacer%22&hl=en&as_sdt=2007
36	DR Couto P Bouchet YI Kantor LRL Simone ...	A multilocus molecular phylogeny of Fasciolariidae (Neogastropoda: Buccinoidea)	2016	Molecular Phylogenetics …	Elsevier	https://www.sciencedirect.com/science/article/pii/S1055790316300173	https://scholar.google.com/scholar?cites=13027498566334883411&as_sdt=2005&sciodt=2007&hl=en	51	2024-08-02 01:22:46									36	4.5	7	5	8	… Molecular markers used were the mitochondrial genes 16S … outgroup terminals in a single amplicon using a combination of … Histone H3: A single amplicon was amplified for 110 ingroup …	https://scholar.harvard.edu/files/ggs/files/2016-01-27_gg.doc	https://scholar.google.com/scholar?q=related:UyZNZuz4yrQJ:scholar.google.com/&scioq=%22trindade+island%22+metagenomics%7Cshotgun%7Camplicons+18s%7C16s%7Cits%7C%22internal+transcribed+spacer%22&hl=en&as_sdt=2007
35	D Morais V Pylro IM Clark PR Hirsch MR Tótola	Responses of microbial community from tropical pristine coastal soil to crude oil contamination	2016	PeerJ	peerj.com	https://peerj.com/articles/1733/	https://scholar.google.com/scholar?cites=5353278800717735790&as_sdt=2005&sciodt=2007&hl=en	6	2024-08-02 01:22:46	HTML								35	4.38	7	5	8	… Bacteria and Fungi) from Trindade Island coastal soil under crude oil … A total of 6 soil samples were analysed by amplicon … (A) 16S rDNA amplicon sequences coordinates analysis …	https://peerj.com/articles/1733/	https://scholar.google.com/scholar?q=related:budo1LSqSkoJ:scholar.google.com/&scioq=%22trindade+island%22+metagenomics%7Cshotgun%7Camplicons+18s%7C16s%7Cits%7C%22internal+transcribed+spacer%22&hl=en&as_sdt=2007
34	BM Shamblin PH Dutton ...	Deeper mitochondrial sequencing reveals cryptic diversity and structure in Brazilian green turtle rookeries	2015	Chelonian …	meridian.allenpress.com	https://meridian.allenpress.com/ccb/article-abstract/14/2/167/190368	https://scholar.google.com/scholar?cites=3390901862876254733&as_sdt=2005&sciodt=2007&hl=en	21	2024-08-02 01:22:46									34	3.78	11	3	9	… differentiation of the northern rookeries from Trindade Island in the south. We reexamined the … We also thank Luciana Moreira for coordination of sample collection at Trindade Island. …	https://repositorio.icmbio.gov.br/bitstream/cecav/2164/1/2015_Deeper_mitochondrial_sequencing_reveals.pdf	https://scholar.google.com/scholar?q=related:DRLzTEfnDi8J:scholar.google.com/&scioq=%22trindade+island%22+metagenomics%7Cshotgun%7Camplicons+18s%7C16s%7Cits%7C%22internal+transcribed+spacer%22&hl=en&as_sdt=2007
33	IR Pedrosa-Gerasmio AB Agmata MD Santos	Genetic diversity population genetic structure and demographic history of Auxis thazard (Perciformes) Selar crumenophthalmus (Perciformes) Rastrelliger kanagurta …	2015	Fisheries research	Elsevier	https://www.sciencedirect.com/science/article/pii/S0165783614002999	https://scholar.google.com/scholar?cites=322388983648650566&as_sdt=2005&sciodt=2007&hl=en	94	2024-08-02 01:22:46									33	3.67	11	3	9	… ) a management unit identified by its unique hydrogeographic regime topography biochemical … The PCR amplicons were then sent to Macrogen Korea for purification and sequencing. …		https://scholar.google.com/scholar?q=related:RoXgkRJbeQQJ:scholar.google.com/&scioq=%22trindade+island%22+metagenomics%7Cshotgun%7Camplicons+18s%7C16s%7Cits%7C%22internal+transcribed+spacer%22&hl=en&as_sdt=2007
32	Z Qin Z Zhao W Jiao Z Han L Xia Y Fang ...	Phenanthrene removal and response of bacterial community in the combined system of photocatalysis and PAH-degrading microbial consortium in laboratory system	2020	Bioresource …	Elsevier	https://www.sciencedirect.com/science/article/pii/S0960852420300055	https://scholar.google.com/scholar?cites=17161126000376991131&as_sdt=2005&sciodt=2007&hl=en	91	2024-08-02 01:22:46									32	8	5	7	4	This work aimed to study the removal of phenanthrene change of bacterial community and microbial functions through combined photocatalysis and biodegradation under ultraviolet (…		https://scholar.google.com/scholar?q=related:m80wfiyRKO4J:scholar.google.com/&scioq=%22trindade+island%22+metagenomics%7Cshotgun%7Camplicons+18s%7C16s%7Cits%7C%22internal+transcribed+spacer%22&hl=en&as_sdt=2007
31	AW Silva-Lima JM Walter GD Garcia N Ramires ...	Multiple Symbiodinium Strains Are Hosted by the Brazilian Endemic Corals Mussismilia spp.	2015	Microbial ecology	Springer	https://link.springer.com/article/10.1007/s00248-015-0573-z	https://scholar.google.com/scholar?cites=6809550388478873052&as_sdt=2005&sciodt=2007&hl=en	14	2024-08-02 01:22:46		10.1007/s00248-015-0573-z							31	3.44	6	5	9	… Symbiodinium C3 was predominant in the larger SAO reef system (Abrolhos) while Symbiodinium B19 was found only in deep samples from the oceanic Trindade Island. …	https://www.academia.edu/download/71284107/Multiple_Symbiodinium_Strains_Are_Hosted20211004-12727-yu5mkz.pdf	https://scholar.google.com/scholar?q=related:3A1o8f9hgF4J:scholar.google.com/&scioq=%22trindade+island%22+metagenomics%7Cshotgun%7Camplicons+18s%7C16s%7Cits%7C%22internal+transcribed+spacer%22&hl=en&as_sdt=2007
31	JD Anderson DJ Shaver ...	Genetic Diversity and Natal Origins of Green Turtles (Chelonia mydas) in the Western Gulf of Mexico	2013	Journal of Herpetology	meridian.allenpress.com	https://meridian.allenpress.com/journal-of-herpetology/article-abstract/47/2/251/67668	https://scholar.google.com/scholar?cites=4060132185616854033&as_sdt=2005&sciodt=2007&hl=en	48	2024-08-02 01:22:46									31	2.82	10	3	11	… Chelonia mydas (Green Turtle) is an extensively studied marine reptile species whose IUCN and CITES endangered status highlights its conservation priority. Conservation efforts are …	https://www.researchgate.net/profile/Joel-Anderson-3/publication/273631876_Genetic_Diversity_and_Natal_Origins_of_Green_Turtles_Chelonia_mydas_in_the_Western_Gulf_of_Mexico/links/55070a290cf2d7a28122b772/Genetic-Diversity-and-Natal-Origins-of-Green-Turtles-Chelonia-mydas-in-the-Western-Gulf-of-Mexico.pdf	https://scholar.google.com/scholar?q=related:EazSGLZ8WDgJ:scholar.google.com/&scioq=%22trindade+island%22+metagenomics%7Cshotgun%7Camplicons+18s%7C16s%7Cits%7C%22internal+transcribed+spacer%22&hl=en&as_sdt=2007
29	K Gupta R Biswas A Sarkar	Advancement of omics: prospects for bioremediation of contaminated soils	2020	Microbial bioremediation &biodegradation	Springer	https://link.springer.com/chapter/10.1007/978-981-15-1812-6_5	https://scholar.google.com/scholar?cites=2579940161249470146&as_sdt=2005&sciodt=2007&hl=en	55	2024-08-02 01:22:46		10.1007/978-981-15-1812-6_5							29	7.25	10	3	4	… However it is not always effective due to its relatively long … edge technologies such as metagenomics metatranscriptomics … Using bacterial 16S rRNA or 18S rRNA gene amplicon and …		https://scholar.google.com/scholar?q=related:wuYJVejJzSMJ:scholar.google.com/&scioq=%22trindade+island%22+metagenomics%7Cshotgun%7Camplicons+18s%7C16s%7Cits%7C%22internal+transcribed+spacer%22&hl=en&as_sdt=2007
25	R Anastácio C Santos C Lopes H Moreira L Souto ...	Reproductive biology and genetic diversity of the green turtle (Chelonia mydas) in Vamizi island Mozambique	2014	SpringerPlus	Springer	https://link.springer.com/article/10.1186/2193-1801-3-540	https://scholar.google.com/scholar?cites=15038653050020158209&as_sdt=2005&sciodt=2007&hl=en	50	2024-08-02 01:22:46	HTML	10.1186/2193-1801-3-540							25	2.5	4	6	10	… We suggest that owing to its context molecular data from the Vamizi rookery may contribute … Amplicons were sequenced in a company: PCR product was sequenced using the BigDye® …	https://link.springer.com/article/10.1186/2193-1801-3-540	https://scholar.google.com/scholar?q=related:AdvLUkUHtNAJ:scholar.google.com/&scioq=%22trindade+island%22+metagenomics%7Cshotgun%7Camplicons+18s%7C16s%7Cits%7C%22internal+transcribed+spacer%22&hl=en&as_sdt=2007
24	FSP da Silva VS Pylro PL Fernandes GS Barcelos ...	Unexplored Brazilian oceanic island host high salt tolerant biosurfactant-producing bacterial strains	2015	Extremophiles	Springer	https://link.springer.com/article/10.1007/s00792-015-0740-7	https://scholar.google.com/scholar?cites=10401438596693969592&as_sdt=2005&sciodt=2007&hl=en	7	2024-08-02 01:22:46		10.1007/s00792-015-0740-7							24	2.67	5	5	9	… These amplicons were quantified by fluorometry using Qubit … in which the Trindade Island belongs is characterized by its high … In Trindade Island part of the existing soil organic matter …	https://www.researchgate.net/profile/Fabio-Sergio-Silva/publication/272624721_Unexplored_Brazilian_oceanic_island_host_high_salt_tolerant_biosurfactant-producing_bacterial_strains/links/5512b2020cf268a4aaeacd47/Unexplored-Brazilian-oceanic-island-host-high-salt-tolerant-biosurfactant-producing-bacterial-strains.pdf	https://scholar.google.com/scholar?q=related:uEr7ZEtVWZAJ:scholar.google.com/&scioq=%22trindade+island%22+metagenomics%7Cshotgun%7Camplicons+18s%7C16s%7Cits%7C%22internal+transcribed+spacer%22&hl=en&as_sdt=2007
24	Q Liu Y Wang S Sun F Tang H Chen S Chen ...	A novel chitosan-biochar immobilized microorganism strategy to enhance bioremediation of crude oil in soil	2023	Chemosphere	Elsevier	https://www.sciencedirect.com/science/article/pii/S0045653522038607	https://scholar.google.com/scholar?cites=8770834173494579132&as_sdt=2005&sciodt=2007&hl=en	105	2024-08-02 01:22:46									24	24	3	7	1	The chitosan-biochar composite is a clean and environmentally friendly immobilized microorganisms carrier. In this study the chitosan-biochar composite as a carrier to immobilize a …		https://scholar.google.com/scholar?q=related:vE8A_zVDuHkJ:scholar.google.com/&scioq=%22trindade+island%22+metagenomics%7Cshotgun%7Camplicons+18s%7C16s%7Cits%7C%22internal+transcribed+spacer%22&hl=en&as_sdt=2007
23	I Ahmad	Microalgae–Bacteria consortia: a review on the degradation of polycyclic aromatic hydrocarbons (PAHs)	2022	Arabian Journal for Science and Engineering	Springer	https://link.springer.com/article/10.1007/s13369-021-06236-9	https://scholar.google.com/scholar?cites=16274616666244797848&as_sdt=2005&sciodt=2007&hl=en	110	2024-08-02 01:22:46		10.1007/s13369-021-06236-9							23	11.5	23	1	2	… Several physicochemical methods can be used for the removal of PAHs; however its bioremediation using microorganisms is a benign and ecofriendly approach. Various strains of …		https://scholar.google.com/scholar?q=related:mFUsn6EN2-EJ:scholar.google.com/&scioq=%22trindade+island%22+metagenomics%7Cshotgun%7Camplicons+18s%7C16s%7Cits%7C%22internal+transcribed+spacer%22&hl=en&as_sdt=2007
21	AL Cypriano‐Souza MH Engel ...	Genetic differentiation between humpback whales (Megaptera novaeangliae) from Atlantic and Pacific breeding grounds of South America	2017	Marine Mammal …	Wiley Online Library	https://onlinelibrary.wiley.com/doi/abs/10.1111/mms.12378	https://scholar.google.com/scholar?cites=2399906122040737463&as_sdt=2005&sciodt=2007&hl=en	47	2024-08-02 01:22:46		10.1111/mms.12378							21	3	7	3	7	Humpback whales wintering in tropical waters along the Atlantic and Pacific coasts of the South American continent are thought to represent distinct populations or “stocks.” Here we …	https://www.researchgate.net/profile/Sandro-Bonatto/publication/310574037_Genetic_differentiation_between_humpback_whales_Megaptera_novaeangliae_from_Atlantic_and_Pacific_breeding_grounds_of_South_America/links/58a444bc4585150402b9ef86/Genetic-differentiation-between-humpback-whales-Megaptera-novaeangliae-from-Atlantic-and-Pacific-breeding-grounds-of-South-America.pdf	https://scholar.google.com/scholar?q=related:t_6FGuctTiEJ:scholar.google.com/&scioq=%22trindade+island%22+metagenomics%7Cshotgun%7Camplicons+18s%7C16s%7Cits%7C%22internal+transcribed+spacer%22&hl=en&as_sdt=2007
19	MIN Di Azevedo AM Iñiguez	Nematode parasites of commercially important fish from the southeast coast of Brazil: morphological and genetic insight	2018	International journal of food microbiology	Elsevier	https://www.sciencedirect.com/science/article/pii/S0168160517305366	https://scholar.google.com/scholar?cites=4014163430660182595&as_sdt=2005&sciodt=2007&hl=en	78	2024-08-02 01:22:46									19	3.17	10	2	6	… using light microscopy and the molecular targets 18S rDNA ITS1 and mtDNA cox2. … The amplicons were directly sequenced using Big Dye Terminator v. 3.1 Cycle Sequencing …		https://scholar.google.com/scholar?q=related:QxLdSl8stTcJ:scholar.google.com/&scioq=%22trindade+island%22+metagenomics%7Cshotgun%7Camplicons+18s%7C16s%7Cits%7C%22internal+transcribed+spacer%22&hl=en&as_sdt=2007
18	Z Khomarbaghi M Shavandi MA Amoozegar ...	Bacterial community dynamics during bioremediation of alkane-and PAHs-contaminated soil of Siri Island Persian Gulf: a microcosm study	2019	International Journal of …	Springer	https://link.springer.com/article/10.1007/s13762-018-02198-y	https://scholar.google.com/scholar?cites=708442266976248425&as_sdt=2005&sciodt=2007&hl=en	35	2024-08-02 01:22:46		10.1007/s13762-018-02198-y							18	3.6	5	4	5	… and bacterial diversity was monitored by 16S rRNA gene PCR and denaturing gradient gel … shifts (Archaea Bacteria and Fungi) in Trindade Island coastal soils. To study the microbial …	https://www.researchgate.net/profile/Zahra-Khomarbaghi/publication/330522981_Bacterial_community_dynamics_during_bioremediation_of_alkane-_and_PAHs-contaminated_soil_of_Siri_island_Persian_Gulf_a_microcosm_study/links/5d2e2339299bf1547cbd0cb4/Bacterial-community-dynamics-during-bioremediation-of-alkane-and-PAHs-contaminated-soil-of-Siri-island-Persian-Gulf-a-microcosm-study.pdf	https://scholar.google.com/scholar?q=related:aeL9An3k1AkJ:scholar.google.com/&scioq=%22trindade+island%22+metagenomics%7Cshotgun%7Camplicons+18s%7C16s%7Cits%7C%22internal+transcribed+spacer%22&hl=en&as_sdt=2007
18	S Sun Y Su S Chen W Cui C Zhao Q Liu	Bioremediation of oil-contaminated soil: exploring the potential of endogenous hydrocarbon degrader Enterobacter sp. SAVR S-1	2022	Applied Soil Ecology	Elsevier	https://www.sciencedirect.com/science/article/pii/S0929139322000038	https://scholar.google.com/scholar?cites=13726512703537076497&as_sdt=2005&sciodt=2007&hl=en	86	2024-08-02 01:22:46									18	9	3	6	2	Enterobacter is commonly found in oil-contaminated soil and plays a vital role in environmental bioremediation. This paper selected Enterobacter sp. SAVR S-1 as a representative to …		https://scholar.google.com/scholar?q=related:Edk245Nefr4J:scholar.google.com/&scioq=%22trindade+island%22+metagenomics%7Cshotgun%7Camplicons+18s%7C16s%7Cits%7C%22internal+transcribed+spacer%22&hl=en&as_sdt=2007
16	LJ Benevides TK Pinto CC José de Anchieta ...	Fish escape behavior as a monitoring tool in the largest Brazilian multiple-use Marine Protected Area	2018	Ocean &Coastal …	Elsevier	https://www.sciencedirect.com/science/article/pii/S0964569117307536	https://scholar.google.com/scholar?cites=15112384496072092548&as_sdt=2005&sciodt=2007&hl=en	98	2024-08-02 01:22:46									16	2.67	4	4	6	Understanding the decision-making process of fish when they escape from approaching spearfishers has a crucial role in elucidating the management conflicts in reef systems. Here …	https://www.academia.edu/download/79291135/160137.pdf	https://scholar.google.com/scholar?q=related:hGt_XaH5udEJ:scholar.google.com/&scioq=%22trindade+island%22+metagenomics%7Cshotgun%7Camplicons+18s%7C16s%7Cits%7C%22internal+transcribed+spacer%22&hl=en&as_sdt=2007
15	EM Rodrigues DK Morais VS Pylro ...	Aliphatic hydrocarbon enhances phenanthrene degradation by autochthonous prokaryotic communities from a pristine seawater	2018	Microbial ecology	Springer	https://link.springer.com/article/10.1007/s00248-017-1078-8	https://scholar.google.com/scholar?cites=2399724315854358624&as_sdt=2005&sciodt=2007&hl=en	13	2024-08-02 01:22:46		10.1007/s00248-017-1078-8							15	2.5	4	4	6	… the microbial community reducing its diversity and thus functional capacity … occur near Trindade Island and similar ecosystems. … Metagenomic DNA was extracted and purified from the …	https://www.academia.edu/download/94108346/s00248-017-1078-820221112-1-bdyyk6.pdf	https://scholar.google.com/scholar?q=related:YMhdDY2ITSEJ:scholar.google.com/&scioq=%22trindade+island%22+metagenomics%7Cshotgun%7Camplicons+18s%7C16s%7Cits%7C%22internal+transcribed+spacer%22&hl=en&as_sdt=2007
15	AR Ribeiro LMA Damasio RAM Silvano	Fishers' ecological knowledge to support conservation of reef fish (groupers) in the tropical Atlantic	2021	Ocean &Coastal Management	Elsevier	https://www.sciencedirect.com/science/article/pii/S0964569121000284	https://scholar.google.com/scholar?cites=17410776075574682368&as_sdt=2005&sciodt=2007&hl=en	81	2024-08-02 01:22:46									15	5	5	3	3	… Therefore the potential impacts of fishing with spear guns should be assessed in the studied region and may be regulations or restrictions on its use could be proposed. However for …		https://scholar.google.com/scholar?q=related:AKN_MJiAn_EJ:scholar.google.com/&scioq=%22trindade+island%22+metagenomics%7Cshotgun%7Camplicons+18s%7C16s%7Cits%7C%22internal+transcribed+spacer%22&hl=en&as_sdt=2007
14	PF Liu ZH Yang YL Chen KH Lo CM Kao	Remediation of weathered diesel-oil contaminated soils using biopile systems: An amendment selection and pilot-scale study	2021	Science of the Total …	Elsevier	https://www.sciencedirect.com/science/article/pii/S0048969721024669	https://scholar.google.com/scholar?cites=9686921221768309868&as_sdt=2005&sciodt=2007&hl=en	45	2024-08-02 01:22:46									14	4.67	3	5	3	… One soil sample (mixed from three soil samples collected from different locations) from each biopile was used for 16S metagenomics analysis after 28 days of operation. NucleoSpin soil …		https://scholar.google.com/scholar?q=related:bGyxFofbboYJ:scholar.google.com/&scioq=%22trindade+island%22+metagenomics%7Cshotgun%7Camplicons+18s%7C16s%7Cits%7C%22internal+transcribed+spacer%22&hl=en&as_sdt=2007
14	CA Rutkowski	A World of UFOs	2008		books.google.com	https://books.google.com/books?hl=en&lr=&id=gMUtNrw5tIsC&oi=fnd&pg=PA8&dq=%22trindade+island%22+metagenomics%7Cshotgun%7Camplicons+18s%7C16s%7Cits%7C%22internal+transcribed+spacer%22&ots=UaMuEaah-H&sig=LlMQ_KxL-jKHJvZ__Zlu1NwW34I	https://scholar.google.com/scholar?cites=9248693555828095981&as_sdt=2005&sciodt=2007&hl=en	74	2024-08-02 01:22:46	BOOK								14	0.88	14	1	16	… ears and clawed hands at the end of long arms that were raised over its head. The men reached inside for their guns and shot at the creature. It appeared to have been hit because it …		https://scholar.google.com/scholar?q=related:7fuTj8n1WYAJ:scholar.google.com/&scioq=%22trindade+island%22+metagenomics%7Cshotgun%7Camplicons+18s%7C16s%7Cits%7C%22internal+transcribed+spacer%22&hl=en&as_sdt=2007
14	R Wang B Wu J Zheng H Chen P Rao L Yan ...	Biodegradation of total petroleum hydrocarbons in soil: Isolation and characterization of bacterial strains from oil contaminated soil	2020	Applied Sciences	mdpi.com	https://www.mdpi.com/2076-3417/10/12/4173	https://scholar.google.com/scholar?cites=10889724499942233296&as_sdt=2005&sciodt=2007&hl=en	80	2024-08-02 01:22:46	HTML								14	3.5	2	7	4	… of the 16S rRNA genes [19]. The amplifications were performed using Taq DNA polymerase under standard reaction conditions. Approximately 1500 bp of each amplicon … Our 16S rRNA …	https://www.mdpi.com/2076-3417/10/12/4173	https://scholar.google.com/scholar?q=related:0NTsiLwSIJcJ:scholar.google.com/&scioq=%22trindade+island%22+metagenomics%7Cshotgun%7Camplicons+18s%7C16s%7Cits%7C%22internal+transcribed+spacer%22&hl=en&as_sdt=2007
12	A Borowik J Wyszkowska J Kucharski	Microbiological study in petrol-spiked soil	2021	Molecules	mdpi.com	https://www.mdpi.com/1420-3049/26/9/2664	https://scholar.google.com/scholar?cites=11417901273818835542&as_sdt=2005&sciodt=2007&hl=en	52	2024-08-02 01:22:46	HTML								12	4	4	3	3	… V3–V4 of the 16S rRNA gene. The mass sequencing of 16S rRNA amplicons were performed by Genomed SA Poland following the Illumina protocol. A fragment of the 16S rRNA gene …	https://www.mdpi.com/1420-3049/26/9/2664	https://scholar.google.com/scholar?q=related:VqpzwraIdJ4J:scholar.google.com/&scioq=%22trindade+island%22+metagenomics%7Cshotgun%7Camplicons+18s%7C16s%7Cits%7C%22internal+transcribed+spacer%22&hl=en&as_sdt=2007
11	VS Silva N Skueresky F Lopes TK Koch PH Ott ...	Integrating morphology and DNA barcoding to assess cetacean diversity in Brazil	2021	Mammal Research	Springer	https://link.springer.com/article/10.1007/s13364-021-00555-w	https://scholar.google.com/scholar?cites=17386753657645841315&as_sdt=2005&sciodt=2007&hl=en	83	2024-08-02 01:22:46		10.1007/s13364-021-00555-w							11	3.67	2	6	3	… Finally we discuss the results with a focus on method validation and its potential … Amplicons were sequenced in both directions using universal primers (M13-FP and M13R-…	https://www.arca.fiocruz.br/bitstream/handle/icict/49425/Salvatore_Siciliano_IOC_etal_2021.pdf?sequence=2&isAllowed=y	https://scholar.google.com/scholar?q=related:ozs0KVUoSvEJ:scholar.google.com/&scioq=%22trindade+island%22+metagenomics%7Cshotgun%7Camplicons+18s%7C16s%7Cits%7C%22internal+transcribed+spacer%22&hl=en&as_sdt=2007
11	B Wang S Kuang H Shao F Cheng H Wang	Improving soil fertility by driving microbial community changes in saline soils of Yellow River Delta under petroleum pollution	2022	Journal of Environmental …	Elsevier	https://www.sciencedirect.com/science/article/pii/S0301479721023276	https://scholar.google.com/scholar?cites=7913106535642177807&as_sdt=2005&sciodt=2007&hl=en	99	2024-08-02 01:22:46									11	5.5	2	5	2	It is promising to use indigenous microorganisms for fertility improvement in petroleum-contaminated coastal soil. As a result the microbial community and physicochemical property are …		https://scholar.google.com/scholar?q=related:DyHG_ncA0W0J:scholar.google.com/&scioq=%22trindade+island%22+metagenomics%7Cshotgun%7Camplicons+18s%7C16s%7Cits%7C%22internal+transcribed+spacer%22&hl=en&as_sdt=2007
10	T Rodrigues A Belmok E Catão CM Kyaw	Archaea in natural and impacted Brazilian environments	2016	Archaea	Wiley Online Library	https://onlinelibrary.wiley.com/doi/abs/10.1155/2016/1259608	https://scholar.google.com/scholar?cites=260531453831391590&as_sdt=2005&sciodt=2007&hl=en	29	2024-08-02 01:22:46		10.1155/2016/1259608							10	1.25	3	4	8	… by metagenomics and metatranscriptomics with Archaea representing 6% of the 16S rDNA … contamination on microbial communities from Trindade Island coastal soils were analyzed …	https://onlinelibrary.wiley.com/doi/pdf/10.1155/2016/1259608	https://scholar.google.com/scholar?q=related:ZqlvFvqXnQMJ:scholar.google.com/&scioq=%22trindade+island%22+metagenomics%7Cshotgun%7Camplicons+18s%7C16s%7Cits%7C%22internal+transcribed+spacer%22&hl=en&as_sdt=2007
10	G Wei G Zhang M Li C Liu F Wei ...	Core rhizosphere microbiome of Panax notoginseng and its associations with belowground biomass and saponin contents	2022	Environmental …	Wiley Online Library	https://ami-journals.onlinelibrary.wiley.com/doi/abs/10.1111/1462-2920.16245	https://scholar.google.com/scholar?cites=13884776364052883617&as_sdt=2005&sciodt=2007&hl=en	39	2024-08-02 01:22:46		10.1111/1462-2920.16245							10	5	2	6	2	… Here we utilized amplicon and metagenomic sequencing to analyse the diversity composition and potential functions of the P. notoginseng rhizosphere microbiome at a large spatial …		https://scholar.google.com/scholar?q=related:oagc1YmisMAJ:scholar.google.com/&scioq=%22trindade+island%22+metagenomics%7Cshotgun%7Camplicons+18s%7C16s%7Cits%7C%22internal+transcribed+spacer%22&hl=en&as_sdt=2007
10	J Buckingham A Capper M Bell	The missing sink-quantification categorisation and sourcing of beached macro-debris in the Scottish Orkney Islands	2020	Marine Pollution Bulletin	Elsevier	https://www.sciencedirect.com/science/article/pii/S0025326X20304823	https://scholar.google.com/scholar?cites=13560829012914446577&as_sdt=2005&sciodt=2007&hl=en	60	2024-08-02 01:22:46									10	2.5	3	3	4	… Litter was collected from 100 m transects and categorised by its material broad source (terrestrial or marine) and potential sector source. Variation between sites and the relative …		https://scholar.google.com/scholar?q=related:8aCTjiO-MbwJ:scholar.google.com/&scioq=%22trindade+island%22+metagenomics%7Cshotgun%7Camplicons+18s%7C16s%7Cits%7C%22internal+transcribed+spacer%22&hl=en&as_sdt=2007
10	PHC Pereira CHR Macedo GV de Lima ...	Effects of depth on reef fish flight initiation distance: implications of deeper reefs conservation	2020	… Biology of Fishes	Springer	https://link.springer.com/article/10.1007/s10641-020-01017-z	https://scholar.google.com/scholar?cites=1614135566174716583&as_sdt=2005&sciodt=2007&hl=en	97	2024-08-02 01:22:46		10.1007/s10641-020-01017-z							10	2.5	3	4	4	… Despite its ecological and commercial importance there are few studies focusing specifically on … fulva escape decisions are influenced by its cryptic behaviour they seem to change risk …	https://www.researchgate.net/profile/Larissa-Benevides/publication/343653790_Effects_of_depth_on_reef_fish_flight_initiation_distance_implications_of_deeper_reefs_conservation/links/5f68bd4392851c14bc8c20b6/Effects-of-depth-on-reef-fish-flight-initiation-distance-implications-of-deeper-reefs-conservation.pdf	https://scholar.google.com/scholar?q=related:pwIr0b6PZhYJ:scholar.google.com/&scioq=%22trindade+island%22+metagenomics%7Cshotgun%7Camplicons+18s%7C16s%7Cits%7C%22internal+transcribed+spacer%22&hl=en&as_sdt=2007
9	C Selvaratnam S Thevarajoo R Ee KG Chan ...	Genome sequence of Roseivirga sp. strain D-25 and its potential applications from the genomic aspect	2016	Marine Genomics	Elsevier	https://www.sciencedirect.com/science/article/pii/S1874778716300290	https://scholar.google.com/scholar?cites=15771206993185631378&as_sdt=2005&sciodt=2007&hl=en	54	2024-08-02 01:22:46									9	1.13	2	5	8	… The whole-genome shotgun sequencing of Roseivirga sp. strain D-25 was performed by using an Illumina MiSeq sequencer (Illumina San Diego CA USA). An Illumina standard pair-…		https://scholar.google.com/scholar?q=related:kmz8azOV3toJ:scholar.google.com/&scioq=%22trindade+island%22+metagenomics%7Cshotgun%7Camplicons+18s%7C16s%7Cits%7C%22internal+transcribed+spacer%22&hl=en&as_sdt=2007
9	Y Delegan Y Kocharovskaya A Bogun A Sizova ...	Characterization and genomic analysis of Exiguobacterium alkaliphilum B-3531D an efficient crude oil degrading strain	2021	Biotechnology …	Elsevier	https://www.sciencedirect.com/science/article/pii/S2215017X21000941	https://scholar.google.com/scholar?cites=6558412981273271878&as_sdt=2005&sciodt=2007&hl=en	90	2024-08-02 01:22:46	HTML								9	3	2	5	3	The aim of the work was to carry out the physiological biochemical and genetic characterization of the Exiguobacterium alkaliphilum B-3531D strain. This strain is promising for use in …	https://www.sciencedirect.com/science/article/pii/S2215017X21000941	https://scholar.google.com/scholar?q=related:Rp4ax9spBFsJ:scholar.google.com/&scioq=%22trindade+island%22+metagenomics%7Cshotgun%7Camplicons+18s%7C16s%7Cits%7C%22internal+transcribed+spacer%22&hl=en&as_sdt=2007
8	GP Cauduro AL Leal M Marmitt LG de Ávila ...	New benzo(a)pyrene-degrading strains of the Burkholderia cepacia complex prospected from activated sludge in a petrochemical wastewater treatment plant	2021	Environmental …	Springer	https://link.springer.com/article/10.1007/s10661-021-08952-z	https://scholar.google.com/scholar?cites=4724456375366213312&as_sdt=2005&sciodt=2007&hl=en	101	2024-08-02 01:22:46		10.1007/s10661-021-08952-z							8	2.67	2	5	3	… Through classic taxonomy methods and metagenomic techniques we can better … identify the isolates based on the similarity of 16S recA and gyrB fragments of our samples to those …	https://orca.cardiff.ac.uk/id/eprint/140052/1/EMAS-D-20-04060_Revision%20One.pdf	https://scholar.google.com/scholar?q=related:wF6IygqkkEEJ:scholar.google.com/&scioq=%22trindade+island%22+metagenomics%7Cshotgun%7Camplicons+18s%7C16s%7Cits%7C%22internal+transcribed+spacer%22&hl=en&as_sdt=2007
8	Y Song R Li G Chen B Yan L Zhong Y Wang ...	Bibliometric analysis of current status on bioremediation of petroleum contaminated soils during 2000–2019	2021	International Journal of …	mdpi.com	https://www.mdpi.com/1660-4601/18/16/8859	https://scholar.google.com/scholar?cites=16056905830848502363&as_sdt=2005&sciodt=2007&hl=en	104	2024-08-02 01:22:46	HTML								8	2.67	1	7	3	… technology more and more technologies for monitoring the dynamics of microbial communities will be applied in bioremediation such as degradative enzyme assays metagenomic/…	https://www.mdpi.com/1660-4601/18/16/8859	https://scholar.google.com/scholar?q=related:W5qfr8eW1d4J:scholar.google.com/&scioq=%22trindade+island%22+metagenomics%7Cshotgun%7Camplicons+18s%7C16s%7Cits%7C%22internal+transcribed+spacer%22&hl=en&as_sdt=2007
8	C Braga-Pinto	The Honor of the Abolitionist and the Shamefulness of Slavery: Raul Pompeia Luiz Gama and Joaquim Nabuco	2014	Luso-Brazilian Review	lbr.uwpress.org	https://lbr.uwpress.org/content/wplbr/51/2/170.full-text.pdf	https://scholar.google.com/scholar?cites=11237478240045376211&as_sdt=2005&sciodt=2007&hl=en	132	2024-08-02 01:22:46									8	0.8	8	1	10	… [fosse] a infâmia de alguns de teus filhos subornados pelo … colony because its economy was never emancipated and its … Britain took possession of the Trindade Island claiming that it …	https://www.academia.edu/download/36196263/TheHonoroftheAbolitionist.pdf	https://scholar.google.com/scholar?q=related:0yIWreuK85sJ:scholar.google.com/&scioq=%22trindade+island%22+metagenomics%7Cshotgun%7Camplicons+18s%7C16s%7Cits%7C%22internal+transcribed+spacer%22&hl=en&as_sdt=2007
7	PEAS Câmara FLV Bones FAC Lopes FS Oliveira ...	DNA metabarcoding reveals cryptic diversity in forest soils on the isolated Brazilian Trindade Island South Atlantic	2023	Microbial ecology	Springer	https://link.springer.com/article/10.1007/s00248-022-02018-4	https://scholar.google.com/scholar?cites=12693162599862092347&as_sdt=2005&sciodt=2007&hl=en	2	2024-08-02 01:22:46		10.1007/s00248-022-02018-4							7	7	1	5	1	… Trindade Island is the most recent volcanic component of Brazilian territory. Its original … Taxonomic assignments were determined for amplicon sequence variants (ASVs) using the …		https://scholar.google.com/scholar?q=related:O8INISIsJ7AJ:scholar.google.com/&scioq=%22trindade+island%22+metagenomics%7Cshotgun%7Camplicons+18s%7C16s%7Cits%7C%22internal+transcribed+spacer%22&hl=en&as_sdt=2007
7	T Brito Devoto MA Toscanini ...	Exploring fungal diversity in Antarctic wildlife: isolation and molecular identification of culturable fungi from penguins and pinnipeds	2022	New Zealand …	Taylor &Francis	https://www.tandfonline.com/doi/abs/10.1080/00480169.2022.2087784	https://scholar.google.com/scholar?cites=8944021931976561450&as_sdt=2005&sciodt=2007&hl=en	16	2024-08-02 01:22:46		10.1080/00480169.2022.2087784							7	3.5	2	3	2	… and the lack of knowledge regarding its impact on the mycobioma of its wildlife the aim of this study … Citation1990) followed by sequencing of the amplicon. Moulds were identified at the …	https://tandf.figshare.com/articles/journal_contribution/Exploring_fungal_diversity_in_Antarctic_wildlife_isolation_and_molecular_identification_of_culturable_fungi_from_penguins_and_pinnipeds/20025252/2/files/36148577.pdf	https://scholar.google.com/scholar?q=related:KhPERo-MH3wJ:scholar.google.com/&scioq=%22trindade+island%22+metagenomics%7Cshotgun%7Camplicons+18s%7C16s%7Cits%7C%22internal+transcribed+spacer%22&hl=en&as_sdt=2007
7	M Sánchez‐González H Álvarez‐Uribe ...	Analysis of a phenol‐adapted microbial community: degradation capacity taxonomy and metabolic description	2019	Journal of applied …	academic.oup.com	https://academic.oup.com/jambio/article-abstract/126/3/771/6714753	https://scholar.google.com/scholar?cites=9417344922854160323&as_sdt=2005&sciodt=2007&hl=en	41	2024-08-02 01:22:46									7	1.4	2	3	5	… The metagenomic data of a 24 h culture with 686 mg l −1 of phenol were analysed using the metagenomic analysis server MG‐RAST. The data set contained 39 016 sequences. The …	https://www.researchgate.net/profile/Rodrigo-Rivera-Solis/publication/329294395_Analysis_of_a_phenol_adapted_microbial_community_degradation_capacity_taxonomy_and_metabolic_description/links/5c50671092851c22a398ac90/Analysis-of-a-phenol-adapted-microbial-community-degradation-capacity-taxonomy-and-metabolic-description.pdf	https://scholar.google.com/scholar?q=related:w_cM5k8hsYIJ:scholar.google.com/&scioq=%22trindade+island%22+metagenomics%7Cshotgun%7Camplicons+18s%7C16s%7Cits%7C%22internal+transcribed+spacer%22&hl=en&as_sdt=2007
7	A Pavan-Kumar AK Jaiswar P Gireesh-Babu ...	Applications of DNA barcoding in fisheries	2020	DNA barcoding and …	Springer	https://link.springer.com/chapter/10.1007/978-3-030-50075-7_11	https://scholar.google.com/scholar?cites=9554025317129755679&as_sdt=2005&sciodt=2007&hl=en	70	2024-08-02 01:22:46		10.1007/978-3-030-50075-7_11							7	1.75	2	4	4	Sustainable management of fish resources requires accurate identification of species for precise assessment of the stock size and recruitment. Molecular markers would complement …		https://scholar.google.com/scholar?q=related:H5ybEmi3loQJ:scholar.google.com/&scioq=%22trindade+island%22+metagenomics%7Cshotgun%7Camplicons+18s%7C16s%7Cits%7C%22internal+transcribed+spacer%22&hl=en&as_sdt=2007
7	G Carrasco S Monzón M San Segundo E García ...	Molecular Characterization and Antimicrobial Susceptibilities of Nocardia Species Isolated from the Soil; A Comparison with Species Isolated from Humans	2020	Microorganisms	mdpi.com	https://www.mdpi.com/2076-2607/8/6/900	https://scholar.google.com/scholar?cites=9231053836153743535&as_sdt=2005&sciodt=2007&hl=en	77	2024-08-02 01:22:46	HTML								7	1.75	1	5	4	… MLSA confirmed the species assignments made by 16S rRNA and gyrB analyses (89.5% and 71.0% respectively) and grouped each soil strain with its corresponding reference and …	https://www.mdpi.com/2076-2607/8/6/900	https://scholar.google.com/scholar?q=related:r2hzRo5KG4AJ:scholar.google.com/&scioq=%22trindade+island%22+metagenomics%7Cshotgun%7Camplicons+18s%7C16s%7Cits%7C%22internal+transcribed+spacer%22&hl=en&as_sdt=2007
6	RH Duarte GCMM Horta	Barth and Trindade Island 1957-1959	2012	História Ciências Saúde-Manguinhos	SciELO Brasil	https://www.scielo.br/j/hcsm/a/FRwCVTDTqQhSJJWWR5xHf7N/?format=html&lang=en	https://scholar.google.com/scholar?cites=18058910031388424707&as_sdt=2005&sciodt=2007&hl=en	10	2024-08-02 01:22:46	HTML								6	0.5	3	2	12	… Unsuccessful in his attempts to defend himself with a stick he picked up a shotgun and … Trindade Island offers an important analogy for our current environmental problems. Its history …	https://www.scielo.br/j/hcsm/a/FRwCVTDTqQhSJJWWR5xHf7N/?format=html&lang=en	https://scholar.google.com/scholar?q=related:AzqlS_4invoJ:scholar.google.com/&scioq=%22trindade+island%22+metagenomics%7Cshotgun%7Camplicons+18s%7C16s%7Cits%7C%22internal+transcribed+spacer%22&hl=en&as_sdt=2007
6	KMF Lubiana C Dias	The composition and new records of micro-and mesophytoplankton near the Vitória-Trindade Seamount Chain	2016	Biota Neotropica	SciELO Brasil	https://www.scielo.br/j/bn/a/g8XQKXZgG76vMsstpw5ZGhf/	https://scholar.google.com/scholar?cites=4126622431549007471&as_sdt=2005&sciodt=2007&hl=en	15	2024-08-02 01:22:46	HTML								6	0.75	3	2	8	… respectively) and just one station close to Trindade Island (E40). The last seven were situated in … and metagenomics would be useful for enhance the knowledge about the community. …	https://www.scielo.br/j/bn/a/g8XQKXZgG76vMsstpw5ZGhf/	https://scholar.google.com/scholar?q=related:byaj2jy1RDkJ:scholar.google.com/&scioq=%22trindade+island%22+metagenomics%7Cshotgun%7Camplicons+18s%7C16s%7Cits%7C%22internal+transcribed+spacer%22&hl=en&as_sdt=2007
6	Q Liu S Sun S Chen Y Su Y Wang F Tang ...	A novel dehydrocoenzyme activator combined with a composite microbial agent TY for enhanced bioremediation of crude oil-contaminated soil	2023	Journal of …	Elsevier	https://www.sciencedirect.com/science/article/pii/S0301479723000348	https://scholar.google.com/scholar?cites=11693286832777441622&as_sdt=2005&sciodt=2007&hl=en	68	2024-08-02 01:22:46									6	6	1	7	1	Bioaugmentation (BA) and biostimulation (BS) synergistic remediation is an effective remediation strategy for oil-contaminated soil. In this study the optimal combination system of …		https://scholar.google.com/scholar?q=related:VrFztGvmRqIJ:scholar.google.com/&scioq=%22trindade+island%22+metagenomics%7Cshotgun%7Camplicons+18s%7C16s%7Cits%7C%22internal+transcribed+spacer%22&hl=en&as_sdt=2007
5	W Kriangwanich K Buddhachat A Poommouang ...	Feasibility of melting fingerprint obtained from ISSR-HRM curves for marine mammal species identification	2021	PeerJ	peerj.com	https://peerj.com/articles/11689/	https://scholar.google.com/scholar?cites=9143081247828559416&as_sdt=2005&sciodt=2007&hl=en	31	2024-08-02 01:22:46	HTML								5	1.67	1	4	3	… The distinction between similar sequences obtained from the same animal species relies on differences in %GC content amplicon length type or position of base substitution …	https://peerj.com/articles/11689/	https://scholar.google.com/scholar?q=related:OEZb6fO_4n4J:scholar.google.com/&scioq=%22trindade+island%22+metagenomics%7Cshotgun%7Camplicons+18s%7C16s%7Cits%7C%22internal+transcribed+spacer%22&hl=en&as_sdt=2007
5	M Mahjoubi S Cappello S Santisi ...	Investigation of microbial community changes in petroleum polluted sediments during hydrocarbons degradation	2022	Soil and Sediment …	Taylor &Francis	https://www.tandfonline.com/doi/abs/10.1080/15320383.2021.1920573	https://scholar.google.com/scholar?cites=14560761697461407801&as_sdt=2005&sciodt=2007&hl=en	62	2024-08-02 01:22:46		10.1080/15320383.2021.1920573							5	2.5	1	4	2	… of 16S rRNA was carried out using Bac27 and Uni_1492 R primers. Purified amplicons representing 16S … Our results are confirmed by the metagenomics data of TST1 which showed an …		https://scholar.google.com/scholar?q=related:ORBNHJ43EsoJ:scholar.google.com/&scioq=%22trindade+island%22+metagenomics%7Cshotgun%7Camplicons+18s%7C16s%7Cits%7C%22internal+transcribed+spacer%22&hl=en&as_sdt=2007
5	PJ Hundt MJ Hundt C Staley MJ Sadowsky ...	The Diet and Gut Microbial Communities of Two Closely Related Combtooth Blennies Chasmodes saburrae and Scartella cristata	2017	Copeia	meridian.allenpress.com	https://meridian.allenpress.com/copeia/article-abstract/105/2/249/196536	https://scholar.google.com/scholar?cites=18151459554370344815&as_sdt=2005&sciodt=2007&hl=en	82	2024-08-02 01:22:46									5	0.71	1	5	7	… Purified amplicons were pooled in equal amounts and paired-end sequenced at a read length of 100 nucleotides (nt) on the Illumina HiSeq2000 platform by the University of Minnesota …	https://www.researchgate.net/profile/Peter-Hundt-2/publication/318171666_The_Diet_and_Gut_Microbial_Communities_of_Two_Closely_Related_Combtooth_Blennies_Chasmodes_saburrae_and_Scartella_cristata/links/623337d9183842419eefe8c7/The-Diet-and-Gut-Microbial-Communities-of-Two-Closely-Related-Combtooth-Blennies-Chasmodes-saburrae-and-Scartella-cristata.pdf	https://scholar.google.com/scholar?q=related:b1cdTUvw5vsJ:scholar.google.com/&scioq=%22trindade+island%22+metagenomics%7Cshotgun%7Camplicons+18s%7C16s%7Cits%7C%22internal+transcribed+spacer%22&hl=en&as_sdt=2007
4	MB Alao EA Adebayo	Current advances in microbial bioremediation of surface and ground water contaminated by hydrocarbon	2022	… in Wastewater Treatment Research and Processes	Elsevier	https://www.sciencedirect.com/science/article/pii/B978032385839700013X	https://scholar.google.com/scholar?cites=13121832647679918334&as_sdt=2005&sciodt=2007&hl=en	102	2024-08-02 01:22:46									4	2	2	2	2	Surface water is easily contaminated by hydrocarbon spillage while several studies have linked infiltration to ground water contamination with diverse implications. Microbial …		https://scholar.google.com/scholar?q=related:_sAVR0UdGrYJ:scholar.google.com/&scioq=%22trindade+island%22+metagenomics%7Cshotgun%7Camplicons+18s%7C16s%7Cits%7C%22internal+transcribed+spacer%22&hl=en&as_sdt=2007
3	ALH Jack E Chapelle K Siegel ...	Comparative metagenomics of disease suppressive soils	2013	… on Soil Metagenomics	hal.science	https://hal.science/hal-01005058/	https://scholar.google.com/scholar?cites=10150932340647490673&as_sdt=2005&sciodt=2007&hl=en	18	2024-08-02 01:22:46									3	0.27	1	4	11	… and bagasse mulching practices determined by Ion torrent ITS amplicon sequencing … shotgun metagenomic sequence analysis including the notions of sequence quality metagenomic …	https://hal.science/hal-01005058/document	https://scholar.google.com/scholar?q=related:cXRRjy5b34wJ:scholar.google.com/&scioq=%22trindade+island%22+metagenomics%7Cshotgun%7Camplicons+18s%7C16s%7Cits%7C%22internal+transcribed+spacer%22&hl=en&as_sdt=2007
3	EM Rodrigues VS Pylro PT Dobbler ...	Draft Genome of Rhodococcus rhodochrous TRN7 Isolated from the Coast of Trindade Island Brazil	2016	Genome …	Am Soc Microbiol	https://journals.asm.org/doi/full/10.1128/genomea.01707-15	https://scholar.google.com/scholar?cites=2736690255228178061&as_sdt=2005&sciodt=2007&hl=en	26	2024-08-02 01:22:46		10.1128/genomea.01707-15							3	0.38	1	4	8	… study will support a better understanding of its metabolism and the application of TRN7 for … shotgun project has been deposited at DDBJ/EMBL/GenBank under the accession numbers …	https://journals.asm.org/doi/pdf/10.1128/genomea.01707-15	https://scholar.google.com/scholar?q=related:jQ4mm0mt-iUJ:scholar.google.com/&scioq=%22trindade+island%22+metagenomics%7Cshotgun%7Camplicons+18s%7C16s%7Cits%7C%22internal+transcribed+spacer%22&hl=en&as_sdt=2007
3	EC Reis RM Albano ACV Bondioli LS Soares ...	Detection of polymorphisms of the mtDNA control region of Caretta caretta (Testudines: Cheloniidae) by PCR-SSCP	2009	Genet Mol …	funpecrp.com.br	http://www.funpecrp.com.br/gmr/year2009/vol8-1/pdf/gmr570.pdf	https://scholar.google.com/scholar?cites=16712902100970741711&as_sdt=2005&sciodt=2007&hl=en	59	2024-08-02 01:22:46	PDF								3	0.2	1	5	15	… For each PCR amplicon a consensus sequence was produced by the BioEdit sequence alignment editor version 7.0.1 (Hall 1999). Mitochondrial haplotypes were classified by …	http://www.funpecrp.com.br/gmr/year2009/vol8-1/pdf/gmr570.pdf	https://scholar.google.com/scholar?q=related:z589fukn8OcJ:scholar.google.com/&scioq=%22trindade+island%22+metagenomics%7Cshotgun%7Camplicons+18s%7C16s%7Cits%7C%22internal+transcribed+spacer%22&hl=en&as_sdt=2007
3	M Mahjoubi S Cappello Y Souissi A Jaouani A Cherif	Chapter Microbial Bioremediation of Petroleum Hydrocarbon–Contaminated Marine Environments	2018		library.oapen.org	https://library.oapen.org/handle/20.500.12657/49241	https://scholar.google.com/scholar?cites=13201980708750379016&as_sdt=2005&sciodt=2007&hl=en	106	2024-08-02 01:22:46									3	0.5	1	5	6	… of pollutant and its characteristics (the physicochemical nature of the pollutant and its toxicity) … Depending on its location we distinguish in situ and ex situ contaminated site remediation …	https://library.oapen.org/bitstream/handle/20.500.12657/49241/58250.pdf?sequence=1	https://scholar.google.com/scholar?q=related:CEig7IHbNrcJ:scholar.google.com/&scioq=%22trindade+island%22+metagenomics%7Cshotgun%7Camplicons+18s%7C16s%7Cits%7C%22internal+transcribed+spacer%22&hl=en&as_sdt=2007
3	M Ryan	The Third Kind: A Compendium of UFO Encounters	2015		books.google.com	https://books.google.com/books?hl=en&lr=&id=EN0fCwAAQBAJ&oi=fnd&pg=PT154&dq=%22trindade+island%22+metagenomics%7Cshotgun%7Camplicons+18s%7C16s%7Cits%7C%22internal+transcribed+spacer%22&ots=6oNDscet3c&sig=g0PM8T8edLTtuXveVikaJt0xkZs	https://scholar.google.com/scholar?cites=14417215090245602014&as_sdt=2005&sciodt=2007&hl=en	108	2024-08-02 01:22:46	BOOK								3	0.33	3	1	9	… At 3:16 am the 37th Coast Artillery Brigade began firing .50 caliber machine guns and 12.8… Saldanha" was moored at a bay in Trindade Island some eight hundred miles off the coast of …		https://scholar.google.com/scholar?q=related:3op9KL08FMgJ:scholar.google.com/&scioq=%22trindade+island%22+metagenomics%7Cshotgun%7Camplicons+18s%7C16s%7Cits%7C%22internal+transcribed+spacer%22&hl=en&as_sdt=2007
2	PEAS Câmara FAC Lopes FLV Bones ...	Investigating aerial diversity of non‐fungal eukaryotes across a 40° latitudinal transect using DNA metabarcoding	2023	Austral …	Wiley Online Library	https://onlinelibrary.wiley.com/doi/abs/10.1111/aec.13332	https://scholar.google.com/scholar?cites=11737146982950936323&as_sdt=2005&sciodt=2007&hl=en	12	2024-08-02 01:22:46		10.1111/aec.13332							2	2	1	4	1	… Extracted DNA was used as template for generating PCR amplicons. The internal transcribed spacer 2 (ITS2) of the nuclear ribosomal DNA was used as DNA barcode for molecular …		https://scholar.google.com/scholar?q=related:A59Ws_644qIJ:scholar.google.com/&scioq=%22trindade+island%22+metagenomics%7Cshotgun%7Camplicons+18s%7C16s%7Cits%7C%22internal+transcribed+spacer%22&hl=en&as_sdt=2007
2	FMS Martins R Godinho L Palma	Cores edges and beyond: insights into the phylogeography of frigatebirds with a focus on ultraperipheral and endemic populations	2022	Conservation Genetics	Springer	https://link.springer.com/article/10.1007/s10592-022-01466-2	https://scholar.google.com/scholar?cites=3508921767347889876&as_sdt=2005&sciodt=2007&hl=en	25	2024-08-02 01:22:46		10.1007/s10592-022-01466-2							2	1	1	3	2	… Amplicons were bidirectionally sequenced to verify sequence consistency and quality using … ariel across almost its whole range we found high intraspecific differentiation in F. minor. …		https://scholar.google.com/scholar?q=related:1CZon8ExsjAJ:scholar.google.com/&scioq=%22trindade+island%22+metagenomics%7Cshotgun%7Camplicons+18s%7C16s%7Cits%7C%22internal+transcribed+spacer%22&hl=en&as_sdt=2007
2	A Duarte-Benvenuto C Sacristán ...	Molecular detection and characterization of Mycoplasma spp. in marine mammals Brazil	2023	Emerging Infectious …	ncbi.nlm.nih.gov	https://www.ncbi.nlm.nih.gov/pmc/articles/PMC10683811/	https://scholar.google.com/scholar?cites=9953929931696903105&as_sdt=2005&sciodt=2007&hl=en	63	2024-08-02 01:22:46	HTML								2	2	1	3	1	… We detected the same 16S rRNA sequence type in 3 different species Franciscana dolphin killer whale and rough-toothed dolphin which belong to 2 different taxonomic families and …	https://www.ncbi.nlm.nih.gov/pmc/articles/PMC10683811/	https://scholar.google.com/scholar?q=related:wRPs4Yh2I4oJ:scholar.google.com/&scioq=%22trindade+island%22+metagenomics%7Cshotgun%7Camplicons+18s%7C16s%7Cits%7C%22internal+transcribed+spacer%22&hl=en&as_sdt=2007
2	JB De Biasi RM Dias VC Santos ...	The effect of a mining dam failure on the genetic diversity and population resilience of marine fishes along the eastern Brazilian coast	2023	Regional Studies in …	Elsevier	https://www.sciencedirect.com/science/article/pii/S2352485523004292	https://scholar.google.com/scholar?cites=11420322374045711278&as_sdt=2005&sciodt=2007&hl=en	92	2024-08-02 01:22:46									2	2	1	4	1	We used microsatellite DNA markers to examine the impact of the Fundão Dam failure one of the world’s worst mining-related environmental disasters on the genetic diversity of four …		https://scholar.google.com/scholar?q=related:rrtwFbEifZ4J:scholar.google.com/&scioq=%22trindade+island%22+metagenomics%7Cshotgun%7Camplicons+18s%7C16s%7Cits%7C%22internal+transcribed+spacer%22&hl=en&as_sdt=2007
2	TFP Araújo	Da ginga à sardinha: Etnoictiologia e sistemática molecular de pequenos peixes de valor cultural da costa brasileira	2020		repositorio.ufrn.br	https://repositorio.ufrn.br/handle/123456789/30003	https://scholar.google.com/scholar?cites=14634881141524943225&as_sdt=2005&sciodt=2007&hl=en	131	2024-08-02 01:22:46									2	0.5	2	1	4	… To establish if “ginga” were being sold below its size at first sexual maturity we calculated the mean and median of the Standard Length (SL) from the snout tip to the beginning of the …	https://repositorio.ufrn.br/bitstream/123456789/30003/1/Gingasardinhaetnoictiologia_Araujo_2020.pdf	https://scholar.google.com/scholar?q=related:eVGo-tuKGcsJ:scholar.google.com/&scioq=%22trindade+island%22+metagenomics%7Cshotgun%7Camplicons+18s%7C16s%7Cits%7C%22internal+transcribed+spacer%22&hl=en&as_sdt=2007
1	FS Freitas PMP Vidigal TP Siqueira M de Barros ...	The draft genome of Staphylococcus warneri TRPF4 a bacteriocin producer with potent activity against the causative agent of Legionnaires' Disease	2020	3 Biotech	Springer	https://link.springer.com/article/10.1007/s13205-020-02231-3	https://scholar.google.com/scholar?cites=8411349197930322725&as_sdt=2005&sciodt=2007&hl=en	34	2024-08-02 01:22:46		10.1007/s13205-020-02231-3							1	0.25	0	5	4	… warneri TRPF4 isolated from Trindade Island Brazil. This strain exhibits potent and specific … warneri strain TRPF4 whole-genome shotgun sequencing project was deposited on DDBJ/…	https://www.ncbi.nlm.nih.gov/pmc/articles/PMC7200953/	https://scholar.google.com/scholar?q=related:JVtnwIcdu3QJ:scholar.google.com/&scioq=%22trindade+island%22+metagenomics%7Cshotgun%7Camplicons+18s%7C16s%7Cits%7C%22internal+transcribed+spacer%22&hl=en&as_sdt=2007
1	F Prado	Anglo-Portuguese Cooperation in Eighteenth-Century Atlantic South America	2021	The Rio de la Plata from Colony to Nations: Commerce …	Springer	https://link.springer.com/chapter/10.1007/978-3-030-60323-6_6	https://scholar.google.com/scholar?cites=18264473696623689912&as_sdt=2005&sciodt=2007&hl=en	37	2024-08-02 01:22:46		10.1007/978-3-030-60323-6_6							1	0.33	1	1	3	… the Lord Clive with 64 guns and smaller ships ranging from 20 to 40 guns. Many British … kept by British traders and soldiers on Trindade Island. Footnote 44 Nevertheless the viceroy …	https://www.academia.edu/download/74894559/Anglo_Portuguese_Alliance_S_Atlantic_From_Colony_to_Nation_2.pdf	https://scholar.google.com/scholar?q=related:uIC4yA5yeP0J:scholar.google.com/&scioq=%22trindade+island%22+metagenomics%7Cshotgun%7Camplicons+18s%7C16s%7Cits%7C%22internal+transcribed+spacer%22&hl=en&as_sdt=2007
1	F Olmos	Endangered birds priorities and conservation policies in Brazil.	2005	The Brazilian Journal of Nature Conservation	researchgate.net	https://www.researchgate.net/profile/Fabio-Olmos/publication/312446022_Aves_ameacadas_prioridades_e_politicas_de_conservacao_no_Brasil/links/631f3a7b70cc936cd301e0a9/Aves-ameacadas-prioridades-e-politicas-de-conservacao-no-Brasil.pdf	https://scholar.google.com/scholar?cites=1724867827999013253&as_sdt=2005&sciodt=2007&hl=en	44	2024-08-02 01:22:46	PDF								1	0.05	1	1	19	… ) while Trindade Island had its forest vegetation devastated by … contribution should have their guns confiscated as part of the “… The argument that guns are necessary because of “safety …	https://www.researchgate.net/profile/Fabio-Olmos/publication/312446022_Aves_ameacadas_prioridades_e_politicas_de_conservacao_no_Brasil/links/631f3a7b70cc936cd301e0a9/Aves-ameacadas-prioridades-e-politicas-de-conservacao-no-Brasil.pdf	https://scholar.google.com/scholar?q=related:hXlhnCb27xcJ:scholar.google.com/&scioq=%22trindade+island%22+metagenomics%7Cshotgun%7Camplicons+18s%7C16s%7Cits%7C%22internal+transcribed+spacer%22&hl=en&as_sdt=2007
1	B Sarkar AK Mandal A Ghati P Ghosh ...	Whole-Genome Shotgun (WGS) Sequence of cis-Isoprene Polymer-Degrading Nocardia sp. strain BSTN01	2022	Microbiology …	Am Soc Microbiol	https://journals.asm.org/doi/abs/10.1128/mra.01175-21	https://scholar.google.com/scholar?cites=594368431899689559&as_sdt=2005&sciodt=2007&hl=en	49	2024-08-02 01:22:46		10.1128/mra.01175-21							1	0.5	0	5	2	… Here we report the whole-genome shotgun (WGS) sequence of Nocardia sp. strain BSTN01 isolated from stored water in latex-collecting cups thrown away near a local rubber …	https://journals.asm.org/doi/pdf/10.1128/mra.01175-21	https://scholar.google.com/scholar?q=related:V0IWkfCePwgJ:scholar.google.com/&scioq=%22trindade+island%22+metagenomics%7Cshotgun%7Camplicons+18s%7C16s%7Cits%7C%22internal+transcribed+spacer%22&hl=en&as_sdt=2007
1	JL Carlin	Genetic variation among populations and species of groupers and coralgroupers (Osteichthyes: Serranidae: Epinephelinae)	2003		search.proquest.com	https://search.proquest.com/openview/33c94790de0317ad3d05631ef9cdb141/1?pq-origsite=gscholar&cbl=18750&diss=y	https://scholar.google.com/scholar?cites=4638309594696279099&as_sdt=2005&sciodt=2007&hl=en	57	2024-08-02 01:22:46	BOOK								1	0.05	1	1	21	… Brazilian rock hind specimens were collected from Trindade Island and the mainland states … except for comparisons with South Carolina and Trindade Island for which low sample sizes …		https://scholar.google.com/scholar?q=related:O2QoZgCWXkAJ:scholar.google.com/&scioq=%22trindade+island%22+metagenomics%7Cshotgun%7Camplicons+18s%7C16s%7Cits%7C%22internal+transcribed+spacer%22&hl=en&as_sdt=2007
1	VC da Silva N Fernandes	Protist taxonomic and functional diversity in aquatic ecosystems of the Brazilian Atlantic Forest	2023	PeerJ	peerj.com	https://peerj.com/articles/15762/	https://scholar.google.com/scholar?cites=10193318928193076653&as_sdt=2005&sciodt=2007&hl=en	64	2024-08-02 01:22:46	HTML								1	1	1	2	1	… the V4 region of the eukaryotic 18S rRNA gene in PCR reactions with the Phusion® High-Fidelity PCR Master Mix (New England Biolabs USA). The amplicons were sequenced with an …	https://peerj.com/articles/15762/	https://scholar.google.com/scholar?q=related:rb02BY_xdY0J:scholar.google.com/&scioq=%22trindade+island%22+metagenomics%7Cshotgun%7Camplicons+18s%7C16s%7Cits%7C%22internal+transcribed+spacer%22&hl=en&as_sdt=2007
1	KG Rodríguez-Castro BH Saranholi ...	Environmental and invertebrate-derived DNA: A powerful approach for surveying and monitoring biodiversity	2023	… Genetics in the …	Springer	https://link.springer.com/chapter/10.1007/978-3-031-34854-9_18	https://scholar.google.com/scholar?cites=18304473890703111425&as_sdt=2005&sciodt=2007&hl=en	67	2024-08-02 01:22:46		10.1007/978-3-031-34854-9_18							1	1	0	3	1	… and a necessity to characterize an area and estimate its natural values. However performing … over traditional biodiversity sampling due to its higher sensitivity and reduced cost and time …	https://mz.usp.br/wp-content/uploads/2023/02/10-1.pdf	https://scholar.google.com/scholar?q=related:AXXFtwWOBv4J:scholar.google.com/&scioq=%22trindade+island%22+metagenomics%7Cshotgun%7Camplicons+18s%7C16s%7Cits%7C%22internal+transcribed+spacer%22&hl=en&as_sdt=2007
1	JE Carter MA Sporre RI Eytan	Phylogenetic review of the comb-tooth blenny genus Hypleurochilus in the northwest Atlantic and Gulf of Mexico	2023	Molecular Phylogenetics and Evolution	Elsevier	https://www.sciencedirect.com/science/article/pii/S1055790323002336	https://scholar.google.com/scholar?cites=7718871793173249880&as_sdt=2005&sciodt=2007&hl=en	73	2024-08-02 01:22:46									1	1	0	3	1	… GoM east coast of the United States and Curacao using dipnets or on SCUBA using slurp guns and quinaldine sulfate anesthetic. Specimens were photographed immediately after …		https://scholar.google.com/scholar?q=related:WL_f4v_wHmsJ:scholar.google.com/&scioq=%22trindade+island%22+metagenomics%7Cshotgun%7Camplicons+18s%7C16s%7Cits%7C%22internal+transcribed+spacer%22&hl=en&as_sdt=2007
1	A Ledezma-Villanueva JM Adame-Rodríguez ...	Transcriptomics as a First Choice Gate for Fungal Biodegradation Processes Description	2018	… in Bioremediation: The …	Springer	https://link.springer.com/chapter/10.1007/978-3-030-02369-0_2	https://scholar.google.com/scholar?cites=13430430851477277297&as_sdt=2005&sciodt=2007&hl=en	85	2024-08-02 01:22:46		10.1007/978-3-030-02369-0_2							1	0.17	0	3	6	… communities related with the process (this can be achieved by a metagenomic approach). … the internal transcribed spacer regions ITS-1 and ITS-2 which are variable regions (the ITS …		https://scholar.google.com/scholar?q=related:cQrAsrN5YroJ:scholar.google.com/&scioq=%22trindade+island%22+metagenomics%7Cshotgun%7Camplicons+18s%7C16s%7Cits%7C%22internal+transcribed+spacer%22&hl=en&as_sdt=2007
1	JC Mangel A Rees M Pajuelo F Córdova N Acuña	Proceedings of the Thirty-Sixth Annual Symposium on Sea Turtle Biology and Conservation	2019		repository.library.noaa.gov	https://repository.library.noaa.gov/view/noaa/19835	https://scholar.google.com/scholar?cites=6792351933255507353&as_sdt=2005&sciodt=2007&hl=en	93	2024-08-02 01:22:46									1	0.2	0	5	5	… material herein or which has as its purpose any intent to cause … amplicons was used to sequence CFPHV from the tumors of three Florida sea turtle species. The sequenced amplicons …	https://repository.library.noaa.gov/view/noaa/19835/noaa_19835_DS1.pdf	https://scholar.google.com/scholar?q=related:md0hixhIQ14J:scholar.google.com/&scioq=%22trindade+island%22+metagenomics%7Cshotgun%7Camplicons+18s%7C16s%7Cits%7C%22internal+transcribed+spacer%22&hl=en&as_sdt=2007
1	LH Hall	JOAO PANDIA CALOGERAS MINISTER OF WAR 1919-1922; THE ROLE OF A CIVILIAN IN THE DEVELOPMENT OF THE BRAZILIAN ARMY	1984		search.proquest.com	https://search.proquest.com/openview/e74ac82c472d04e79d27005dc4746f0d/1?pq-origsite=gscholar&cbl=18750&diss=y	https://scholar.google.com/scholar?cites=11095154511144543764&as_sdt=2005&sciodt=2007&hl=en	114	2024-08-02 01:22:46	BOOK								1	0.03	1	1	40	… in the North and British seizure of Trindade Island a decade earlier. Although both incidents had … Total strength was 14»249 soldiers and they had 42 canons and 15 machine guns.77 …		https://scholar.google.com/scholar?q=related:FObXRD7o-ZkJ:scholar.google.com/&scioq=%22trindade+island%22+metagenomics%7Cshotgun%7Camplicons+18s%7C16s%7Cits%7C%22internal+transcribed+spacer%22&hl=en&as_sdt=2007
1	CR Rodenbusch	Detecção e caracterização do herpesvírus associado à fibropapilomatose em tartarugas-verdes (Chelonia muydas) na costa brasileria	2012		lume.ufrgs.br	https://lume.ufrgs.br/handle/10183/40078	https://scholar.google.com/scholar?cites=11279989830998848581&as_sdt=2005&sciodt=2007&hl=en	119	2024-08-02 01:22:46									1	0.08	1	1	12	… nest almost exclusively on oceanic islands primarily on Trindade Island [16] but also on Atol … Amplicons of the expected size were sequenced in both directions on an ABI-PRISM 3100 …	https://lume.ufrgs.br/bitstream/handle/10183/40078/000827118.pdf?sequence=1	https://scholar.google.com/scholar?q=related:RXS0wvySipwJ:scholar.google.com/&scioq=%22trindade+island%22+metagenomics%7Cshotgun%7Camplicons+18s%7C16s%7Cits%7C%22internal+transcribed+spacer%22&hl=en&as_sdt=2007
0	PS Camara F Bones F Lopes F Oliveira C Barreto ...	… Reveals Cryptic Geographically-influenced Microbial Diversity After Anthropogenic Impact in Original Forest Soils on the Isolated Trindade Island South …	2022		academia.edu	https://www.academia.edu/download/100271402/latest.pdf		1	2024-08-02 01:22:46	PDF								0	0	0	6	2	… Its vegetation was severely damaged by human in uence in … contemporary microbial diversity of Trindade Island forest soils using … Taxonomic assignments were determined for amplicon …	https://www.academia.edu/download/100271402/latest.pdf	https://scholar.google.com/scholar?q=related:9oV4z8jYe58J:scholar.google.com/&scioq=%22trindade+island%22+metagenomics%7Cshotgun%7Camplicons+18s%7C16s%7Cits%7C%22internal+transcribed+spacer%22&hl=en&as_sdt=2007
0	DHC de Rezende ...	Perdida em Meio à Vastidão do Oceano Atlântico: Síntese da Tendência de Publicações Diversidade Biológica e Conservação na Ilha da Trindade	2023	Biodiversidade …	revistaeletronica.icmbio.gov.br	https://revistaeletronica.icmbio.gov.br/BioBR/article/view/2201		4	2024-08-02 01:22:46									0	0	0	2	1	… promote its conservation. Thus this paper aims to present a synthesis of the research performed on Trindade Island … The remaining corresponds to amplicon sequences of species of …	https://revistaeletronica.icmbio.gov.br/BioBR/article/download/2201/1447	https://scholar.google.com/scholar?q=related:6BYy7HVl6OsJ:scholar.google.com/&scioq=%22trindade+island%22+metagenomics%7Cshotgun%7Camplicons+18s%7C16s%7Cits%7C%22internal+transcribed+spacer%22&hl=en&as_sdt=2007
0	DK Morais	Petroleum effects on soil microbial communities	2015		locus.ufv.br	https://www.locus.ufv.br/handle/123456789/8468		5	2024-08-02 01:22:46									0	0	0	1	9	… on Trindade Island‟s soil microbial communities. In the second chapter we tested the protective effects of BCP on Trindade Island… o sequenciamento de amplicons de 16S rDNA para a …	https://www.locus.ufv.br/bitstream/123456789/8468/1/texto%20completo.pdf	https://scholar.google.com/scholar?q=related:rXRHXcd82d4J:scholar.google.com/&scioq=%22trindade+island%22+metagenomics%7Cshotgun%7Camplicons+18s%7C16s%7Cits%7C%22internal+transcribed+spacer%22&hl=en&as_sdt=2007
0	PEAS Câmara M Stech P Convey T Šantl-Temkiv ...	Assessing aerial biodiversity over Keller Peninsula King George Island Maritime Antarctica using DNA metabarcoding	2024	Antarctic …	cambridge.org	https://www.cambridge.org/core/journals/antarctic-science/article/assessing-aerial-biodiversity-over-keller-peninsula-king-george-island-maritime-antarctica-using-dna-metabarcoding/4E67BEAA576AE82BE370AFD914C54C3E		8	2024-08-02 01:22:46									0	0	0	5	1	… Extracted DNA was used as a template for generating polymerase chain reaction (PCR) amplicons. The internal transcribed spacer 2 (ITS2) of the nuclear ribosomal DNA was used as …		https://scholar.google.com/scholar?q=related:vHtH4dNT3wwJ:scholar.google.com/&scioq=%22trindade+island%22+metagenomics%7Cshotgun%7Camplicons+18s%7C16s%7Cits%7C%22internal+transcribed+spacer%22&hl=en&as_sdt=2007
0	JOF Brito MC Santos Silva MC Oliveira ...	Occurrence of Dictyosphaeria (Cladophorales Chlorophyta) species on the Brazilian coast and oceanic islands based on morphological and molecular data	2024	Botanica …	degruyter.com	https://www.degruyter.com/document/doi/10.1515/bot-2023-0066/html		17	2024-08-02 01:22:46		10.1515/bot-2023-0066							0	0	0	4	1	… algae by its multicellular vesiculated honeycomb-like thallus. … Amplicons for both markers were sequenced using the same … Eight samples from Trindade Island were identified as D. …	https://www.researchgate.net/profile/Jhullyrson-Brito-2/publication/380319483_Occurrence_of_Dictyosphaeria_Cladophorales_Chlorophyta_species_on_the_Brazilian_coast_and_oceanic_islands_based_on_morphological_and_molecular_data/links/668599310a25e27fbc23f6c9/Occurrence-of-Dictyosphaeria-Cladophorales-Chlorophyta-species-on-the-Brazilian-coast-and-oceanic-islands-based-on-morphological-and-molecular…	https://scholar.google.com/scholar?q=related:_bC-i8PBMXUJ:scholar.google.com/&scioq=%22trindade+island%22+metagenomics%7Cshotgun%7Camplicons+18s%7C16s%7Cits%7C%22internal+transcribed+spacer%22&hl=en&as_sdt=2007
0	FS Short TBB Boldrini BP D'Annunzio ...	Green Turtles of Guanabara Bay: Antibiotic Resistance Tumor Prevalence and Genetic Insights		Bia Prieto and Lôbo …	papers.ssrn.com	https://papers.ssrn.com/sol3/papers.cfm?abstract_id=4799597		20	2024-08-02 01:22:46									0	0	0	4		… closest rookery Trindade island (around 90 cm; ALMEIDA et … The most abundant CMA08.1 haplotype and its variants … Analysis of the metagenome will broaden our knowledge …		https://scholar.google.com/scholar?q=related:UpY2fWgnK7cJ:scholar.google.com/&scioq=%22trindade+island%22+metagenomics%7Cshotgun%7Camplicons+18s%7C16s%7Cits%7C%22internal+transcribed+spacer%22&hl=en&as_sdt=2007
0	VC SILVA	Protist diversity of the Atlantic Forest in Southeastern Brazil via DNA metabarcoding	2024		repositorio.unifei.edu.br	https://repositorio.unifei.edu.br/xmlui/handle/123456789/4089		22	2024-08-02 01:22:46									0	0	0	1	1	… the V4 region of the eukaryotic 18S rRNA gene in PCR reactions with the Phusion® High-Fidelity PCR Master Mix (New England Biolabs USA). The amplicons were sequenced with an …	https://repositorio.unifei.edu.br/jspui/bitstream/123456789/4089/1/Disserta%C3%A7%C3%A3o_2024085.pdf	https://scholar.google.com/scholar?q=related:fVfE5eS5b4AJ:scholar.google.com/&scioq=%22trindade+island%22+metagenomics%7Cshotgun%7Camplicons+18s%7C16s%7Cits%7C%22internal+transcribed+spacer%22&hl=en&as_sdt=2007
0	A Luza C Cordeiro A Aued D Barneche ...	Standardized datasets of Brazilian reef diversity in space and time	2024	Earth System …	essd.copernicus.org	https://essd.copernicus.org/preprints/essd-2024-244/		23	2024-08-02 01:22:46									0	0	0	5	1	… areas for conservation in the Brazilian province such as the Abrolhos Bank and the Trindade island. The … Pinheiro during two expeditions to Trindade Island organized by the TAMAR- …	https://essd.copernicus.org/preprints/essd-2024-244/essd-2024-244.pdf	https://scholar.google.com/scholar?q=related:ZQOEp1OzyvgJ:scholar.google.com/&scioq=%22trindade+island%22+metagenomics%7Cshotgun%7Camplicons+18s%7C16s%7Cits%7C%22internal+transcribed+spacer%22&hl=en&as_sdt=2007
0	R Gabriel RB Elias IR Amorim	Island Biology 2016: Conference program and abstracts: International Conference on Island Evolution Ecology and Conservation	2016	Arquipélago-Life and Marine …	repositorio.uac.pt	https://repositorio.uac.pt/handle/10400.3/4526		33	2024-08-02 01:22:46									0	0	0	3	8	[…] The Island Biology 2016 international conference brings together the expertise of a wide spectrum of research fields in order to expand knowledge and achieve a unified view of …	https://repositorio.uac.pt/bitstream/10400.3/4526/1/Supplement_9_ARQ_LMS_2016.pdf	https://scholar.google.com/scholar?q=related:PIbtYKKrK_MJ:scholar.google.com/&scioq=%22trindade+island%22+metagenomics%7Cshotgun%7Camplicons+18s%7C16s%7Cits%7C%22internal+transcribed+spacer%22&hl=en&as_sdt=2007
0	T Ferreira-Araújo P Hollanda-Carvalho F Di Dario ...	Different roles of the Amazon-Orinoco barrier on the genetic structure of two sardine genera from the Western Atlantic Ocean	2024	Hydrobiologia	Springer	https://link.springer.com/article/10.1007/s10750-023-05468-0		40	2024-08-02 01:22:46	HTML	10.1007/s10750-023-05468-0							0	0	0	4	1	… 20 cm standard length respectively Whitehead 1985) and putative subspecies along its … Amplicons were sequenced in both directions by Macrogen Inc (https://dna.macrogen.com/). …	https://link.springer.com/article/10.1007/s10750-023-05468-0	https://scholar.google.com/scholar?q=related:P6iBFYJfWMEJ:scholar.google.com/&scioq=%22trindade+island%22+metagenomics%7Cshotgun%7Camplicons+18s%7C16s%7Cits%7C%22internal+transcribed+spacer%22&hl=en&as_sdt=2007
0	VD Chiozzo WD de Amorim	COMPATIBILITY AND STRATEGIC CONVERGENCE: MILITARY AND ENVIRONMENTAL APPROACHES TOWARDS SOUTH ATLANTIC BRAZILIAN OCEANIC …		academia.edu		https://www.academia.edu/download/83701095/document_1_.pdf		42	2024-08-02 01:22:46	PDF								0	0	0	2		… with its vessels anti-aircraft guns and other military facilities”. … to its geographical position in the South Atlantic and particularly due to its location in relation to our coast Trindade Island …	https://www.academia.edu/download/83701095/document_1_.pdf	https://scholar.google.com/scholar?q=related:p28PaMG_nqkJ:scholar.google.com/&scioq=%22trindade+island%22+metagenomics%7Cshotgun%7Camplicons+18s%7C16s%7Cits%7C%22internal+transcribed+spacer%22&hl=en&as_sdt=2007
0	NC Prévost-Bouré SS Dequiedt ...	Turnover of soil microbial diversity is driven by wide-scale environmental heterogeneity	2013	… on Soil Metagenomics	hal.science	https://hal.science/hal-01004768/		46	2024-08-02 01:22:46									0	0	0	3	11	… and bagasse mulching practices determined by Ion torrent ITS amplicon sequencing … shotgun metagenomic sequence analysis including the notions of sequence quality metagenomic …	https://hal.science/hal-01004768/document	https://scholar.google.com/scholar?q=related:Zker6rTfpTwJ:scholar.google.com/&scioq=%22trindade+island%22+metagenomics%7Cshotgun%7Camplicons+18s%7C16s%7Cits%7C%22internal+transcribed+spacer%22&hl=en&as_sdt=2007
0	S Cobb	'In the shadow of the Alabama': Royal Navy appreciations of the role of armed merchant cruisers 1900–1918	2016	Britain's War At Sea 1914-1918	taylorfrancis.com	https://www.taylorfrancis.com/chapters/edit/10.4324/9781315570044-10/shadow-alabama-royal-navy-appreciations-role-armed-merchant-cruisers-1900%E2%80%931918-stephen-cobb		53	2024-08-02 01:22:46		10.4324/9781315570044-10/shadow-alabama-royal-navy-appreciations-role-armed-merchant-cruisers-1900%E2%80%931918-stephen-cobb							0	0	0	1	8	Semmes reflected ruefully that though he had done ‘the best we could with our limited means to harass and cripple the enemy’s commerce that important sinew of war’ the Union had …		https://scholar.google.com/scholar?q=related:tUXVRazpZegJ:scholar.google.com/&scioq=%22trindade+island%22+metagenomics%7Cshotgun%7Camplicons+18s%7C16s%7Cits%7C%22internal+transcribed+spacer%22&hl=en&as_sdt=2007
0	NC Roos	Herbivores on the plate: the growing fishing pressure on parrotfish	2015		repositorio.ufrn.br	https://repositorio.ufrn.br/handle/123456789/23037		58	2024-08-02 01:22:46									0	0	0	1	9	… Bayesian spatial-temporal approach to map the distribution of these three species along the Brazilian coast using landing data from three different gears (gillnets spear guns and …	https://repositorio.ufrn.br/bitstream/123456789/23037/1/HerbivoresPlateGrowing_Roos_2015.pdf	https://scholar.google.com/scholar?q=related:k9xVmVQvxfAJ:scholar.google.com/&scioq=%22trindade+island%22+metagenomics%7Cshotgun%7Camplicons+18s%7C16s%7Cits%7C%22internal+transcribed+spacer%22&hl=en&as_sdt=2007
0	U Klümper L Riber A Sannazzaro ...	Assessing the permissiveness of complex bacterial communities towards conjugal plasmids–Development of a novel method	2013	12th Symposium on …	orbit.dtu.dk	https://orbit.dtu.dk/files/56157751/BAGECO2013_HP_WEB.pdf		61	2024-08-02 01:22:46	PDF								0	0	0	4	11	… Biomass hydrolyzing enzymes identified by functional screening of a metagenomic library … metal contaminated sites by metagenomic approaches and resistance gene quantifications …	https://orbit.dtu.dk/files/56157751/BAGECO2013_HP_WEB.pdf	https://scholar.google.com/scholar?q=related:yoC8dqDoPXkJ:scholar.google.com/&scioq=%22trindade+island%22+metagenomics%7Cshotgun%7Camplicons+18s%7C16s%7Cits%7C%22internal+transcribed+spacer%22&hl=en&as_sdt=2007
0	X Guan D Jia X Liu C Ding J Guo M Yao ...	Combined influence of the nanoplastics and polycyclic aromatic hydrocarbons exposure on microbial community in seawater environment	2024	Science of The Total …	Elsevier	https://www.sciencedirect.com/science/article/pii/S0048969724039196		65	2024-08-02 01:22:46									0	0	0	7	1	… We employed 16S rRNA gene amplicon sequencing for analyzing microbial community composition and structure. Furthermore we assessed co-occurrence networks to advance our …		https://scholar.google.com/scholar?q=related:B3IDlIoQSjYJ:scholar.google.com/&scioq=%22trindade+island%22+metagenomics%7Cshotgun%7Camplicons+18s%7C16s%7Cits%7C%22internal+transcribed+spacer%22&hl=en&as_sdt=2007
0	OS Obayori MO Fashola AO Ashade IM Osinowo ...	Degradation of crude oil by the microbial populations of Lagos and Ologe Lagoon waters		jrrslasu.com		https://jrrslasu.com/publications/JRRS_ppaper711_2024-02-11_1479190360.pdf		66	2024-08-02 01:22:46	PDF								0	0	0	5		Introduction: hydrocarbon contamination of surface waters as a result of anthropogenic activity poses threat to ecosystems and counter their beneficial uses. Some indigenous microbial …	https://jrrslasu.com/publications/JRRS_ppaper711_2024-02-11_1479190360.pdf	https://scholar.google.com/scholar?q=related:WJq22rNL-9AJ:scholar.google.com/&scioq=%22trindade+island%22+metagenomics%7Cshotgun%7Camplicons+18s%7C16s%7Cits%7C%22internal+transcribed+spacer%22&hl=en&as_sdt=2007
0	HC Lial SC Silva MAA Lugo LB Keid JL Catão-Dias ...	Molecular Detection and Characterization of Mycoplasma spp. in Marine Mammals Brazil		researchgate.net		https://www.researchgate.net/profile/Carlos-Sacristan-3/publication/375895970_Duarte-Benvenuto_et_al_2023_Molecular_Detection_and_Characterization_of_Mycoplasma_spp_in_Marine_Mammals_Brazil/links/6561dbc1b1398a779db5ba06/Duarte-Benvenuto-et-al-2023-Molecular-Detection-and-Characterization-of-Mycoplasma-spp-in-Marine-Mammals-Brazil.pdf		69	2024-08-02 01:22:46	PDF								0	0	0	6		… We detected the same 16S rRNA sequence type in 3 different species Franciscana dolphin … A wandering Weddell seal (Leptonychotes weddellii) at Trindade Island Brazil: the extreme …	https://www.researchgate.net/profile/Carlos-Sacristan-3/publication/375895970_Duarte-Benvenuto_et_al_2023_Molecular_Detection_and_Characterization_of_Mycoplasma_spp_in_Marine_Mammals_Brazil/links/6561dbc1b1398a779db5ba06/Duarte-Benvenuto-et-al-2023-Molecular-Detection-and-Characterization-of-Mycoplasma-spp-in-Marine-Mammals-Brazil.pdf	https://scholar.google.com/scholar?q=related:vDQV-ty39HUJ:scholar.google.com/&scioq=%22trindade+island%22+metagenomics%7Cshotgun%7Camplicons+18s%7C16s%7Cits%7C%22internal+transcribed+spacer%22&hl=en&as_sdt=2007
0	CA Salgado PMP Vidigal MCD Vanetti	Biodegradation of polyurethanes by Staphylococcus warneri and by microbial co-culture	2024	Chemosphere	Elsevier	https://www.sciencedirect.com/science/article/pii/S0045653524010622		72	2024-08-02 01:22:46									0	0	0	3	1	… mellonellalarvae taxonomically identified by sequencing its genome and evaluated for its ability to biodegrade PU in pure culture and co-culture with Serratia liquefaciensL135. The …		https://scholar.google.com/scholar?q=related:h5g5STNHvc0J:scholar.google.com/&scioq=%22trindade+island%22+metagenomics%7Cshotgun%7Camplicons+18s%7C16s%7Cits%7C%22internal+transcribed+spacer%22&hl=en&as_sdt=2007
0	E Odle S Kahng S Riewluang K Kurihara ...	GINSA: an accumulator for paired locality and next-generation small ribosomal subunit sequence data	2024	…	ncbi.nlm.nih.gov	https://www.ncbi.nlm.nih.gov/pmc/articles/PMC10987208/		75	2024-08-02 01:22:46	HTML								0	0	0	5	1	… Cryptic diversity of black band disease cyanobacteria in Siderastrea siderea corals revealed by chemical ecology and comparative genome-resolved metagenomics. Mar Drugs 2023;21…	https://www.ncbi.nlm.nih.gov/pmc/articles/PMC10987208/	https://scholar.google.com/scholar?q=related:R0jj0yIMW2kJ:scholar.google.com/&scioq=%22trindade+island%22+metagenomics%7Cshotgun%7Camplicons+18s%7C16s%7Cits%7C%22internal+transcribed+spacer%22&hl=en&as_sdt=2007
0	JF Araújo RCR Fernandes EM Rodrigues ...	DISRUPTION AND RECOVERY OF BACTERIAL COMMUNITY STRUCTURE OF AN ATLANTIC FOREST SOIL AFTER EXPOSURE TO GASOHOL	2019	Oecologia …	academia.edu	https://www.academia.edu/download/104039771/132912fcbe15511ce816708fbde058bdfb9a.pdf		76	2024-08-02 01:22:46	PDF								0	0	0	4	5	… The remainder PCR amplicons were applied onto an 8% (wt/vol) polyacrylamide gel … along the coast of Trindade Island Brazil. Journal of Environmental Management. 156(1) 15–22. …	https://www.academia.edu/download/104039771/132912fcbe15511ce816708fbde058bdfb9a.pdf	https://scholar.google.com/scholar?q=related:1LmtrI5gqUMJ:scholar.google.com/&scioq=%22trindade+island%22+metagenomics%7Cshotgun%7Camplicons+18s%7C16s%7Cits%7C%22internal+transcribed+spacer%22&hl=en&as_sdt=2007
0	A do Heroísmo	2nd Meeting 18-22 July 2016 Angra do Heroísmo Azores Portugal						79	2024-08-02 01:22:46	CITATION								0	0	0	1			https://www.researchgate.net/profile/Rui-Elias-2/publication/308018370_Conference_Program_and_Abstracts_of_the_2nd_International_Conference_on_Island_Evolution_Ecology_and_Conservation_Island_Biology_2016_18-22_July_2016_Angra_do_Heroismo_Azores_Portugal/links/57fb72b408ae280dd0c4b48b/Conference-Program-and-Abstracts-of-the-2nd-International-Conference-on-Island-Evolution-Ecology-and-Conservation…	https://scholar.google.com/scholar?q=related:-DGu69VEdkUJ:scholar.google.com/&scioq=%22trindade+island%22+metagenomics%7Cshotgun%7Camplicons+18s%7C16s%7Cits%7C%22internal+transcribed+spacer%22&hl=en&as_sdt=2007
0	BM Shamblin	Genetic structure of loggerhead turtle (Caretta caretta) and green turtle (Chelonia mydas) populations nesting in the Northwest Atlantic inferred from …	2011		getd.libs.uga.edu	http://getd.libs.uga.edu/pdfs/shamblin_brian_m_201105_phd.pdf		84	2024-08-02 01:22:46	PDF								0	0	0	1	13	… G(USB Corporation) to 7 µl of PCR amplicon and incubated according to manufacturer’s instructions. The mtDNA amplicons were sequenced in both directions using ABI BigDye v3.1 (…	http://getd.libs.uga.edu/pdfs/shamblin_brian_m_201105_phd.pdf	https://scholar.google.com/scholar?q=related:ERi3qMMQFDAJ:scholar.google.com/&scioq=%22trindade+island%22+metagenomics%7Cshotgun%7Camplicons+18s%7C16s%7Cits%7C%22internal+transcribed+spacer%22&hl=en&as_sdt=2007
0	JE Carter	Allometric Growth Patterns of Laboratory-Reared Florida Blenny (Chasmodes Saburrae) and Phylogenetic Review of Hypleurochilus Blenniids in the Northwestern …	2021		oaktrust.library.tamu.edu	https://oaktrust.library.tamu.edu/handle/1969.1/193215		87	2024-08-02 01:22:46									0	0	0	1	3	Cryptobenthic fishes (CFs) occupy a critical functional group in the trophodynamics of their respective ecological system. The percomorph suborder Blennioidei encompasses ~900 …	https://oaktrust.library.tamu.edu/bitstream/handle/1969.1/193215/CARTER-THESIS-2021.pdf?sequence=1	https://scholar.google.com/scholar?q=related:safheskc1PkJ:scholar.google.com/&scioq=%22trindade+island%22+metagenomics%7Cshotgun%7Camplicons+18s%7C16s%7Cits%7C%22internal+transcribed+spacer%22&hl=en&as_sdt=2007
0	KP Nam S Doyun	Self-dying recombinant microorganism for measuring soil and water contamination	2013	US Patent 8 557 559	Google Patents	https://patents.google.com/patent/US8557559B2/en		89	2024-08-02 01:22:46									0	0	0	2	11	… appended to the present specification is herein incorporated by reference in its entirety. … for potential use in cases of oil bioremediation along the coast of Trindade Island Brazil …	https://patentimages.storage.googleapis.com/59/4c/9b/b855c9f8d734f7/US8557559.pdf	https://scholar.google.com/scholar?q=related:9M2W8Nn8ijcJ:scholar.google.com/&scioq=%22trindade+island%22+metagenomics%7Cshotgun%7Camplicons+18s%7C16s%7Cits%7C%22internal+transcribed+spacer%22&hl=en&as_sdt=2007
0	W ZEIDLER ED BOUSFIELD M SEZGIN	AMPHIPOD NEWSLETTER 41		marinespecies.org		https://www.marinespecies.org/amphipoda/newsletters/Amphipod_Newsletter-41_2017.pdf		100	2024-08-02 01:22:46	PDF								0	0	0	3		… He was an exceptional scientist one of the BIG Guns so to speak a world authority on the systematics of amphipod crustaceans. He discovered and described over 300 new species …	https://www.marinespecies.org/amphipoda/newsletters/Amphipod_Newsletter-41_2017.pdf	https://scholar.google.com/scholar?q=related:xeZuVHBJhjMJ:scholar.google.com/&scioq=%22trindade+island%22+metagenomics%7Cshotgun%7Camplicons+18s%7C16s%7Cits%7C%22internal+transcribed+spacer%22&hl=en&as_sdt=2007
0	J Break	PRISON ESCAPES 4		rageuniversity.com		http://rageuniversity.com/PRISONESCAPE/TRUE%20PRISON%20ESCAPES/PRISON%20ESCAPES%204.pdf		103	2024-08-02 01:22:46	PDF								0	0	0	1		… his farm up the road grabbed his shotgun and ran to aid the posse. … to Trindade Island. When Washington Luís became President of Brazil in 1926 all the prisoners from Trindade Island …	http://rageuniversity.com/PRISONESCAPE/TRUE%20PRISON%20ESCAPES/PRISON%20ESCAPES%204.pdf	https://scholar.google.com/scholar?q=related:HCAkmUQz3dMJ:scholar.google.com/&scioq=%22trindade+island%22+metagenomics%7Cshotgun%7Camplicons+18s%7C16s%7Cits%7C%22internal+transcribed+spacer%22&hl=en&as_sdt=2007
0	HH Collins	The United States and Brazil: a naval partnership for the twenty-first century?	1991		core.ac.uk	https://core.ac.uk/download/pdf/36723734.pdf		107	2024-08-02 01:22:46	PDF								0	0	0	1	33	… the other contracting party will come to its aid as an ally and will support it with all its military … in establishing a joint-use military base on Trindade Island in the South Atlantic 71 is further …	https://core.ac.uk/download/pdf/36723734.pdf	https://scholar.google.com/scholar?q=related:CspZQmYUelgJ:scholar.google.com/&scioq=%22trindade+island%22+metagenomics%7Cshotgun%7Camplicons+18s%7C16s%7Cits%7C%22internal+transcribed+spacer%22&hl=en&as_sdt=2007
0	RT Moore RG Menzel RE Simpson ...	SECTION II. WATER	1967	… Health Data and …	books.google.com	https://books.google.com/books?hl=en&lr=&id=8lM2AAAAIAAJ&oi=fnd&pg=PA135-IA13&dq=%22trindade+island%22+metagenomics%7Cshotgun%7Camplicons+18s%7C16s%7Cits%7C%22internal+transcribed+spacer%22&ots=41yMIic0KC&sig=3fx1WO04AKnIy0I-bqQsliji6nY		109	2024-08-02 01:22:46	HTML								0	0	0	4	57	… The radioactive portion of the aerosols to which uranium miners are exposed is formed by the decay of radon-222 and its daughters in the mine atmosphere. Radon-222 and its 3 Each …	https://books.google.com/books?hl=en&lr=&id=8lM2AAAAIAAJ&oi=fnd&pg=PA135-IA13&dq=%22trindade+island%22+metagenomics%7Cshotgun%7Camplicons+18s%7C16s%7Cits%7C%22internal+transcribed+spacer%22&ots=41yMIic0KC&sig=3fx1WO04AKnIy0I-bqQsliji6nY	https://scholar.google.com/scholar?q=related:Njr8QH7tXlYJ:scholar.google.com/&scioq=%22trindade+island%22+metagenomics%7Cshotgun%7Camplicons+18s%7C16s%7Cits%7C%22internal+transcribed+spacer%22&hl=en&as_sdt=2007
0	S Campbell	STRANGE DAZE Number 13 May 1997	1997		noufors.com	http://www.noufors.com/Documents/Books %20Manuals%20and%20Published%20Papers/Specialty%20UFO%20Publications/British%20UFO%20Publications/Strange%20Daze/Number%2013.pdf		111	2024-08-02 01:22:46	PDF								0	0	0	1	27	… c realm its questionable attributes and its uncertain influence upon our lives. strikes me as more relevant to actual human experience than any modern work of science or psychology. "…	http://www.noufors.com/Documents/Books %20Manuals%20and%20Published%20Papers/Specialty%20UFO%20Publications/British%20UFO%20Publications/Strange%20Daze/Number%2013.pdf	https://scholar.google.com/scholar?q=related:aDnag-u_fYUJ:scholar.google.com/&scioq=%22trindade+island%22+metagenomics%7Cshotgun%7Camplicons+18s%7C16s%7Cits%7C%22internal+transcribed+spacer%22&hl=en&as_sdt=2007
0	S Chen	A Comparison of Response Technologies for Offshore Oil Spills Exxon Valdez and BP Gulf of Mexico Oil Spills	2018		repository.lib.ncsu.edu	https://repository.lib.ncsu.edu/bitstream/1840.20/36266/1/Chen %20Shuyu%20final.pdf		112	2024-08-02 01:22:46	PDF								0	0	0	1	6	… of its genome reveal how this bacterium grows efficiently on … isotope probing (SIP) and metagenomics techniques allowed … along the coast of Trindade Island Brazil. Journal of …	https://repository.lib.ncsu.edu/bitstream/1840.20/36266/1/Chen %20Shuyu%20final.pdf	https://scholar.google.com/scholar?q=related:2QKcHulIiJsJ:scholar.google.com/&scioq=%22trindade+island%22+metagenomics%7Cshotgun%7Camplicons+18s%7C16s%7Cits%7C%22internal+transcribed+spacer%22&hl=en&as_sdt=2007
0	JT Abbott	The Outsider'S Guide to Ufos: Volume 1: Mystery and Science	2017		books.google.com	https://books.google.com/books?hl=en&lr=&id=DbdDDwAAQBAJ&oi=fnd&pg=PT21&dq=%22trindade+island%22+metagenomics%7Cshotgun%7Camplicons+18s%7C16s%7Cits%7C%22internal+transcribed+spacer%22&ots=hp2FUIV1Ch&sig=ltFAeKqyVPIct4iIWtfjDg1usHk		113	2024-08-02 01:22:46	BOOK								0	0	0	1	7	… Its central thesis is that the UFO phenomenon remains unproven but is sufficiently well-evidenced to require much more serious … There are some heavy guns on both sides of the issue. …		https://scholar.google.com/scholar?q=related:6yHXX_0DQ8YJ:scholar.google.com/&scioq=%22trindade+island%22+metagenomics%7Cshotgun%7Camplicons+18s%7C16s%7Cits%7C%22internal+transcribed+spacer%22&hl=en&as_sdt=2007
0	JL Gasparini	Hudson Tercio Pinheiro		researchgate.net		https://www.researchgate.net/profile/Hudson-Pinheiro/publication/284603065_Peixes_recifais_do_complexo_insular_oceanico_Trindade-Martin_Vaz_Novas_ocorrencias_atividades_de_pesca_mortandade_natural_e_conservacao/links/5a2f9fae0f7e9bfe81705b4c/Peixes-recifais-do-complexo-insular-oceanico-Trindade-Martin-Vaz-Novas-ocorrencias-atividades-de-pesca-mortandade-natural-e-conservacao.pdf		117	2024-08-02 01:22:46	PDF								0	0	0	1		… Ilha da Trindade (Trindade Island) arouse extreme interest … amature fishing activities held in its shallow and deep waters. … recreacional exercida por alguns militares foi realizada de …	https://www.researchgate.net/profile/Hudson-Pinheiro/publication/284603065_Peixes_recifais_do_complexo_insular_oceanico_Trindade-Martin_Vaz_Novas_ocorrencias_atividades_de_pesca_mortandade_natural_e_conservacao/links/5a2f9fae0f7e9bfe81705b4c/Peixes-recifais-do-complexo-insular-oceanico-Trindade-Martin-Vaz-Novas-ocorrencias-atividades-de-pesca-mortandade-natural-e-conservacao.pdf	https://scholar.google.com/scholar?q=related:ueVJOIR9LW0J:scholar.google.com/&scioq=%22trindade+island%22+metagenomics%7Cshotgun%7Camplicons+18s%7C16s%7Cits%7C%22internal+transcribed+spacer%22&hl=en&as_sdt=2007
0	VD Chiozzo WD de Amorim	Compatibility and strategic convergence	2021	Revista da EGN	portaldeperiodicos.marinha.mil.br	http://www.portaldeperiodicos.marinha.mil.br/index.php/revistadaegn/article/download/4160/4017		118	2024-08-02 01:22:46	PDF								0	0	0	2	3	… with its vessels anti-aircraft guns and other military facilities”. … to its geographical position in the South Atlantic and particularly due to its location in relation to our coast Trindade Island …	http://www.portaldeperiodicos.marinha.mil.br/index.php/revistadaegn/article/download/4160/4017	https://scholar.google.com/scholar?q=related:AiVAB1-vTZQJ:scholar.google.com/&scioq=%22trindade+island%22+metagenomics%7Cshotgun%7Camplicons+18s%7C16s%7Cits%7C%22internal+transcribed+spacer%22&hl=en&as_sdt=2007
0	JMM Neves	Filogeografia de Entomacrodus vomerinus (Valenciennes 1836)(Teleostei: Blenniidae) na província Atlântico Sudoeste Tropical: existe conectividade entre habitats …	2015		repositorio.ufal.br	https://www.repositorio.ufal.br/handle/riufal/5381		120	2024-08-02 01:22:46									0	0	0	1	9	Entomacrodus vomerinus (Valenciennes 1836) é um peixe demersal endêmico da província Atlântico Sudoeste Tropical habitando poças de maré em ambientes recifais continentais …	https://www.repositorio.ufal.br/bitstream/riufal/5381/1/Filogeografia%20de%20Entomacrodus%20vomerinus%20(Valenciennes %201836)%20(Teleostei%20Blenniidae)%20na%20prov%C3%ADncia%20Atl%C3%A2ntico%20Sudoeste%20Tropical%20existe%20conectividade%20entre%20habitats%20oce%C3%A2nicos%20e%20continentais.pdf	https://scholar.google.com/scholar?q=related:gCjlfQfJuFsJ:scholar.google.com/&scioq=%22trindade+island%22+metagenomics%7Cshotgun%7Camplicons+18s%7C16s%7Cits%7C%22internal+transcribed+spacer%22&hl=en&as_sdt=2007
0	DB Amorim	Aspectos patológicos e moleculares em baleia-jubarte (Megaptera novaeangliae) e lobo-marinho-sul-americano (Arctocephalus australis) no Sul do Brasil	2023		lume.ufrgs.br	https://lume.ufrgs.br/handle/10183/265949		121	2024-08-02 01:22:46									0	0	0	1	1	… The amplicons were purified and … ITS-2 sequences. available from GenBank using Clustal/W v.1.8.1; an identity matrix was calculated with BioEdit software and ITS-2 amplicons were …	https://lume.ufrgs.br/bitstream/handle/10183/265949/001177855.pdf?sequence=1	https://scholar.google.com/scholar?q=related:Qlt1xsis-QQJ:scholar.google.com/&scioq=%22trindade+island%22+metagenomics%7Cshotgun%7Camplicons+18s%7C16s%7Cits%7C%22internal+transcribed+spacer%22&hl=en&as_sdt=2007
0	GR dos Açores HR Martins JG Pereira R Higgins ...	INTERNET RESOURCES						122	2024-08-02 01:22:46	CITATION								0	0	0	5			https://gba.uac.pt/fotos/noticias/1468830711.pdf	https://scholar.google.com/scholar?q=related:Dwre34vqVogJ:scholar.google.com/&scioq=%22trindade+island%22+metagenomics%7Cshotgun%7Camplicons+18s%7C16s%7Cits%7C%22internal+transcribed+spacer%22&hl=en&as_sdt=2007
0	劉卜逢	利用生物堆系統整治風化柴油污染土壤: 以不同添加物和中尺度規模進行研究						123	2024-08-02 01:22:46	CITATION								0	0	0	1				https://scholar.google.com/scholar?q=related:fZcQrhzKD58J:scholar.google.com/&scioq=%22trindade+island%22+metagenomics%7Cshotgun%7Camplicons+18s%7C16s%7Cits%7C%22internal+transcribed+spacer%22&hl=en&as_sdt=2007
0	DDASAC CROSTOSAS EMM DO BRASIL BASEADA	Talita Vieira-Pinto		pdfs.semanticscholar.org		https://pdfs.semanticscholar.org/8914/241b3d4986e15b513612ba23f022d8580378.pdf		124	2024-08-02 01:22:46	PDF								0	0	0	2		… Considering the importance of CCA and its difficult taxonomy the present study aims to contribute to the knowledge of the taxonomy and phylogeny through the use of molecular …	https://pdfs.semanticscholar.org/8914/241b3d4986e15b513612ba23f022d8580378.pdf	https://scholar.google.com/scholar?q=related:1lWS6eR0sygJ:scholar.google.com/&scioq=%22trindade+island%22+metagenomics%7Cshotgun%7Camplicons+18s%7C16s%7Cits%7C%22internal+transcribed+spacer%22&hl=en&as_sdt=2007
0	T Vieira-Pinto	Diversidade das algas calcárias crostosas do Brasil baseada em marcadores moleculares e morfologia	2016		teses.usp.br	https://www.teses.usp.br/teses/disponiveis/41/41132/tde-12122016-122033/en.php		125	2024-08-02 01:22:46									0	0	0	1	8	… Considering the importance of CCA and its difficult taxonomy the present study aims to contribute to the knowledge of the taxonomy and phylogeny through the use of molecular …	https://www.teses.usp.br/teses/disponiveis/41/41132/tde-12122016-122033/publico/TalitaVieiraPinto_completacorrigida.pdf	https://scholar.google.com/scholar?q=related:tiKUzQ_TafcJ:scholar.google.com/&scioq=%22trindade+island%22+metagenomics%7Cshotgun%7Camplicons+18s%7C16s%7Cits%7C%22internal+transcribed+spacer%22&hl=en&as_sdt=2007
0	LJ Benevides	Comportamento de fuga de peixes alvo da pesca-sub em recifes com diferentes manejos	2016		repositorio.ufal.br	https://www.repositorio.ufal.br/handle/riufal/5336		126	2024-08-02 01:22:46									0	0	0	1	8	An unsuccessful escape by an animal under threat of predation represents death and the loss of all fitness that could be acquired in the future. However even prey that suffers a non-…	https://www.repositorio.ufal.br/bitstream/riufal/5336/1/Comportamento%20de%20fuga%20de%20peixes%20alvo%20da%20pesca-sub%20em%20recifes%20com%20diferentes%20manejos.pdf	https://scholar.google.com/scholar?q=related:cYvhOGYLrfYJ:scholar.google.com/&scioq=%22trindade+island%22+metagenomics%7Cshotgun%7Camplicons+18s%7C16s%7Cits%7C%22internal+transcribed+spacer%22&hl=en&as_sdt=2007
0	PS SANTOS	Taxonomia integrativa de quatro espécies de camarões Alpheidae (Crustacea: Decapoda) com padrão de distribuição disjunta	2019		repositorio.ufpe.br	https://repositorio.ufpe.br/handle/123456789/33679		127	2024-08-02 01:22:46									0	0	0	1	5	… os genes mitocondriais Citocromo Oxidase I e/ou 16S. Alpheus peasei foi redescrita da espécie e a … Alpheus peasei was one of the most abundant species in Trindade Island (Anker et …	https://repositorio.ufpe.br/bitstream/123456789/33679/1/TESE%20Patr%C3%ADcia%20Souza%20dos%20Santos.pdf	https://scholar.google.com/scholar?q=related:xsMaKONrcoIJ:scholar.google.com/&scioq=%22trindade+island%22+metagenomics%7Cshotgun%7Camplicons+18s%7C16s%7Cits%7C%22internal+transcribed+spacer%22&hl=en&as_sdt=2007
0	MB Guimarães	Bioprospecção in sílico de genes codificadores de L-aspariginase em amostras de solo de Dourados-MS	2021		repositorio.ufgd.edu.br	https://repositorio.ufgd.edu.br/jspui/handle/prefix/4959		128	2024-08-02 01:22:46									0	0	0	1	3	… Foram utilizados as ORFs originadas do NGS pelo método shotgun para alinhamento local com banco de dados formatado com sequências da enzima. Os resultados foram …	https://repositorio.ufgd.edu.br/jspui/bitstream/prefix/4959/1/MateusBarbosaGuimar%C3%A3es.pdf	https://scholar.google.com/scholar?q=related:iVQthybnMeoJ:scholar.google.com/&scioq=%22trindade+island%22+metagenomics%7Cshotgun%7Camplicons+18s%7C16s%7Cits%7C%22internal+transcribed+spacer%22&hl=en&as_sdt=2007
0	G Koerich	Da fisiologia ao nicho: presente e futuro dos bancos de rodolitos brasileiros	2020		repositorio.ufsc.br	https://repositorio.ufsc.br/handle/123456789/220424		129	2024-08-02 01:22:46									0	0	0	1	4	… reduction of light penetration in the water column in populations of oceanic islands two field experiments were made one in Fernando de Noronha (7 days) and one in Trindade Island (…	https://repositorio.ufsc.br/bitstream/handle/123456789/220424/PECO0169-D.pdf?sequence=-1	https://scholar.google.com/scholar?q=related:gsaGtfioSCYJ:scholar.google.com/&scioq=%22trindade+island%22+metagenomics%7Cshotgun%7Camplicons+18s%7C16s%7Cits%7C%22internal+transcribed+spacer%22&hl=en&as_sdt=2007
0	ALC Souza	Estrutura populacional e história demográfica das populações de baleias jubarte (Megaptera novaeangliae) da América do Sul	2013		meriva.pucrs.br	https://meriva.pucrs.br/dspace/handle/10923/5664		130	2024-08-02 01:22:46									0	0	0	1	11	A caça comercial baleeira durante o século XX reduziu significativamente a maioria das populações de baleias jubarte (Megaptera novaeangliae). Sete estoques reprodutivos (AG) …	https://meriva.pucrs.br/dspace/bitstream/10923/5664/1/000454365-Texto%2BCompleto-0.pdf	https://scholar.google.com/scholar?q=related:ZkRaqVp_PLYJ:scholar.google.com/&scioq=%22trindade+island%22+metagenomics%7Cshotgun%7Camplicons+18s%7C16s%7Cits%7C%22internal+transcribed+spacer%22&hl=en&as_sdt=2007
0	TS Dantas	DNA–Barcode de Metzgeria Raddi (Marchantiophyta) do Brasil	2020		icts.unb.br	http://icts.unb.br/jspui/handle/10482/38508		133	2024-08-02 01:22:46									0	0	0	1	4	… the characteristics considered important for the delimitation of its species are highly variable … amplicons foram gerados em duas partes separadamente utilizando dois pares de primers …	http://icts.unb.br/jspui/bitstream/10482/38508/1/2019_TamaraSilvaDantas.pdf	https://scholar.google.com/scholar?q=related:a0haZyaQGNcJ:scholar.google.com/&scioq=%22trindade+island%22+metagenomics%7Cshotgun%7Camplicons+18s%7C16s%7Cits%7C%22internal+transcribed+spacer%22&hl=en&as_sdt=2007
0	JNO Acero JNO Acero	Evaluación de Cambios en la Abundancia del Gen Codificante para la Enzima Catecol		Environmental Engineering Research	repositorio.udes.edu.co	https://repositorio.udes.edu.co/bitstreams/dd13a3fe-6d10-4623-8ae6-a8cbe0e548ed/download		134	2024-08-02 01:22:46	PDF								0	0	0	2		… se realizó qPCR con el propósito de cuantificar los genes ARNr 16S y catA del consorcio … de asfaltenos normalizado con el gen ARNr 16S para 16S es mayor con respecto a Tbact (Fig. …	https://repositorio.udes.edu.co/bitstreams/dd13a3fe-6d10-4623-8ae6-a8cbe0e548ed/download	https://scholar.google.com/scholar?q=related:LIhpqn2pNZUJ:scholar.google.com/&scioq=%22trindade+island%22+metagenomics%7Cshotgun%7Camplicons+18s%7C16s%7Cits%7C%22internal+transcribed+spacer%22&hl=en&as_sdt=2007
0	CPB GUSMÃO	Taxonomia e filogenética de peixes de ambientes recifais com base em dados moleculares	2013		repositorio.ufpe.br	https://repositorio.ufpe.br/handle/123456789/10603		135	2024-08-02 01:22:46									0	0	0	1	11	… Os amplicons foram separados em gel de agarose a 1% corados com brometo de etídio o qual permite verificar a qualidade das amplificações obtidas; banda intensa bem definida e …	https://repositorio.ufpe.br/bitstream/123456789/10603/1/DISSERTA%C3%87%C3%83O%20Camila%20Gusm%C3%A3o.pdf	https://scholar.google.com/scholar?q=related:NoeGAu5VUjsJ:scholar.google.com/&scioq=%22trindade+island%22+metagenomics%7Cshotgun%7Camplicons+18s%7C16s%7Cits%7C%22internal+transcribed+spacer%22&hl=en&as_sdt=2007
0	ME Ordoñez Obando OJ Rodas López K Escobar	Análisis de la contaminación hídrica atmosférica y acústica producidas durante las actividades hidrocarburíferas de la región Latam	2021		dspace.espol.edu.ec	https://www.dspace.espol.edu.ec/handle/123456789/52285		136	2024-08-02 01:22:46									0	0	0	3	3	Los tipos de contaminación generados por la industria hidrocarburífera a lo largo de los años perjudicando directa e indirectamente al ecosistema en el que vivimos. La información …	https://www.dspace.espol.edu.ec/bitstream/123456789/52285/1/T-70599%20ORDO%C3%91EZ%20-%20RODAS.pdf	https://scholar.google.com/scholar?q=related:nabwbS1GK4UJ:scholar.google.com/&scioq=%22trindade+island%22+metagenomics%7Cshotgun%7Camplicons+18s%7C16s%7Cits%7C%22internal+transcribed+spacer%22&hl=en&as_sdt=2007
